# Supplementary material for: Stable and reactive diacetyliminoxyl radical in oxidative C–O coupling with β-dicarbonyl compounds and their complexes
Source: Royal Society of Chemistry journal article supplement (doi:10.1039/d1ob01269j), 2021-01-01

## ***Supporting Information***

### **Stable and reactive diacetyliminoxyl radical in oxidative C–O coupling with $\beta$ -dicarbonyl compounds and their complexes**

Alexander S. Budnikov<sup>a</sup>, Igor B. Krylov<sup>\*a,c</sup>, Andrey V. Lastovko<sup>a,b</sup>, Stanislav A. Paveliev<sup>a</sup>, Alexander R. Romanenko<sup>c</sup>, Gennady I. Nikishin<sup>a</sup> and Alexander O. Terent'ev<sup>\*a,c</sup>

<sup>a</sup> N. D. Zelinsky Institute of Organic Chemistry of the Russian Academy of Sciences  
47 Leninsky prosp., Moscow 119991, Russian Federation. E-mail: krylovigor@yandex.ru,  
terentev@ioc.ac.ru

<sup>b</sup> M. V. Lomonosov Moscow State University, 1 Leninskie Gory, Moscow 119991, Russian Federation

<sup>c</sup> D.I. Mendeleev University of Chemical Technology of Russia, 9 Miusskaya sq., Moscow 125047, Russian Federation.

## Table of contents

|                                                                                                         |    |
|---------------------------------------------------------------------------------------------------------|----|
| General .....                                                                                           | 3  |
| Cyclic voltammetry of diacetyliminoxyl radical, di- <i>tert</i> -butyliminoxyl radical, and TEMPO ..... | 4  |
| Experimental details and characterization data of synthesized compounds .....                           | 5  |
| The $^1\text{H}$ and $^{13}\text{C}$ spectra of synthesized compounds.....                              | 14 |

## General

In all experiments RT stands for 22-25 °C. <sup>1</sup>H and <sup>13</sup>C NMR spectra were recorded on a Bruker AVANCE II 300 and Bruker Fourier 300HD (300.13 MHz for <sup>1</sup>H and 75.47 MHz for <sup>13</sup>C, respectively) spectrometers in CDCl<sub>3</sub>. Chemical shifts were reported in parts per million(ppm), and the residual solvent peak was used as an internal reference: <sup>1</sup>H (CDCl<sub>3</sub> δ = 7.26 ppm), <sup>13</sup>C (CDCl<sub>3</sub> δ = 77.16 ppm). Multiplicity was indicated as follows: s (singlet), d (doublet), t (triplet), q (quartet), m (multiplet). Coupling constants were reported in Hertz (Hz).

Ethyl 2-methylacetoacetate 95%, iron(III) perchlorate hydrate reagent grade (Fe(ClO<sub>4</sub>)<sub>3</sub>·nH<sub>2</sub>O, Alfa Aesar, anhydrous basis purity ca. 65%), copper(II) hexafluoroacetylacetonate hydrate, copper(II) perchlorate hexahydrate 98%, copper(II) acetate 99%, nickel(II) acetate tetrahydrate 99%, cobalt(II) acetate tetrahydrate 98+%, cobalt(II) perchlorate hexahydrate 99%, manganese(II) acetate tetrahydrate 99%, manganese(III) acetate dihydrate 97%, BF<sub>3</sub>·Et<sub>2</sub>O, trifluoroacetic acid 99%, 4-dimethylaminopyridine 99%, 1,4-diazabicyclo[2.2.2]octane 97%, 2,6-lutidine 99%, potassium *tert*-butoxide 98+%, 2-acetylcyclopentanone 98%, 3-chloro-2,4-pentanedione 98% were used as is from commercial sources. CH<sub>2</sub>Cl<sub>2</sub>, DMSO, and pyridine were distilled prior to use. Glacial acetic acid was used as is from commercial sources. 3-Methylpentane-2,4-dione **1b**, 3-*n*-butylpentane-2,4-dione (for synthesis of copper complex **3d**), 3-benzylpentane-2,4-dione (for synthesis of copper complex **3c**), 2-methyl-1-phenylbutane-1,3-dione **1l**, 3-phenylpentane-2,4-dione **1m**, 2-methyl-1,3-diphenylpropane-1,3-dione **1n**, 2-benzyl-1,3-diphenylpropane-1,3-dione **1o**, ethyl 2-methyl-3-oxo-3-phenylpropanoate **1i**, ethyl 2-acetylpent-4-enoate **1j** and ethyl 2-benzyl-3-oxobutanoate **1k** were prepared as described in literature.<sup>1-8</sup> Anhydrous copper(II) hexafluoroacetylacetonate (Cu(hfacac)<sub>2</sub>) was prepared from corresponding hydrate according the literature.<sup>9</sup> Iron (III) and nickel (II) acetylacetonates were prepared according literature procedures.<sup>10,11</sup> Copper (II) complexes **4b-h** were prepared according literature procedures.<sup>12-17</sup> It should be noted that diacetylinoxyl radical is unstable in the neat state. Diacetylinoxyl solutions in CH<sub>2</sub>Cl<sub>2</sub> were prepared according published procedure<sup>8</sup>. To a stirred solution of diacetyl oxime (258 mg, 2 mmol) in 4 mL of CH<sub>2</sub>Cl<sub>2</sub> was added Pb(OAc)<sub>4</sub> (469 mg, 1.0 mmol) with vigorous stirring. Stirring was continued for 10 min, then the reaction mixture was chromatographed on silica gel using CH<sub>2</sub>Cl<sub>2</sub> as eluent. The fraction corresponding to the dark-red spot was collected, so that the volume of the fraction was 50 mL. For the reactions in Table 1 and Table 2 solutions were evaporated to an approximate volume of 15 mL. Transfer of diacetylinoxyl from CH<sub>2</sub>Cl<sub>2</sub> to DMSO was achieved by the addition of 15 mL of DMSO to a solution of the diacetylinoxyl in 50 mL of CH<sub>2</sub>Cl<sub>2</sub> followed by water-jet vacuum vacuum evaporation of the latter. A MeCN solution of diacetylinoxyl radical was prepared by threefold co-evaporation of the solution of diacetylinoxyl radical in 50 mL of CH<sub>2</sub>Cl<sub>2</sub> with acetonitrile (30 mL) to an approximate volume of 20 mL.

## Cyclic voltammetry of diacetylinoxyl radical, di-*tert*-butyliminoxyl radical, and TEMPO

Cyclic voltammetry (CV) was implemented on an IPC-Pro M computer-assisted potentiostat manufactured by Econix (scan rate error 1.0%; potential setting 0.25 mV; scan rate 100 mV/s). The experiments were performed in a 25 mL five-neck glass conic electrochemical cell with a water jacket for thermostating. CV curves (Fig. S1, S2) were recorded using a three-electrode scheme. The working electrode was a disc glassy-carbon electrode ( $d = 3$  mm). A platinum wire served as an auxiliary electrode. An Ag/AgNO<sub>3</sub> in 0.1M *n*-Bu<sub>4</sub>NBF<sub>4</sub>/MeCN electrode which was linked to the solution under study by a porous glass diaphragm was used as the reference electrode. The solutions were kept under thermally controlled conditions at 25±0.5 °C and deaerated by bubbling argon. The working electrode was polished before recording each CV curve. In a typical case, 20 mL of 0.1M Bu<sub>4</sub>NBF<sub>4</sub> solution in MeCN was utilized, the compound concentration was 0.05M. The initial potentials for di-*tert*-butyliminoxyl and diacetylinoxyl radicals were set at 700 mV, for TEMPO – 0 mV. All the CV curves are composed of two separately recorded parts (cathodic and anodic region) in order to avoid unwanted side oxidation and reduction reactions.

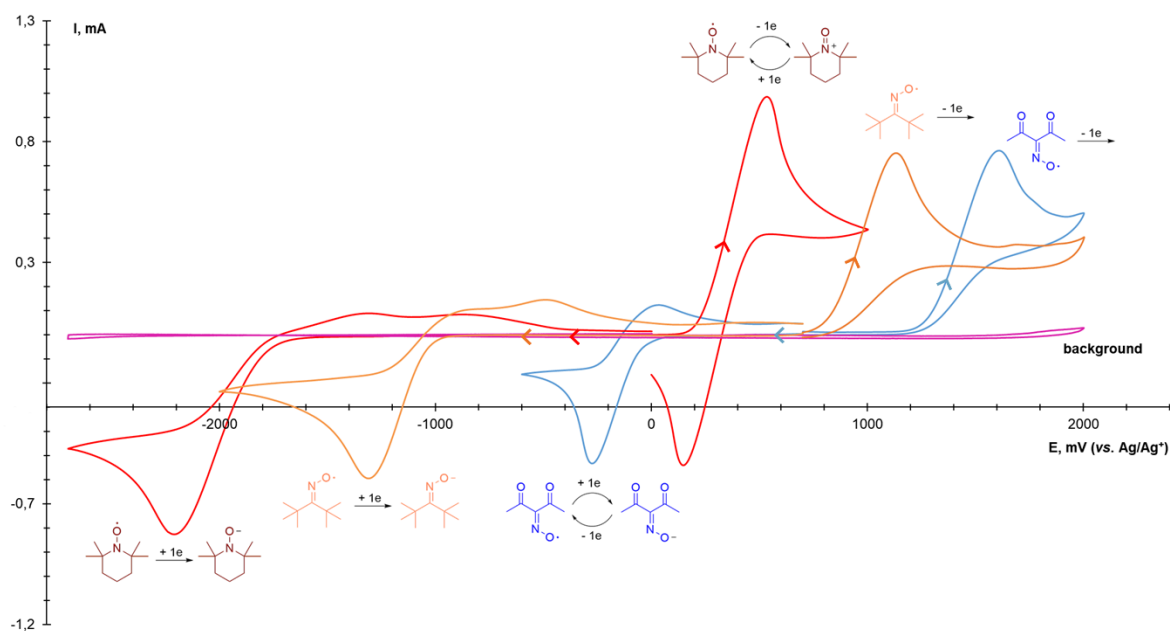

**Fig. S1** CV-curves of 0.05M solutions of diacetylinoxyl radical **2** (blue), di-*tert*-butyliminoxyl radical (orange) and TEMPO (red) in 0.1M Bu<sub>4</sub>NBF<sub>4</sub> solution in MeCN on a working glassy-carbon electrode ( $d = 3$  mm) under a scan rate of 0.1V/s at 298K.

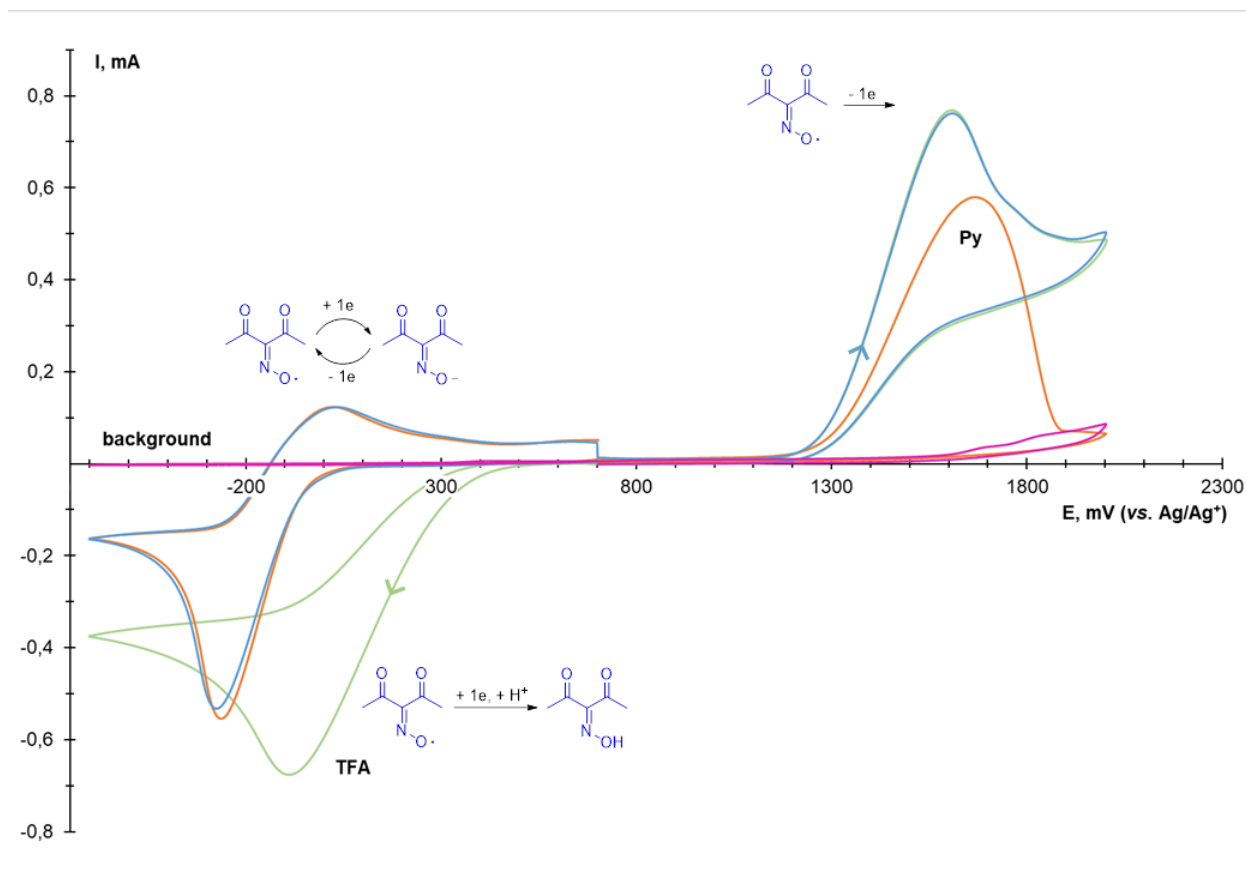

**Fig. S2.** CV-curves of 0.05M solutions of diacetylinoxyl radical **2** (blue), **2** with 2 eq of pyridine (orange), **2** with 2 eq of TFA (green) in 0.1M Bu<sub>4</sub>NBF<sub>4</sub> solution in MeCN on a working glassy-carbon electrode (d = 3 mm) under a scan rate of 0.1V/s at 298K.

## Experimental details and characterization data of synthesized compounds

<sup>1</sup>H and <sup>13</sup>C NMR spectra of the synthesized compounds **3a-e,j,k** were in agreement with the literature data.<sup>18,19</sup>

### Experimental details for Table 1.

Ethyl 2-methylacetoacetate **1a** (1 mmol, 144 mg) and an additive (0.5–1 mmol, 30–272 mg) were added to a stirred solution of diacetylinoxyl radical **2** (2 mmol) in a solvent (15 mL, CH<sub>2</sub>Cl<sub>2</sub> or DMSO) under air. The resulting solution was stirred at 23–25 °C for 24 hours. Then the reaction mixture was diluted with 0.05M solution (20 mL) of Na<sub>2</sub>S<sub>2</sub>O<sub>4</sub> and shaken. The organic layer was separated and washed with water (20 mL), dried over MgSO<sub>4</sub>, and rotary evaporated under water-jet vacuum. In the case of DMSO reaction mixture was diluted with CH<sub>2</sub>Cl<sub>2</sub> (10 mL), water (20 mL) and shaken. The organic layer was separated, and the aqueous layer was extracted with CH<sub>2</sub>Cl<sub>2</sub> (2×10 mL), and all organic extracts were combined. Organic extract was washed with 0.05M solution of Na<sub>2</sub>S<sub>2</sub>O<sub>4</sub> (20 mL), water (20 mL), dried over MgSO<sub>4</sub> and rotary

evaporated under water-jet vacuum. C–O coupling product **3a** was isolated by column chromatography on silica gel using the EtOAc/CH<sub>2</sub>Cl<sub>2</sub> = 1/40 eluent.

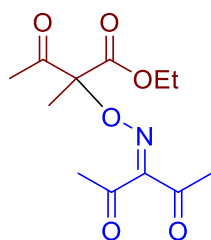

**Ethyl 2-(2,4-Dioxopentan-3-ylideneaminooxy)-2-methyl-3-oxobutanoate, 3a** was synthesized as colorless oil.<sup>18</sup> <sup>1</sup>H NMR (300.13 MHz, CDCl<sub>3</sub>): δ = 4.33–4.11 (m, 2H), 2.35 (s, 3H), 2.29 (s, 3H), 2.19 (s, 3H), 1.67 (s, 3H), 1.23 (t, *J* = 7.1 Hz, 3H). <sup>13</sup>C NMR (75.47 MHz, CDCl<sub>3</sub>): δ = 201.2, 197.5, 193.8, 167.5, 157.4, 91.6, 62.5, 30.5, 25.9, 25.7, 19.4, 14.2.

#### Experimental details for Table 2.

3-Methyl-2,4-pentanedione **1b** (1 mmol, 114 mg) and an additive (0.5–1 mmol, 57–239 mg) were added to a stirred solution of diacetylaminooxyl radical **2** (2 mmol) in a solvent (15 mL, CH<sub>2</sub>Cl<sub>2</sub> or DMSO) under air. The resulting solution was stirred at 23–25 °C for 24 hours. Then the reaction mixture was diluted with 0.05M solution (20 mL) of Na<sub>2</sub>S<sub>2</sub>O<sub>4</sub> and shaken. The organic layer was separated and washed with water (20 mL), dried over MgSO<sub>4</sub>, and rotary evaporated under water-jet vacuum. In the case of DMSO reaction mixture was diluted with CH<sub>2</sub>Cl<sub>2</sub> (10 mL), water (20 mL) and shaken. The organic layer was separated and the aqueous layer was extracted with CH<sub>2</sub>Cl<sub>2</sub> (2 × 10 mL), and all organic extracts were combined. Organic extract was washed with 20 mL 0.05M solution of Na<sub>2</sub>S<sub>2</sub>O<sub>4</sub>, water (20 mL), dried over MgSO<sub>4</sub> and rotary evaporated under water-jet vacuum. C–O coupling product **3b** was isolated by column chromatography on silica gel using the EtOAc/CH<sub>2</sub>Cl<sub>2</sub> = 1/40 eluent.

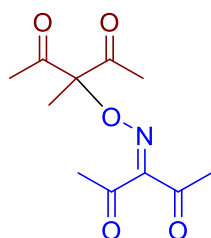

**3-(((2,4-Dioxopentan-3-ylidene)amino)oxy)-3-methylpentane-2,4-dione, 3b** was synthesized as yellow oil.<sup>19</sup> <sup>1</sup>H NMR (300.13 MHz, CDCl<sub>3</sub>): δ = 2.36 (s, 3H), 2.28 (s, 3H), 2.14 (s, 6H), 1.62 (s, 3H); <sup>13</sup>C NMR (75.47 MHz, CDCl<sub>3</sub>): δ = 201.9, 197.4, 193.6, 157.7, 96.5, 30.3, 26.0, 25.7, 19.0.

### Experimental details for Table 3.

M(Meacac)<sub>n</sub> **4b**, **4b'**, **4b''** (1 mmol, 284–395 mg) was added to a stirred solution of diacetyliminoxyl radical **2** (3 mmol) in CH<sub>2</sub>Cl<sub>2</sub> (50 mL). The resulting solution was stirred at 23–25 °C for 1 hour under air. Then the reaction mixture was diluted with 0.05M solution of Na<sub>2</sub>S<sub>2</sub>O<sub>4</sub> (50 mL) and shaken. The organic layer was separated and washed with water (20 mL), dried over MgSO<sub>4</sub>, and rotary evaporated under water-jet vacuum. Yields of **3b** were determined by <sup>1</sup>H NMR using 1,1,2,2-tetrachloroethane as an internal standard

### Experimental details for Table 4.

Cu(Racac)<sub>2</sub> **4b-h** (1 mmol, 261–441 mg) was added to a stirred solution of diacetyliminoxyl radical **2** (3 mmol) in CH<sub>2</sub>Cl<sub>2</sub> (50 mL). The resulting solution was stirred at 23–25 °C for 1 hour. Then the reaction mixture was diluted with 0.05M solution of Na<sub>2</sub>S<sub>2</sub>O<sub>4</sub> (50 mL) and shaken. The organic layer was separated and washed with water (20 mL), dried over MgSO<sub>4</sub>, and rotary evaporated under water-jet vacuum. C–O coupling products **3** were isolated by column chromatography on silica gel using the EtOAc/CH<sub>2</sub>Cl<sub>2</sub> = 1/40 eluent or PE/EtOAc = 4/1 (in case of **3g**).

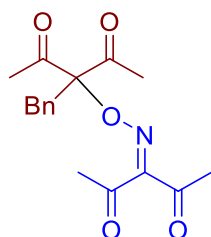

**3-Benzyl-3-(((2,4-dioxopentane-3-ylidene)amino)oxy)pentane-2,4-dione**, **3c** was synthesized as colorless oil.<sup>19</sup> <sup>1</sup>H NMR (300.13 MHz, CDCl<sub>3</sub>): δ = 7.36–7.18 (m, 3H), 7.09–6.95 (m, 2H), 3.51 (s, 2H), 2.40 (s, 3H), 2.26 (s, 3H), 2.02 (s, 6H). <sup>13</sup>C NMR (75.47 MHz, CDCl<sub>3</sub>): δ = 201.4, 197.3, 193.5, 158.1, 133.8, 130.2, 128.7, 127.6, 99.6, 39.1, 30.0, 27.4, 26.0.

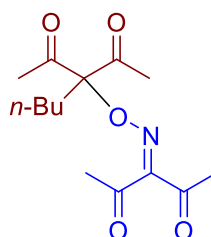

**3-Butyl-3-(((2,4-dioxopentane-3-ylidene)amino)oxy)pentane-2,4-dione**, **3d** was synthesized as colorless oil.<sup>18</sup> <sup>1</sup>H NMR (300.13 MHz, CDCl<sub>3</sub>): δ = 2.43 (s, 3H), 2.31 (s, 3H), 2.24–2.11 (m, 8H), 1.38–1.22 (m, 2H), 1.22–1.08 (m, 2H), 0.86 (t, J = 7.2 Hz, 3H). <sup>13</sup>C NMR (75.47 MHz, CDCl<sub>3</sub>): δ = 201.9, 197.7, 193.7, 157.7, 100.0, 32.9, 30.4, 27.0, 25.9, 25.2, 22.8, 13.8.

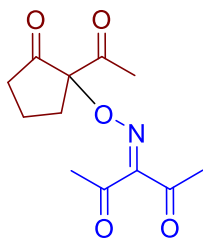

**3-(((1-Acetyl-2-oxocyclopentyl)oxy)imino)pentane-2,4-dione, 3e** was synthesized as colorless oil.<sup>18</sup>  $^1\text{H NMR}$  (300.13 MHz,  $\text{CDCl}_3$ ):  $\delta$  = 2.74–2.57 (m, 1H), 2.51–2.14 (m, 3H), 2.37 (s, 3H), 2.33 (s, 3H), 2.24 (s, 3H), 2.13–1.96 (m, 2H).  $^{13}\text{C NMR}$  (75.47 MHz,  $\text{CDCl}_3$ ):  $\delta$  = 209.3, 203.3, 197.3, 193.6, 157.9, 95.9, 37.0, 31.9, 30.6, 26.7, 25.9, 18.2.

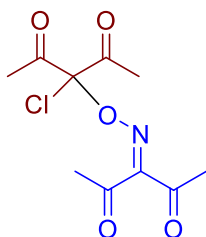

**3-Chloro-3-(((2,4-dioxopentan-3-ylidene)amino)oxy)pentane-2,4-dione, 3g** was synthesized as pale yellow oil.  $^1\text{H NMR}$  (300.13 MHz,  $\text{CDCl}_3$ ):  $\delta$  = 2.41 (s, 3H), 2.38 (s, 3H), 2.37 (s, 6H);  $^{13}\text{C NMR}$  (75.47 MHz,  $\text{CDCl}_3$ ):  $\delta$  = 195.9, 195.3, 193.0, 159.6, 101.6, 30.5, 26.2, 25.8. **FT-IR** (thin layer):  $\nu_{\text{max}}$  = 1752, 1731, 1702, 1361, 1221, 846. **HR-MS (ESI)**:  $m/z$  = 262.0485, 264.0456, calcd. for  $\text{C}_{10}\text{H}_{12}\text{ClNO}_5 + \text{H}^+$ : 262.0477, 264.0447.

#### Experimental details for Table 5.

Dicarbonyl compound **1** (1 mmol, 114–314 mg) and an additive (0.5 mmol, 57–239 mg, except for additive-free experiments) were added to a stirred solution of diacetyliminoxyl radical **2** (2 mmol) in  $\text{CH}_2\text{Cl}_2$  (15 mL). The resulting solution was stirred at 23–25 °C for 24 hours. Then the reaction mixture was diluted with 0.05M solution of  $\text{Na}_2\text{S}_2\text{O}_4$  (20 mL) and shaken. The organic layer was separated and washed with water (20 mL), dried over  $\text{MgSO}_4$ , and rotary evaporated under water-jet vacuum. C–O coupling products **3** were isolated by column chromatography on silica gel.



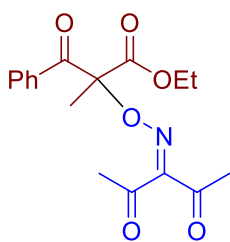

**Ethyl 2-(((2,4-dioxopent-3-ylidene)amino)oxy)-2-methyl-3-oxo-3-phenylpropanoate, 3i** was isolated by column chromatography (PE/EtOAc = 4/1 eluent) as pale yellow oil.  $^1\text{H NMR}$  (300.13 MHz,  $\text{CDCl}_3$ ):  $\delta$  = 7.98–7.85 (m, 2H), 7.59–7.47 (m, 1H), 7.46–7.35 (m, 2H), 4.22 (q,  $J$  = 7.1 Hz, 2H), 2.31 (s, 3H), 2.16 (s, 3H), 1.91 (s, 3H), 1.16 (t,  $J$  = 7.1 Hz, 3H);  $^{13}\text{C NMR}$  (75.47 MHz,  $\text{CDCl}_3$ ):  $\delta$  = 197.1, 193.7, 192.0, 168.3, 157.0, 133.9, 133.7, 129.4, 128.7, 90.7, 62.5, 30.5, 25.8, 21.0, 13.9; **FT-IR** (thin layer):  $\nu_{\text{max}}$  = 1754, 1727, 1694, 1598, 1448, 1364, 1274, 1237, 1115, 986, 957, 697. **HR-MS (ESI)**:  $m/z$  = 356.1105, calcd. for  $\text{C}_{17}\text{H}_{19}\text{NO}_6 + \text{Na}^+$ : 356.1105.

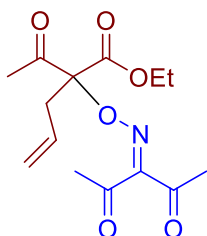

**Ethyl 2-acetyl-2-(((2,4-dioxopent-3-ylidene)amino)oxy)pent-4-enoate, 3j** was isolated by column chromatography (EtOAc/ $\text{CH}_2\text{Cl}_2$  = 1/40 eluent) as pale yellow oil.<sup>18</sup>  $^1\text{H NMR}$  (300.13 MHz,  $\text{CDCl}_3$ ):  $\delta$  = 5.71–5.43 (m, 1H), 5.19–4.97 (m, 2H), 4.20 (q,  $J$  = 7.2 Hz, 2H), 2.92 (d,  $J$  = 7.1 Hz, 2H), 2.35 (s, 3H), 2.29 (s, 3H), 2.16 (s, 3H), 1.22 (t,  $J$  = 7.2 Hz, 3H);  $^{13}\text{C NMR}$  (75.47 MHz,  $\text{CDCl}_3$ ):  $\delta$  = 200.7, 197.1, 193.5, 166.4, 157.4, 130.0, 120.5, 93.5, 62.4, 37.5, 30.3, 26.6, 25.8, 14.1.

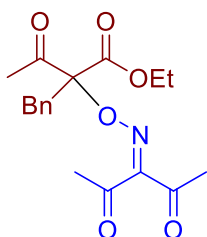

**Ethyl 2-benzyl-2-(((2,4-dioxopent-3-ylidene)amino)oxy)-3-oxobutanoate, 3k** was isolated by column chromatography (EtOAc/ $\text{CH}_2\text{Cl}_2$  = 1/40 eluent) as pale yellow oil.<sup>19</sup>  $^1\text{H NMR}$  (300.13 MHz,  $\text{CDCl}_3$ ):  $\delta$  = 7.25–7.15 (m, 3H), 7.09–6.98 (m, 2H), 4.30–4.10 (m, 2H), 3.51 (s, 2H), 2.34 (s, 3H), 2.18 (s, 3H), 2.00 (s, 3H), 1.21 (t,  $J$  = 7.1 Hz, 1H);  $^{13}\text{C NMR}$  (75.47 MHz,  $\text{CDCl}_3$ ):  $\delta$  = 201.4, 197.2, 193.5, 166.4, 157.4, 133.6, 130.3, 128.4, 127.4, 94.2, 62.4, 38.9, 30.0, 26.9, 25.8, 14.0.

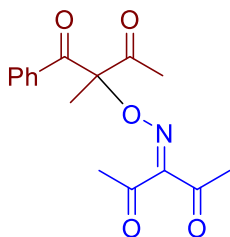

**3-(((2-Methyl-1,3-dioxo-1-phenylbutan-2-yl)oxy)imino)pentane-2,4-dione, 3l** was isolated by column chromatography (PE/EtOAc = 4/1 eluent) as pale yellow solid. Mp = 71–73 °C. **<sup>1</sup>H NMR** (300.13 MHz, CDCl<sub>3</sub>): δ = 7.88–7.78 (m, 2H), 7.59–7.49 (m, 1H), 7.48–7.37 (m, 2H), 2.30 (s, 3H), 2.28 (s, 3H), 2.17 (s, 3H), 1.86 (s, 3H); **<sup>13</sup>C NMR** (75.47 MHz, CDCl<sub>3</sub>): δ = 202.0, 197.4, 194.0, 193.7, 157.3, 134.0, 133.8, 129.5, 128.8, 96.3, 30.6, 26.0, 25.8, 20.6. **FT-IR** (thin layer): ν<sub>max</sub> = 1719, 1688, 1356, 1299, 1257, 1228, 1109, 971, 938, 700. **HR-MS (ESI):** *m/z* = 304.1180, calcd. for C<sub>16</sub>H<sub>17</sub>NO<sub>5</sub>+H<sup>+</sup>: 304.1179.

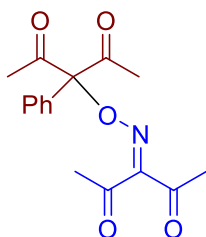

**3-(((2,4-Dioxopentane-3-ylidene)amino)oxy)-3-phenylpentane-2,4-dione, 3m** was isolated by column chromatography (PE/EtOAc = 4/1 eluent) as pale yellow solid. Mp = 139–140 °C. **<sup>1</sup>H NMR** (300.13 MHz, CDCl<sub>3</sub>): δ = 7.47–7.37 (m, 3H), 7.35–7.27 (m, 2H), 2.54 (s, 3H), 2.32 (s, 3H), 2.20 (s, 6H); **<sup>13</sup>C NMR** (75.47 MHz, CDCl<sub>3</sub>): δ = 201.2, 197.6, 193.8, 157.6, 132.4, 129.7, 129.3, 126.3, 98.3, 30.4, 27.2, 26.0. **FT-IR** (thin layer): ν<sub>max</sub> = 1737, 1721, 1691, 1354, 1298, 1210, 1198, 1176, 1049, 983, 931, 766, 702, 586. **HR-MS (ESI):** *m/z* = 304.1178, calcd. for C<sub>16</sub>H<sub>17</sub>NO<sub>5</sub>+H<sup>+</sup>: 304.1179.

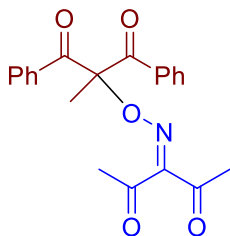

**3-(((2-Methyl-1,3-dioxo-1,3-diphenylpropan-2-yl)oxy)imino)pentane-2,4-dione, 3n** was isolated by column chromatography (PE/EtOAc = 4/1 eluent) as pale yellow oil. **<sup>1</sup>H NMR** (300.13 MHz, CDCl<sub>3</sub>): δ = 7.97–7.83 (m, 4H), 7.60–7.48 (m, 2H), 7.48–7.33 (m, 4H), 2.16 (s, 6H),

2.09 (s, 3H);  $^{13}\text{C}$  NMR (75.47 MHz,  $\text{CDCl}_3$ ):  $\delta$  = 197.4, 194.2, 193.6, 157.4, 133.9, 133.8, 129.8, 128.8, 95.8, 30.4, 25.8, 22.2. **FT-IR** (thin layer):  $\nu_{\text{max}}$  = 1726, 1703, 1597, 1366, 1273, 985, 970, 941, 697. **HR-MS (ESI)**:  $m/z$  = 388.1153, calcd. for  $\text{C}_{21}\text{H}_{19}\text{NO}_5 + \text{Na}^+$ : 388.1155.

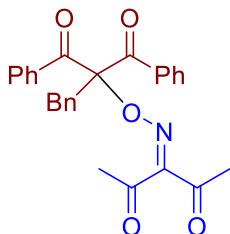

**3-(((2-Benzyl-1,3-dioxo-1,3-diphenylpropan-2-yl)oxy)imino)pentane-2,4-dione, 3o** was isolated by column chromatography (PE/EtOAc = 4/1 eluent) as pale yellow oil.  $^1\text{H}$  NMR (300.13 MHz,  $\text{CDCl}_3$ ):  $\delta$  = 7.57–7.43 (m, 6H), 7.35–7.16 (m, 7H), 7.13–7.00 (m, 2H), 3.91 (s, 2H), 2.16 (s, 3H), 2.09 (s, 3H);  $^{13}\text{C}$  NMR (75.47 MHz,  $\text{CDCl}_3$ ):  $\delta$  = 197.4, 194.0, 193.7, 157.3, 134.6, 134.1, 133.6, 131.0, 129.7, 128.7, 128.5, 127.6, 99.4, 41.7, 30.1, 26.0. **FT-IR** (thin layer):  $\nu_{\text{max}}$  = 1728, 1710, 1695, 1670, 1238, 936, 762, 693. **HR-MS (ESI)**:  $m/z$  = 442.1649, calcd. for  $\text{C}_{27}\text{H}_{23}\text{NO}_5 + \text{H}^+$ : 442.1649.

#### References:

- (1) Kalaitzakis, D.; Rozzell, J. D.; Smonou, I.; Kambourakis, S. Synthesis of Valuable Chiral Intermediates by Isolated Ketoreductases: Application in the Synthesis of  $\alpha$ -Alkyl- $\beta$ -Hydroxy Ketones and 1,3-Diols. *Adv. Synth. Catal.* **2006**, *348* (14), 1958–1969. <https://doi.org/10.1002/adsc.200606185>.
- (2) Thorat, K. G.; Kamble, P.; Mallah, R.; Ray, A. K.; Sekar, N. Congeners of Pyrromethene-567 Dye: Perspectives from Synthesis, Photophysics, Photostability, Laser, and TD-DFT Theory. *J. Org. Chem.* **2015**, *80* (12), 6152–6164. <https://doi.org/10.1021/acs.joc.5b00654>.
- (3) Bloomfield, J. Notes-Alkylation Reactions in Dimethyl Sulfoxide. *J. Org. Chem.* **1961**, *26* (10), 4112–4115. <https://doi.org/10.1021/jo01068a605>.
- (4) Jiang, Y.; Wu, N.; Wu, H.; He, M. An Efficient and Mild  $\text{CuI}/L$ -Proline-Catalyzed Arylation of Acetylacetone or Ethyl Cyanoacetate. *Synlett* **2005**, No. 18, 2731–2734. <https://doi.org/10.1055/s-2005-918921>.
- (5) Lee, H.-S.; Park, J.-S.; Kim, B. M.; Gellman, S. H. Efficient Synthesis of Enantiomerically Pure  $\beta^2$ -Amino Acids via Chiral Isoxazolidinones. *J. Org. Chem.* **2003**, *68* (4), 1575–1578. <https://doi.org/10.1021/jo026738b>.

- (6) He, Z.; Li, H.; Li, Z. Iodine-Mediated Synthesis of 3 *H*-Indoles via Intramolecular Cyclization of Enamines. *J. Org. Chem.* **2010**, *75* (13), 4636–4639. <https://doi.org/10.1021/jo100796s>.
- (7) Gogoi, P.; Kotipalli, T.; Indukuri, K.; Bondalapati, S.; Saha, P.; Saikia, A. K. Application of a Novel 1,3-Diol with a Benzyl Backbone as Chiral Ligand for Asymmetric Oxidation of Sulfides to Sulfoxides. *Tetrahedron Lett.* **2012**, *53* (22), 2726–2729. <https://doi.org/10.1016/j.tetlet.2012.03.077>.
- (8) Krylov, I. B.; Paveliev, S. A.; Shelimov, B. N.; Lokshin, B. V.; Garbuzova, I. A.; Tafeenko, V. A.; Chernyshev, V. V.; Budnikov, A. S.; Nikishin, G. I.; Terent'ev, A. O. Selective Cross-Dehydrogenative C–O Coupling of N-Hydroxy Compounds with Pyrazolones. Introduction of the Diacetylinoxyl Radical into the Practice of Organic Synthesis. *Org. Chem. Front.* **2017**, *4* (10), 1947–1957. <https://doi.org/10.1039/C7QO00447H>.
- (9) Petrova, L. A.; Borisov, A. P.; Aleshin, V. V.; Makhaev, V. D. Solid-Phase Synthesis of Copper (II) Beta-Diketonates upon Mechanical Activation. *Russ. J. Inorg. Chem.* **2001**, *46* (10), 1501–1506.
- (10) Yamada, T.; Takai, T.; Rhode, O.; Mukaiyama, T. Direct Epoxidation of Olefins Catalyzed by Nickel(II) Complexes with Molecular Oxygen and Aldehydes. *Bull. Chem. Soc. Jpn.* **1991**, *64* (7), 2109–2117. <https://doi.org/10.1246/bcsj.64.2109>.
- (11) Dinkar, S.; Maheshbai, M. P.; Dhanabalan, A. Moisture Curable Composition of a Polymer Having Silyl Groups. WO2013070227A1.
- (12) Ebraheem, K. A. K.; Hamdi, S. T.; Khalaf, M. N. *Canad. J. Spectrosc.* **1983**, No. 28, 9.
- (13) Patel, K. S.; Woods, J. A. O. Preparation and Physico-Chemical Studies of Some 3-Substituted-2,4-Pentanedionato Copper(II) Complexes and Their Adducts. *Synth. React. Inorg. Met.-Org. Chem.* **1990**, *20* (1), 97–109. <https://doi.org/10.1080/00945719008049873>.
- (14) Patel, K. S.; Woods, J. A. O. Preparation and Physico-Chemical Studies of Some 3-Substituted-2,4-Pentanedionato Copper(II) Complexes and Their Adducts. *Synth. React. Inorg. Met.-Org. Chem.* **1990**, *20* (1), 97–109. <https://doi.org/10.1080/00945719008049873>.
- (15) Patel, K. S.; Woods, J. A. O. Synthesis and Physico-Chemical Properties of Bis(3-Alkyl-2,4-Pentanedionato) Copper(II) Complexes and Their Adducts with 2,2'-Bipyridine and 1,10-Phenanthroline. *Synth. React. Inorg. Met.-Org. Chem.* **1990**, *20* (7), 909–922. <https://doi.org/10.1080/00945719008048184>.
- (16) Ribeiro Da Silva, M. A. V.; Ferrão, M. L. C. C. H.; Monte, M. J. S.; Esteves Da Silva, R. M. G.; Ribeiro, J. C. Standard Enthalpies of Formation of 3-Methylpentane-2,4-Dione and of Bis(3-Methylpentane-2,4-Dionato)Copper(II): The Mean (CuO) Bond-Dissociation Enthalpy. *J. Chem. Thermodyn.* **1992**, *24* (6), 585–594. [https://doi.org/10.1016/S0021-9614\(05\)80028-X](https://doi.org/10.1016/S0021-9614(05)80028-X).

- (17) Muena, J. P.; Villagrán, M.; Costamagna, J.; Aguirre, M. J. Dinaphthotetraaza[14]Annulene Copper(II) Complexes in the Electrocatalytic Reduction of Carbon Dioxide and Bisulfite Anion. *J. Coord. Chem.* **2008**, *61* (4), 479–489. <https://doi.org/10.1080/00958970701370559>.
- (18) Krylov, I. B.; Terent'ev, A. O.; Timofeev, V. P.; Shelimov, B. N.; Novikov, R. A.; Merkulova, V. M.; Nikishin, G. I. Iminoxyl Radical-Based Strategy for Intermolecular C–O Bond Formation: Cross-Dehydrogenative Coupling of 1,3-Dicarbonyl Compounds with Oximes. *Adv. Synth. Catal.* **2014**, *356* (10), 2266–2280. <https://doi.org/10.1002/adsc.201400143>.
- (19) Krylov, I. B.; Paveliev, S. A.; Shumakova, N. S.; Syroeshkin, M. A.; Shelimov, B. N.; Nikishin, G. I.; Terent'ev, A. O. Iminoxyl Radicals vs. *Tert*-Butylperoxyl Radical in Competitive Oxidative C–O Coupling with  $\beta$ -Dicarbonyl Compounds. Oxime Ether Formation Prevails over Kharasch Peroxidation. *RSC Adv.* **2018**, *8* (11), 5670–5677. <https://doi.org/10.1039/C7RA13587D>.

# The $^1\text{H}$ and $^{13}\text{C}$ spectra of synthesized compounds

<sup>1</sup>H NMR (300.13 MHz, CDCl<sub>3</sub>)

Ethyl 2-(2,4-dioxopentan-3-ylideneaminoxy)-2-methyl-3-oxobutanoate, 3a

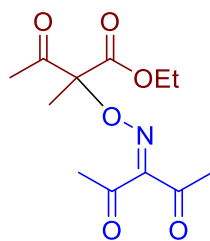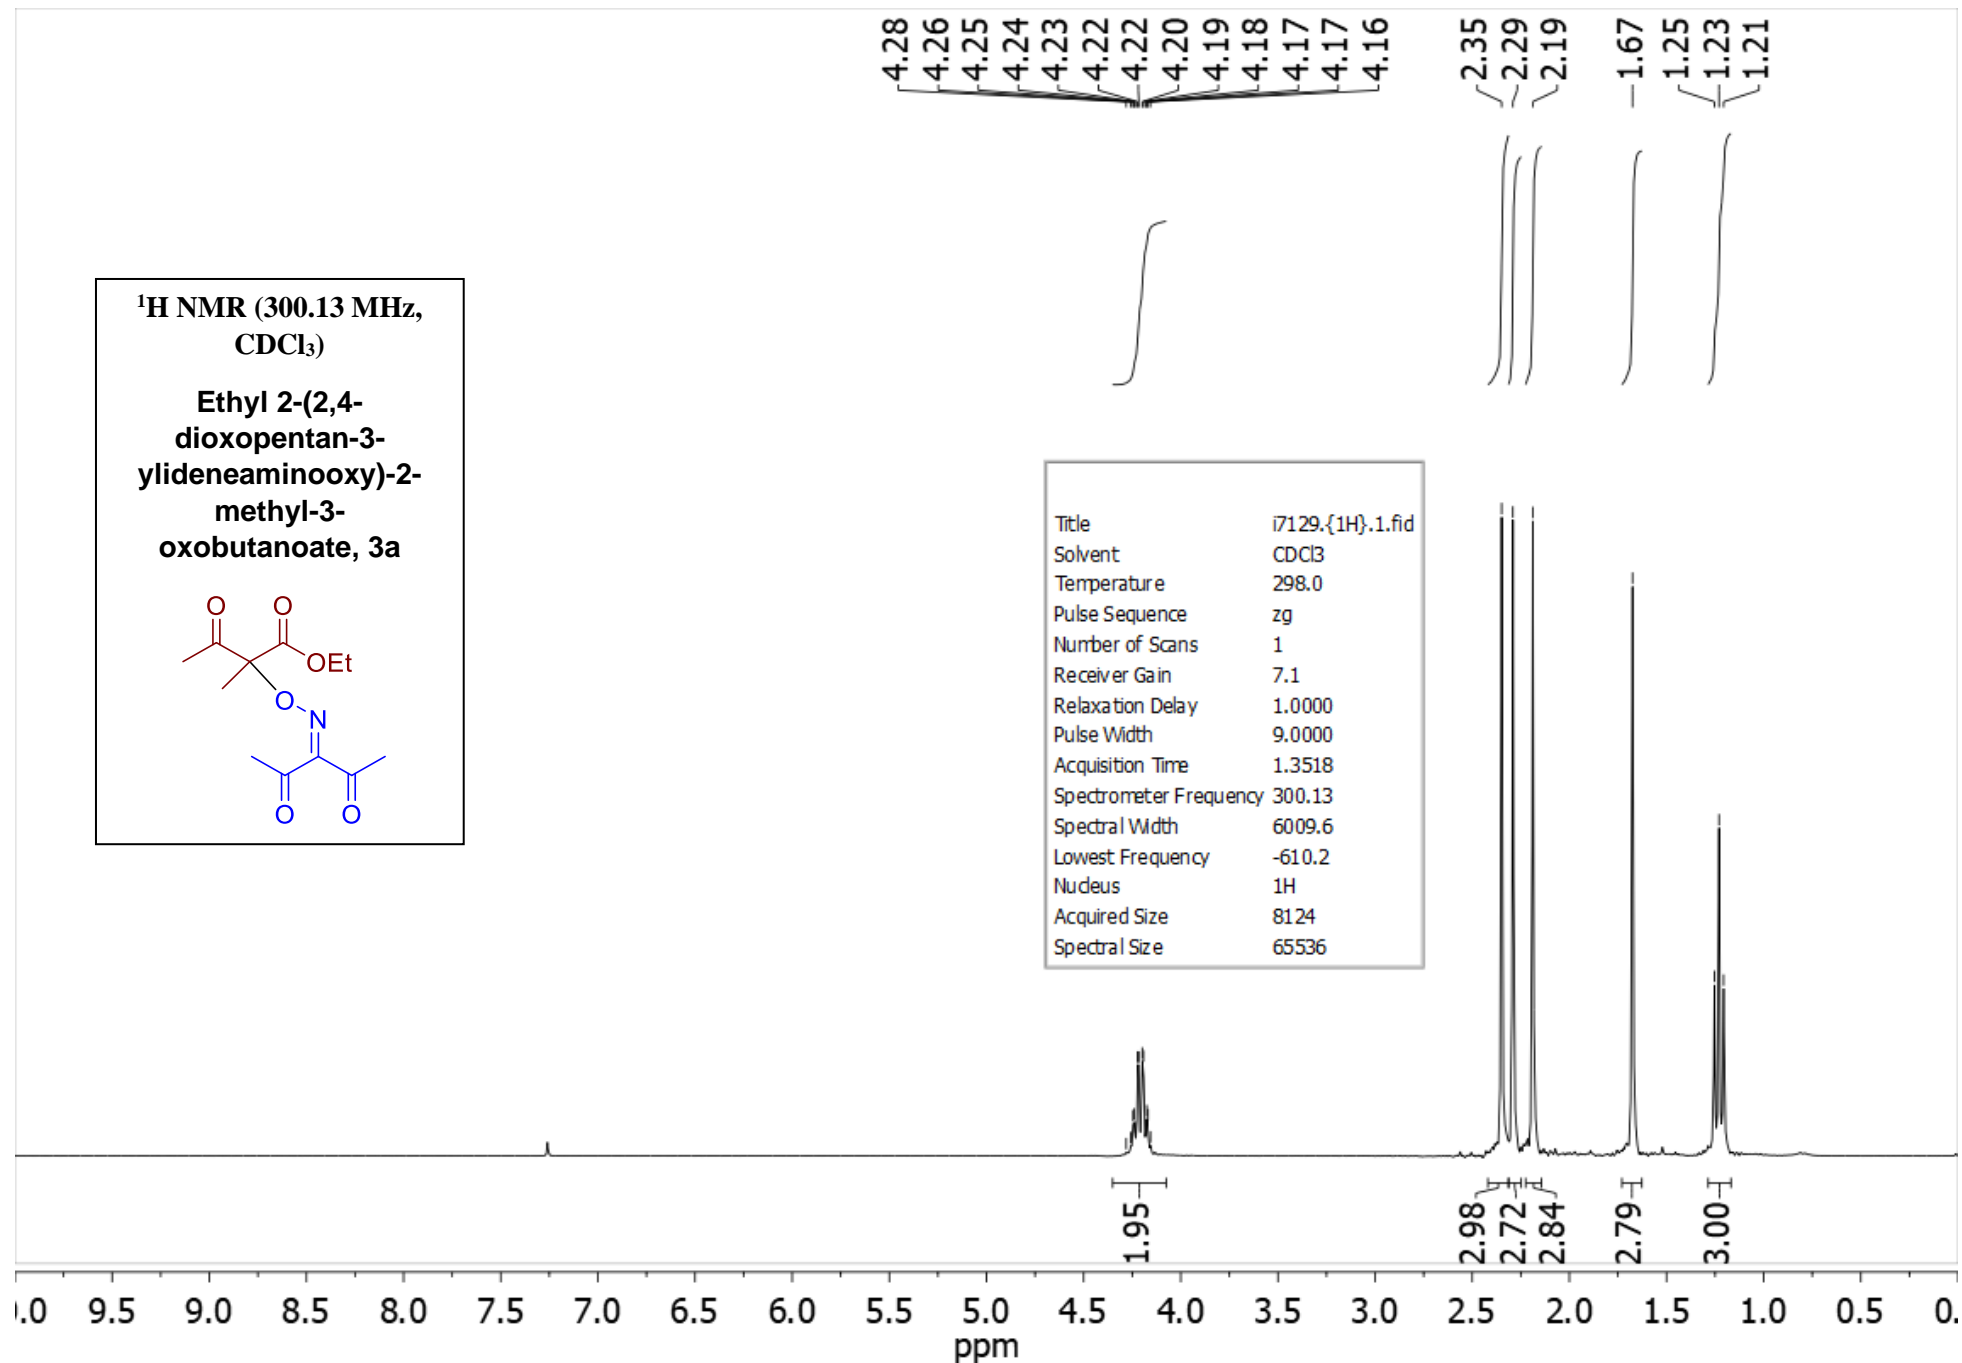

|                        |                   |
|------------------------|-------------------|
| Title                  | 7129.{1H}.1.fid   |
| Solvent                | CDCl <sub>3</sub> |
| Temperature            | 298.0             |
| Pulse Sequence         | zg                |
| Number of Scans        | 1                 |
| Receiver Gain          | 7.1               |
| Relaxation Delay       | 1.0000            |
| Pulse Width            | 9.0000            |
| Acquisition Time       | 1.3518            |
| Spectrometer Frequency | 300.13            |
| Spectral Width         | 6009.6            |
| Lowest Frequency       | -610.2            |
| Nucleus                | <sup>1</sup> H    |
| Acquired Size          | 8124              |
| Spectral Size          | 65536             |

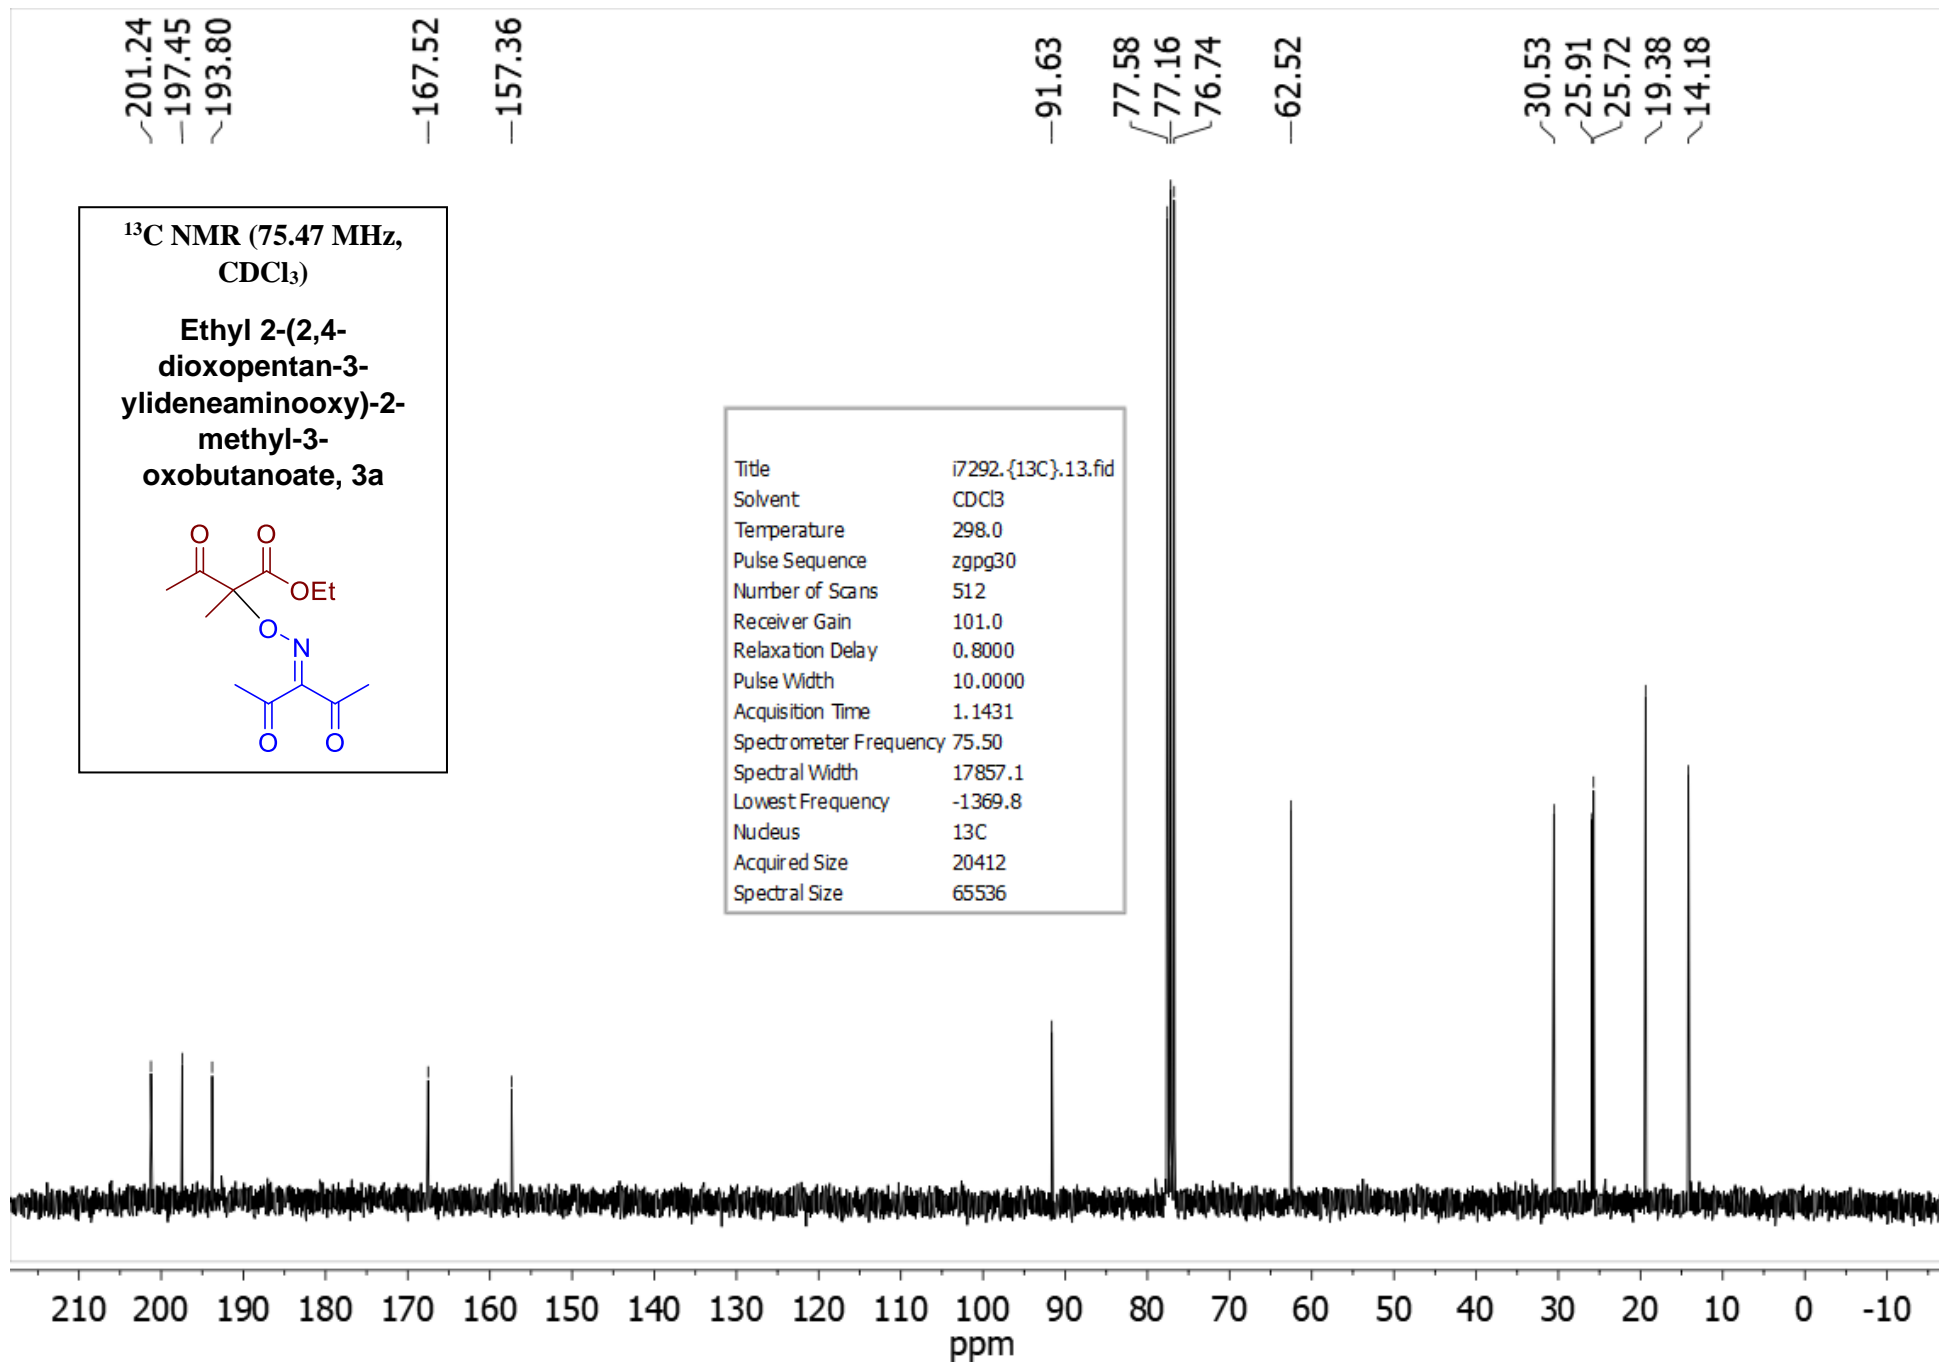



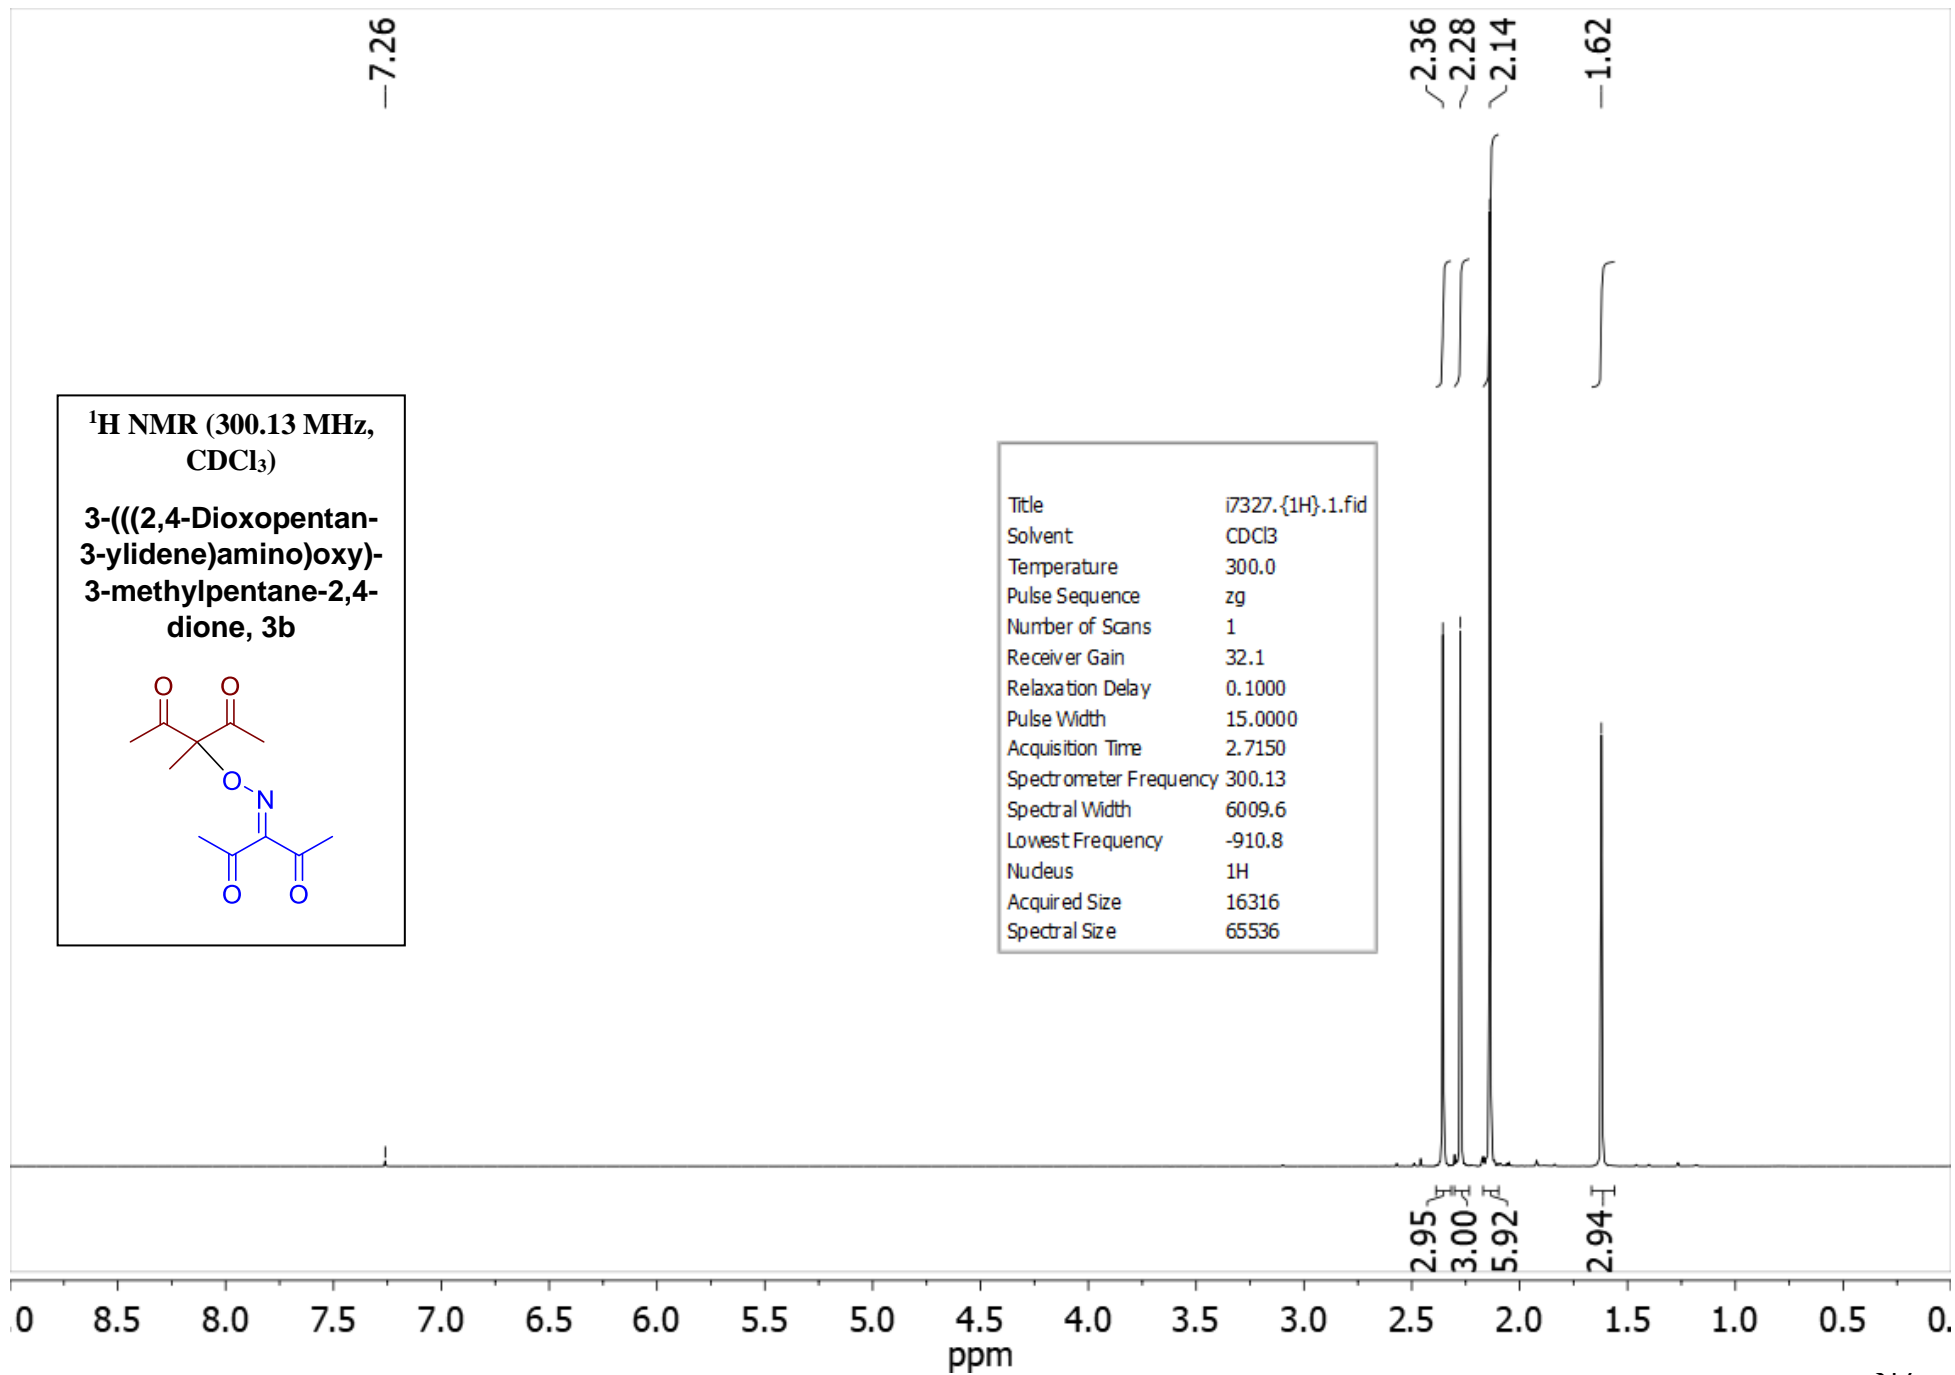

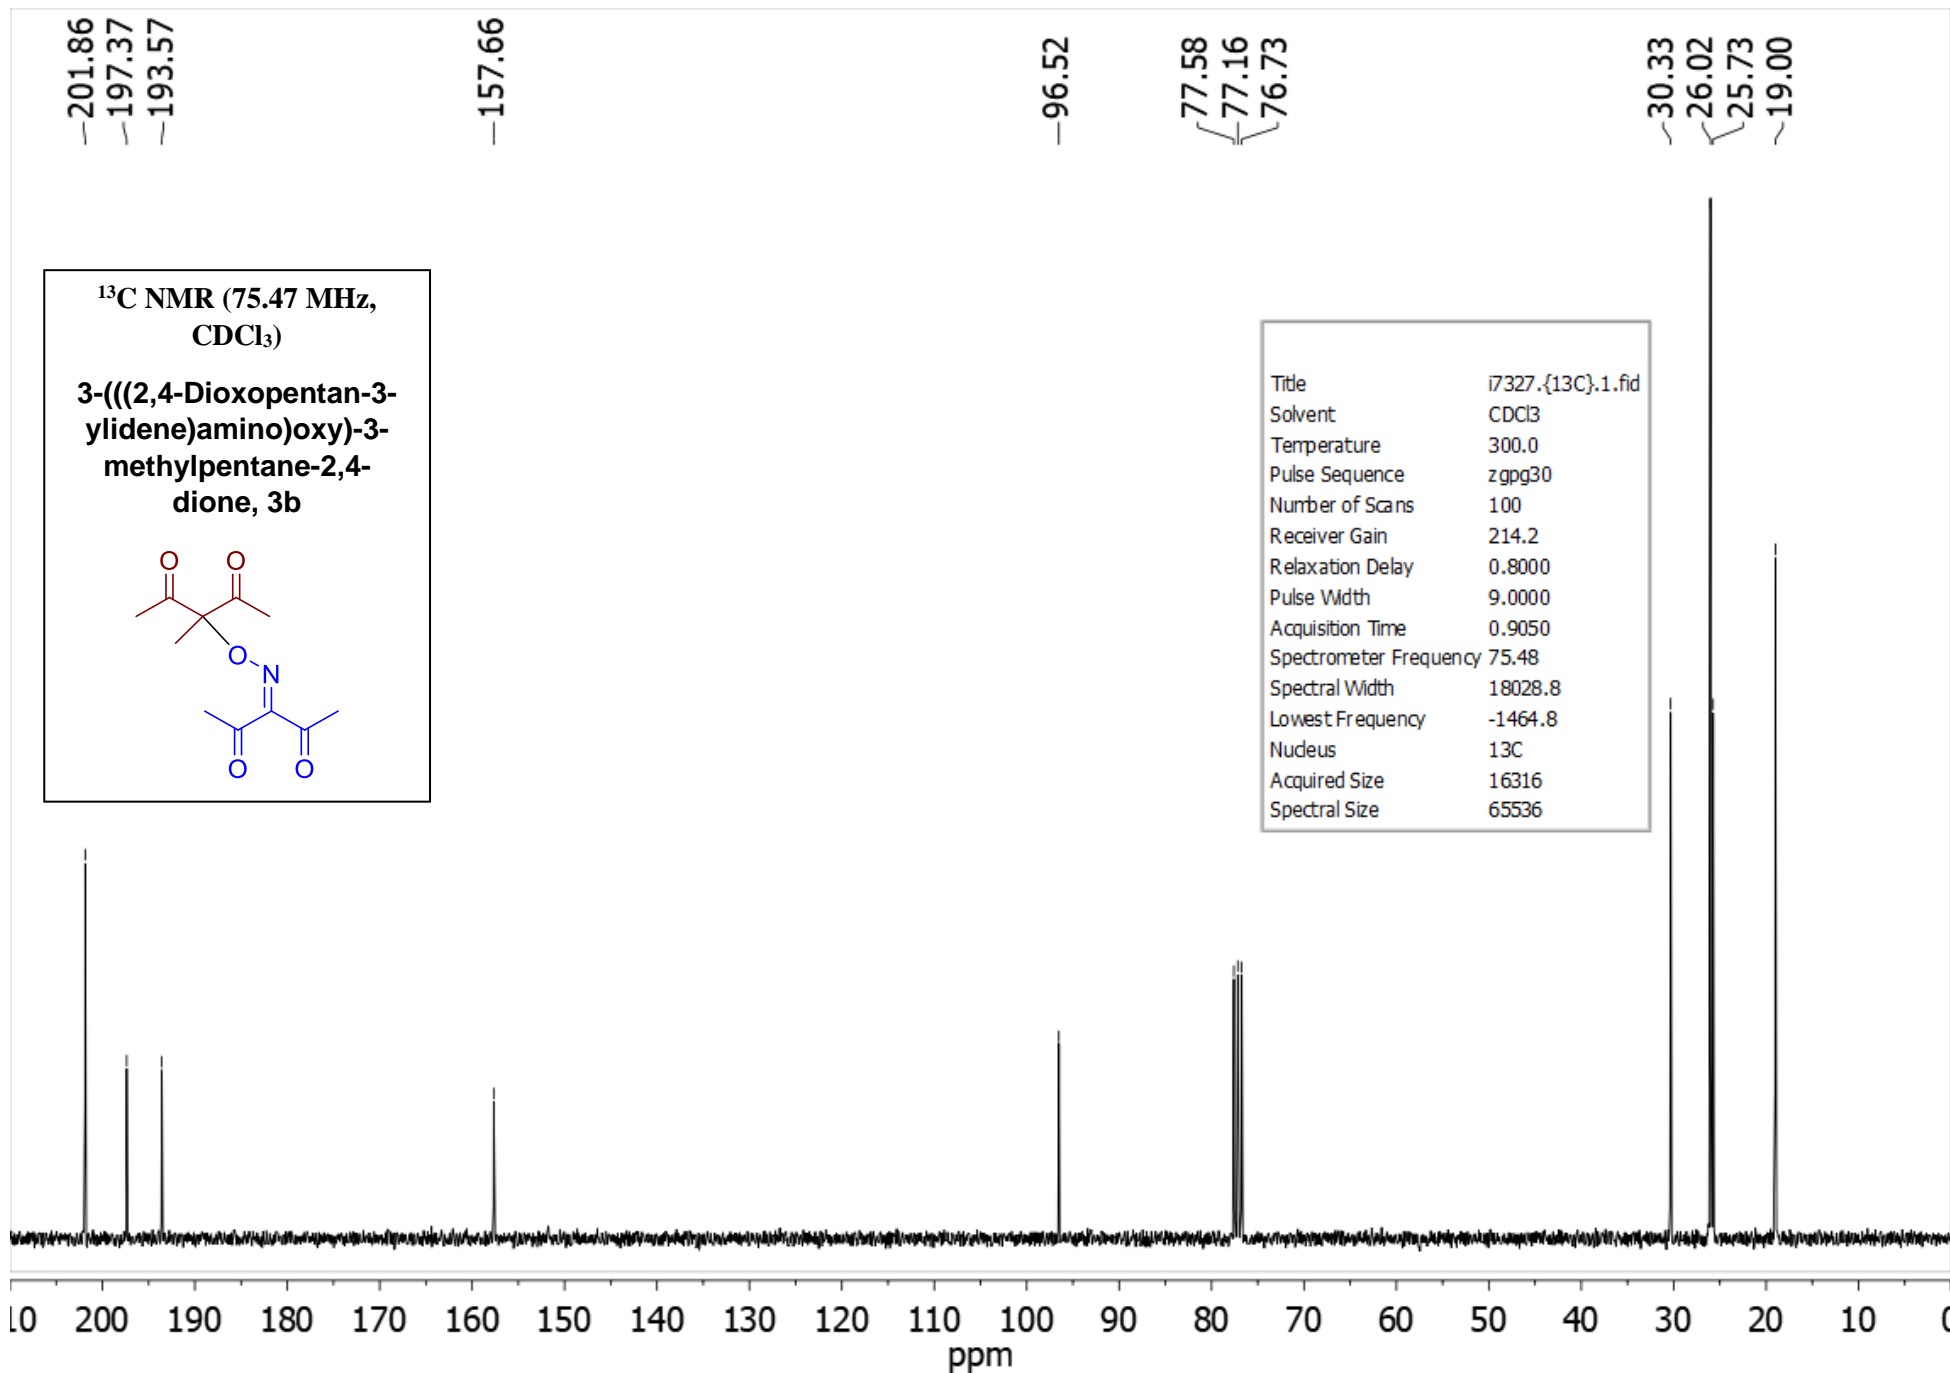

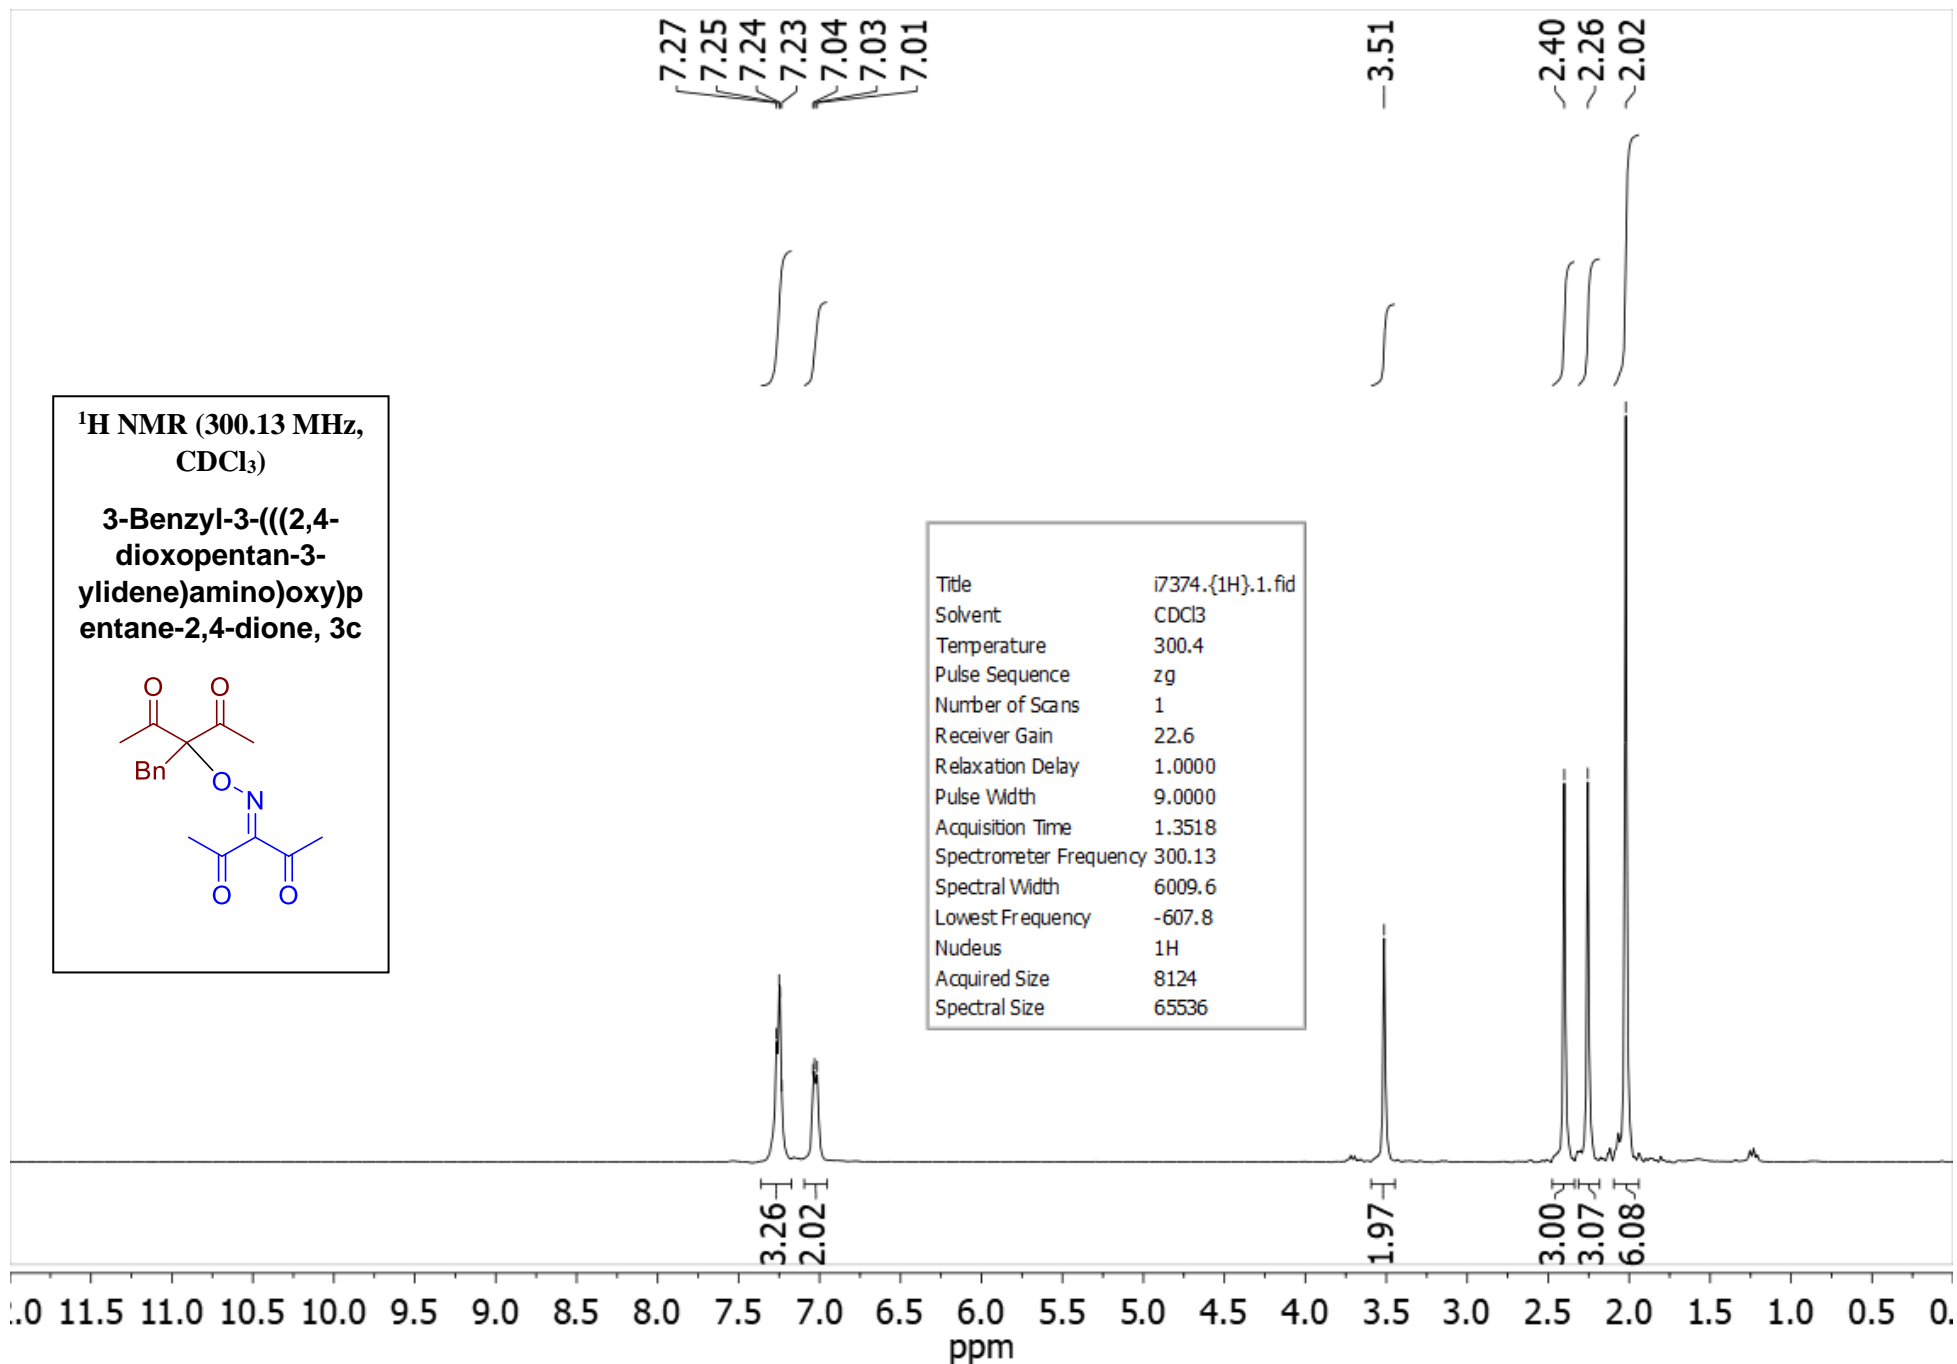

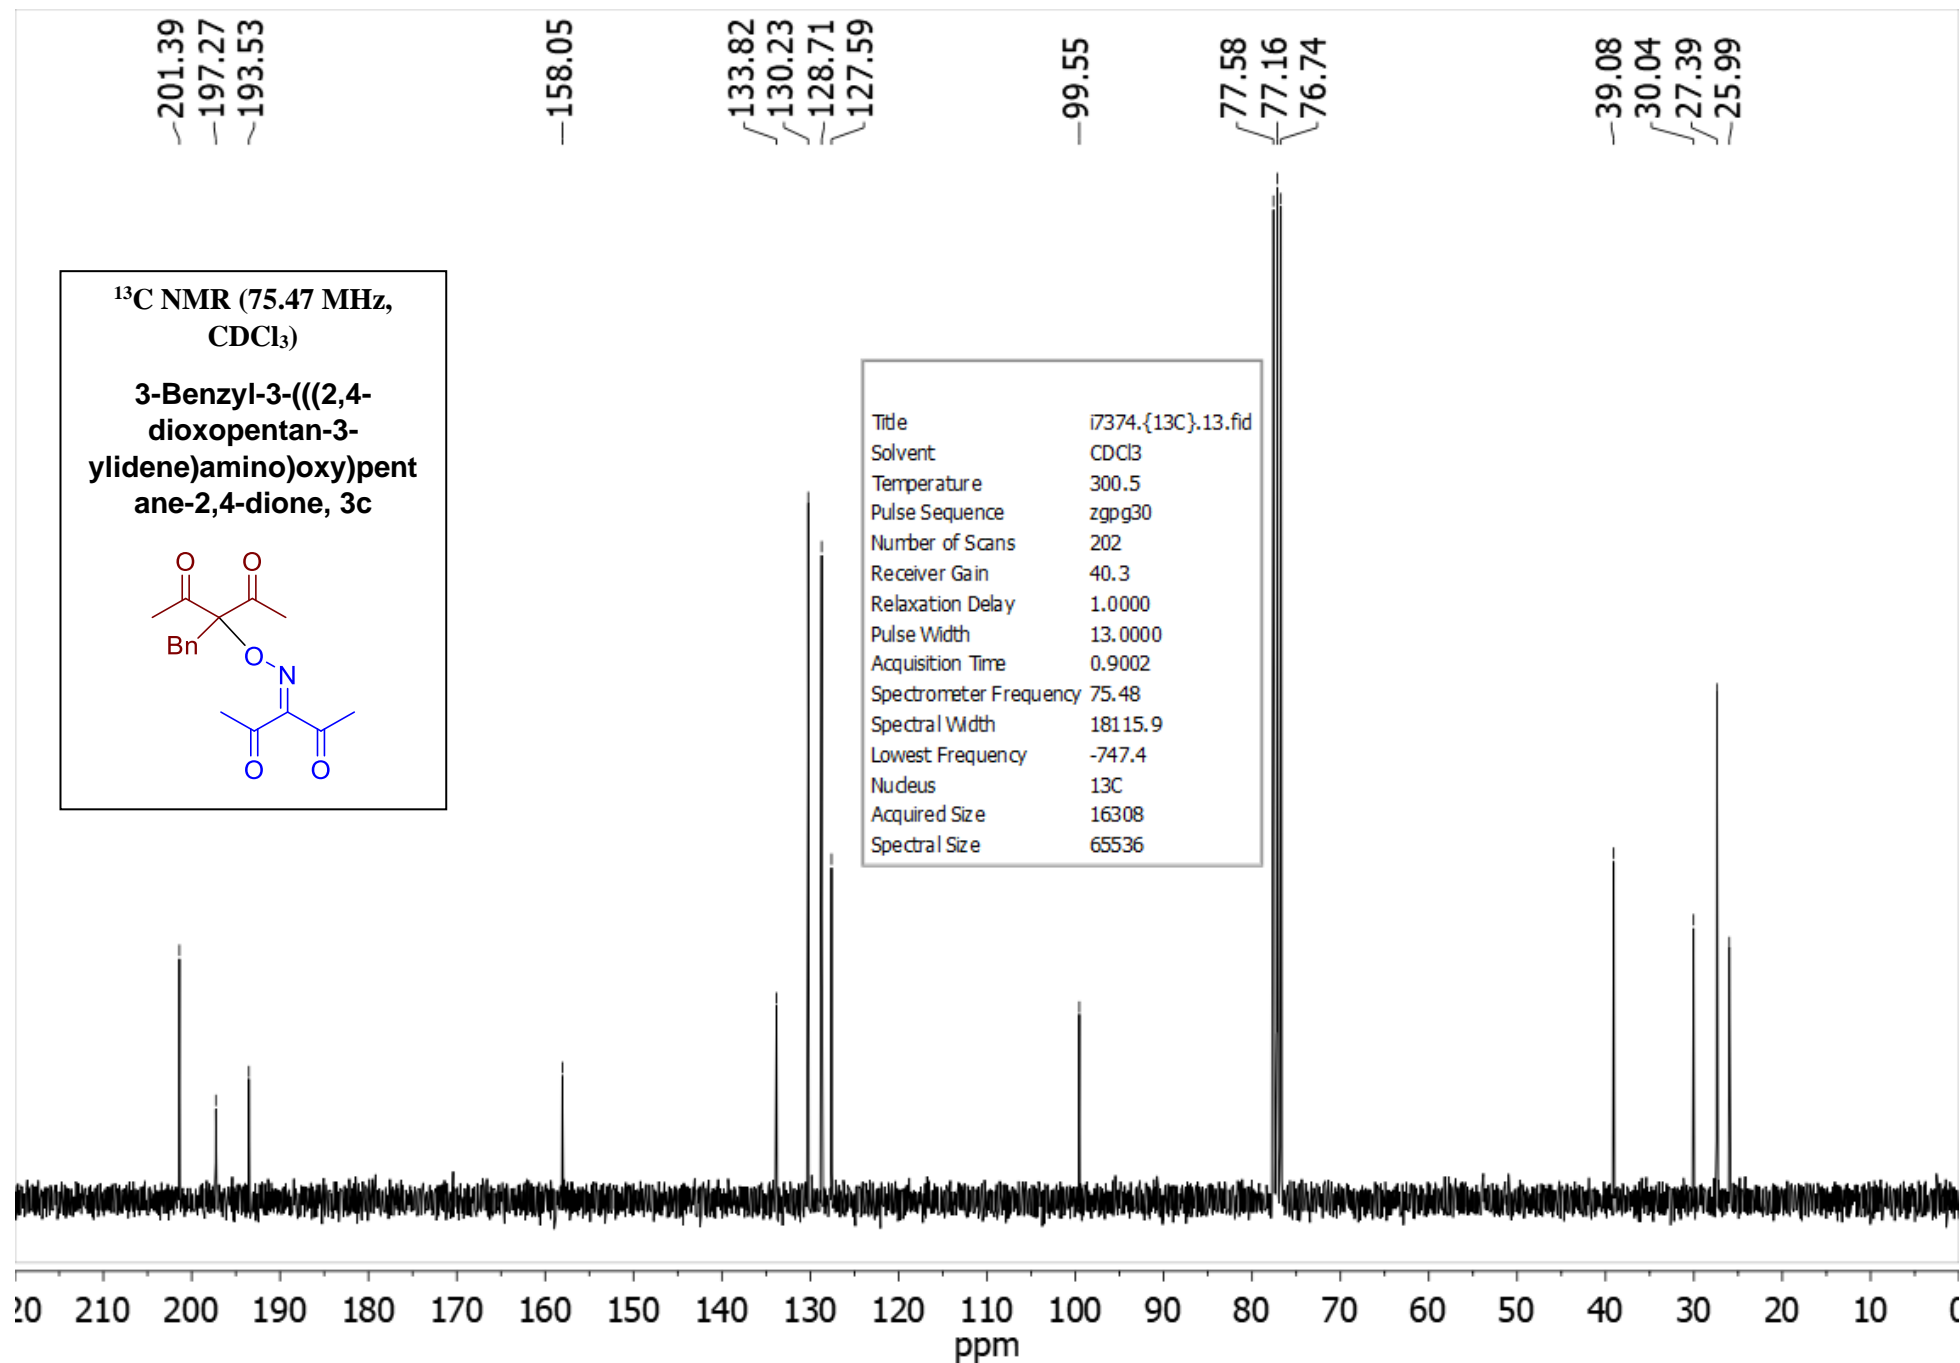

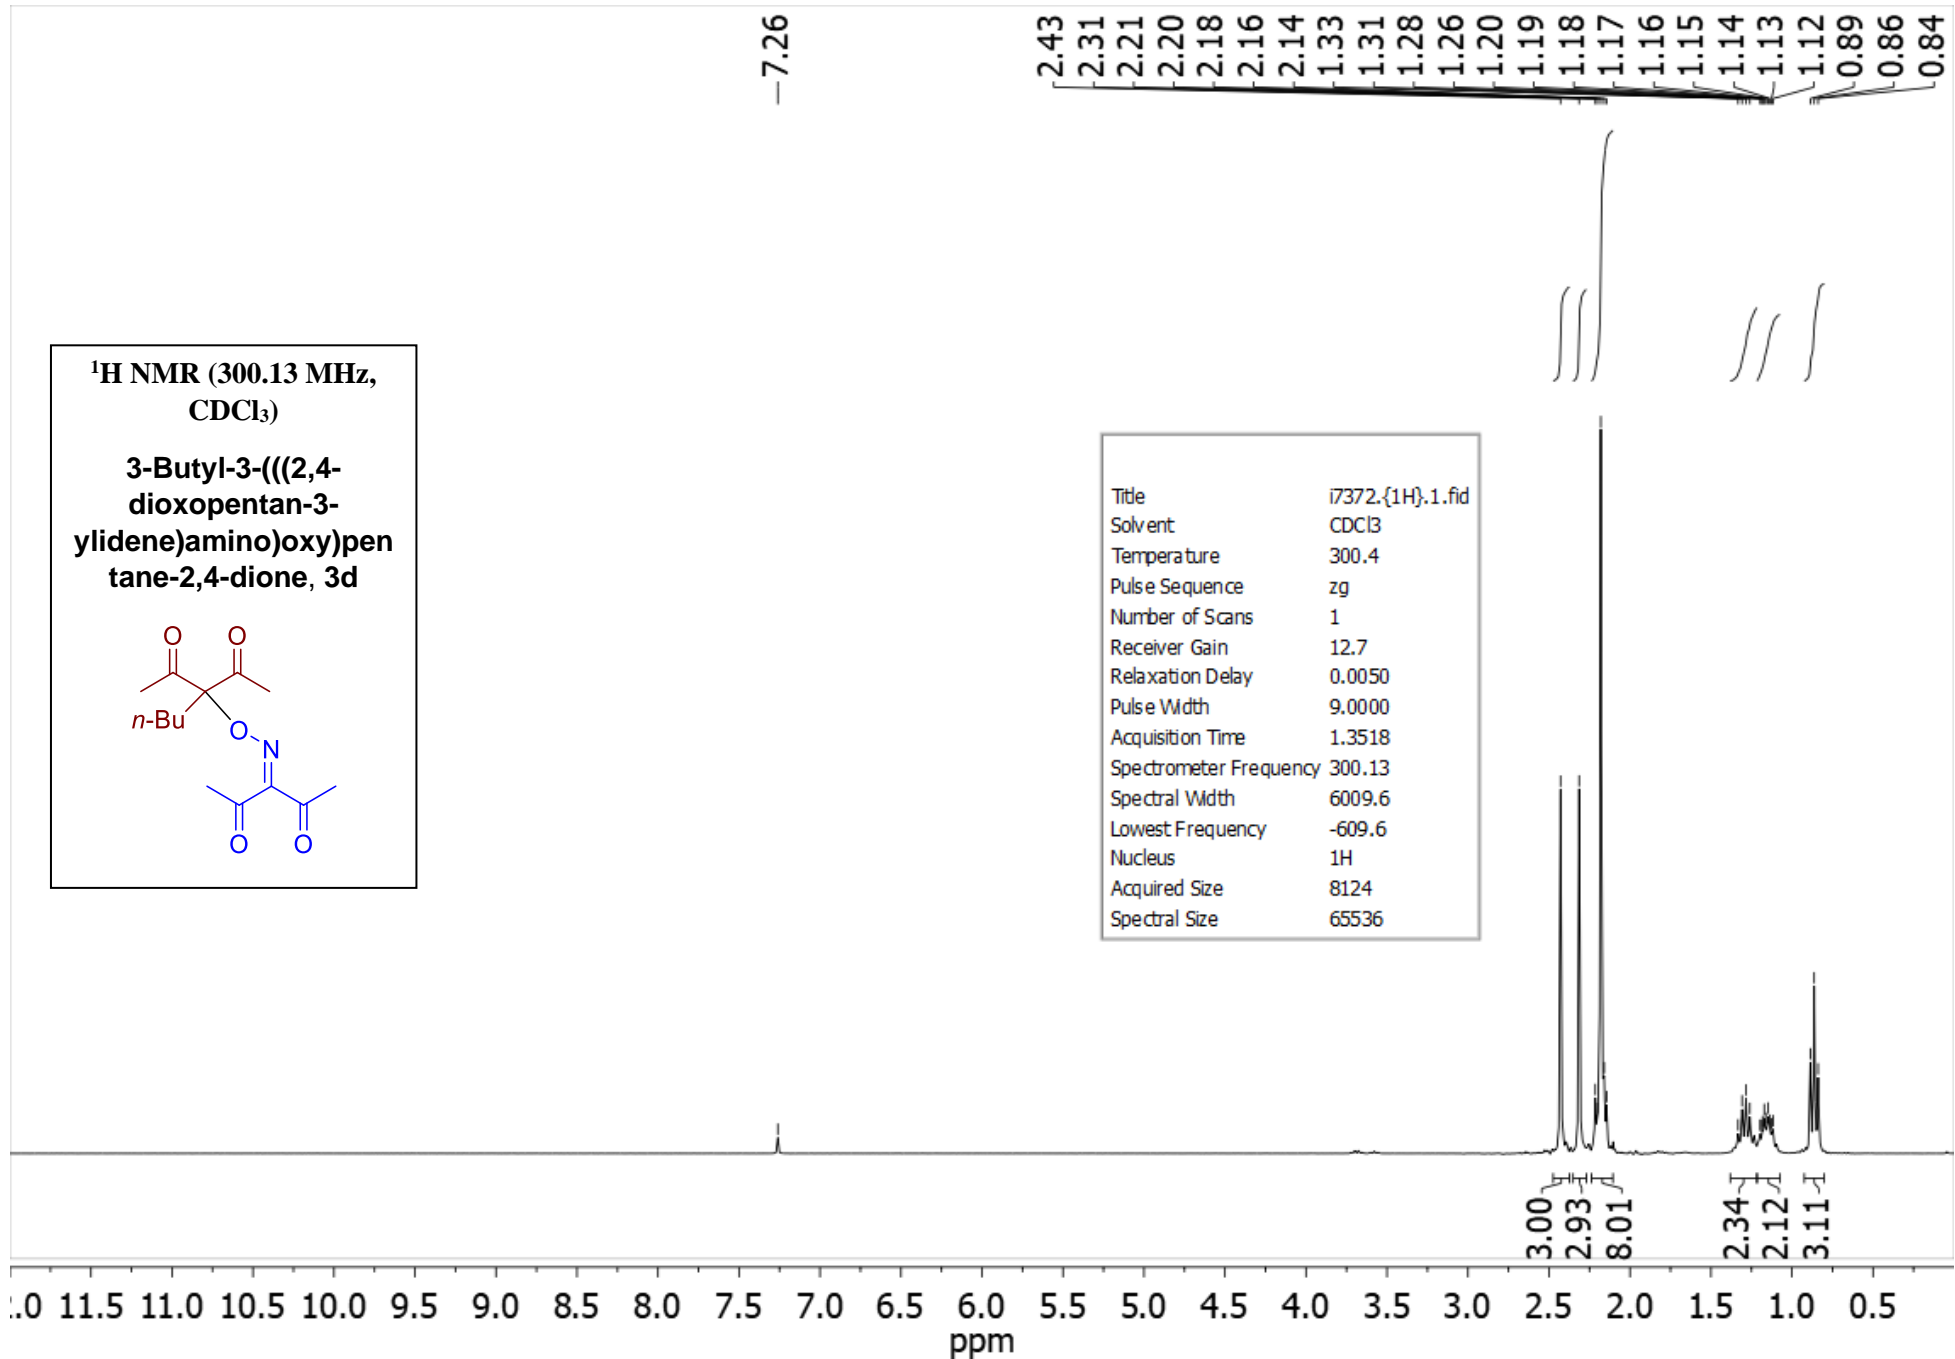

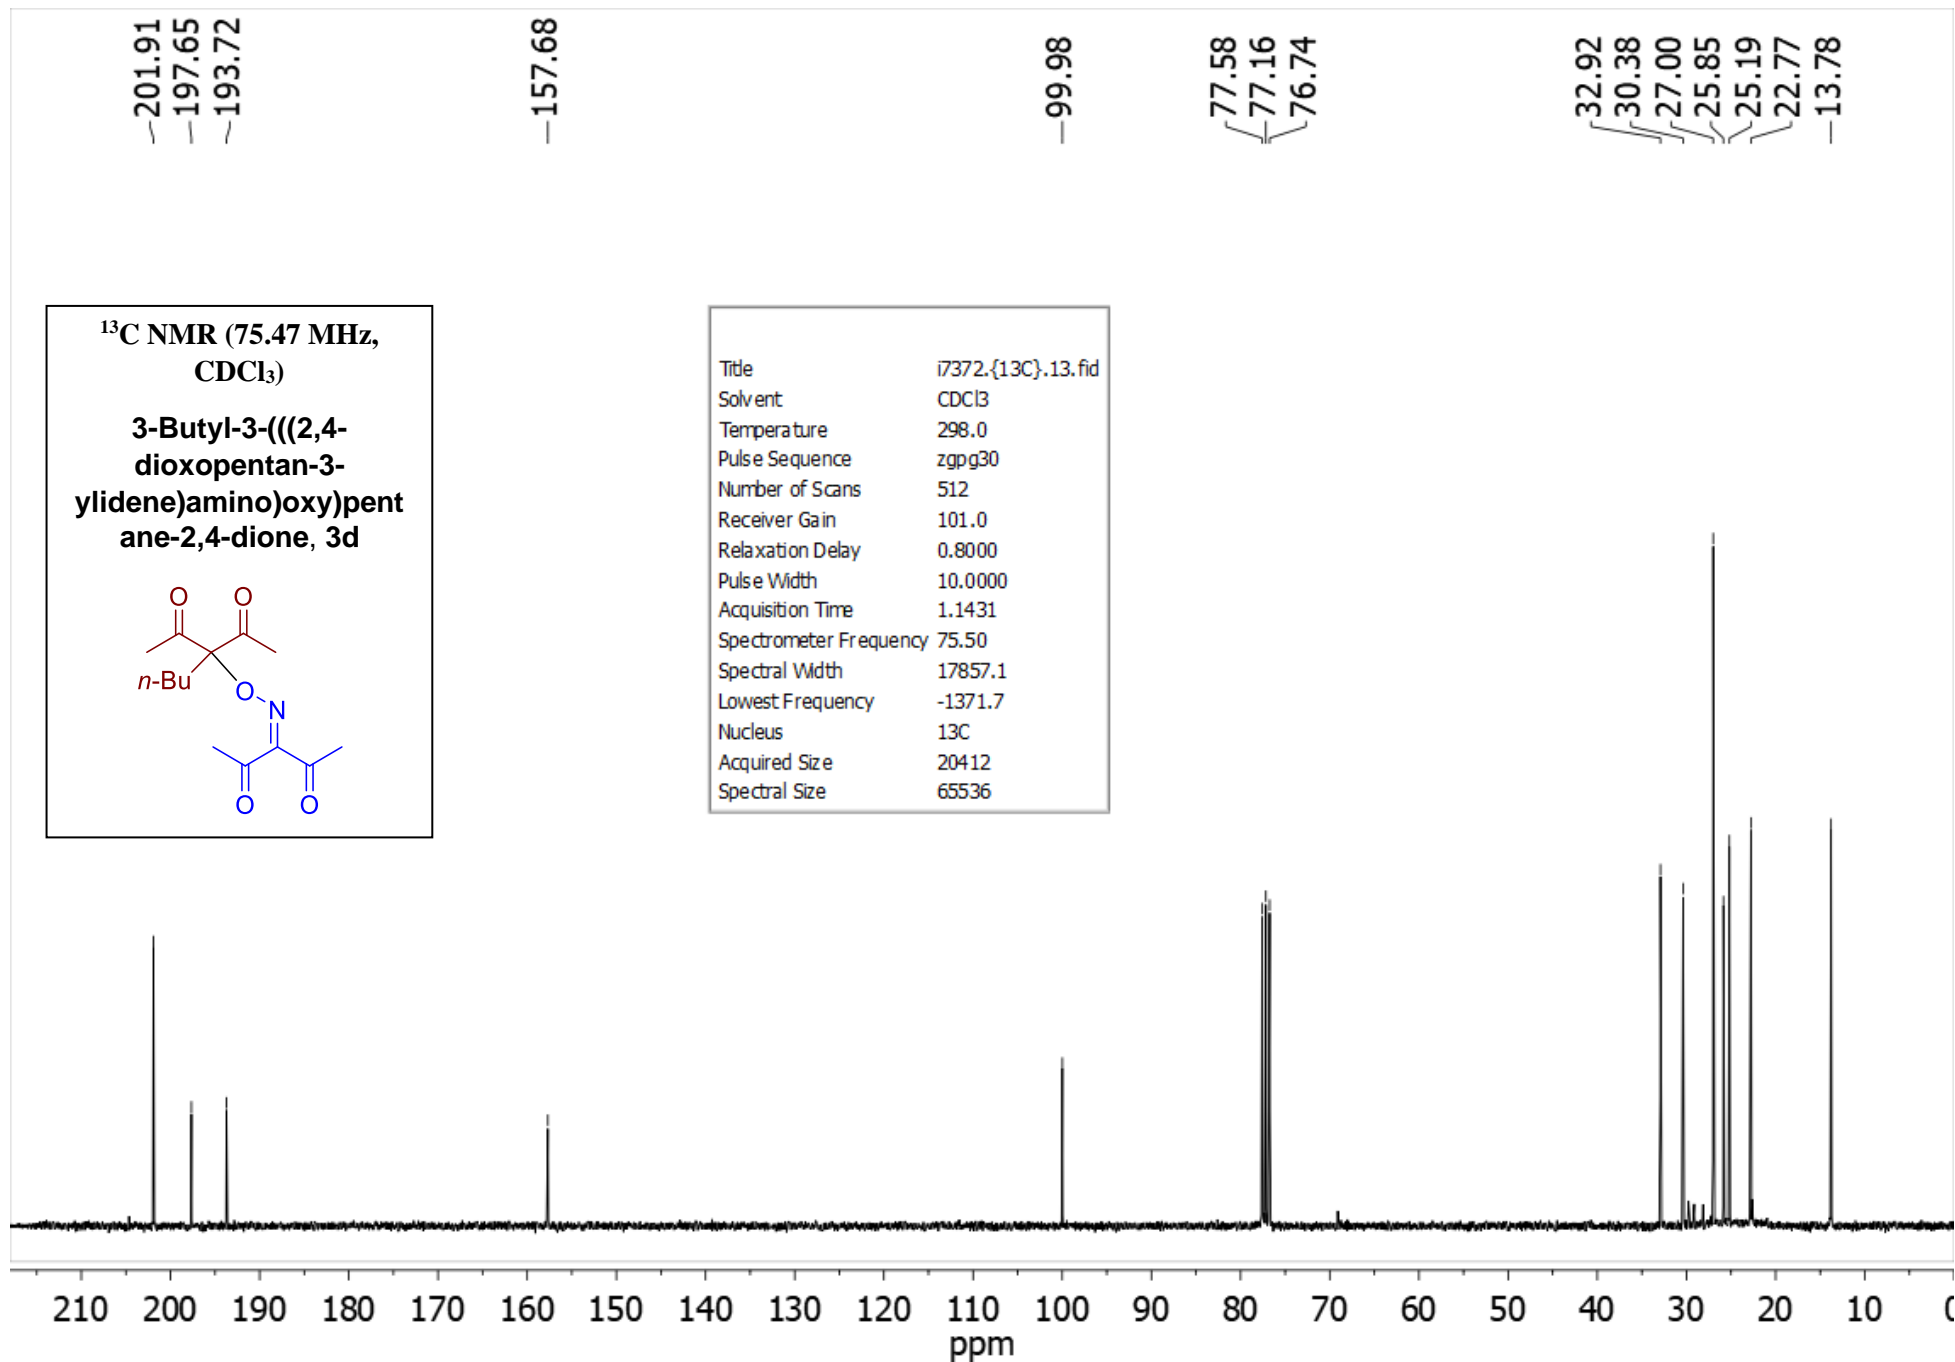

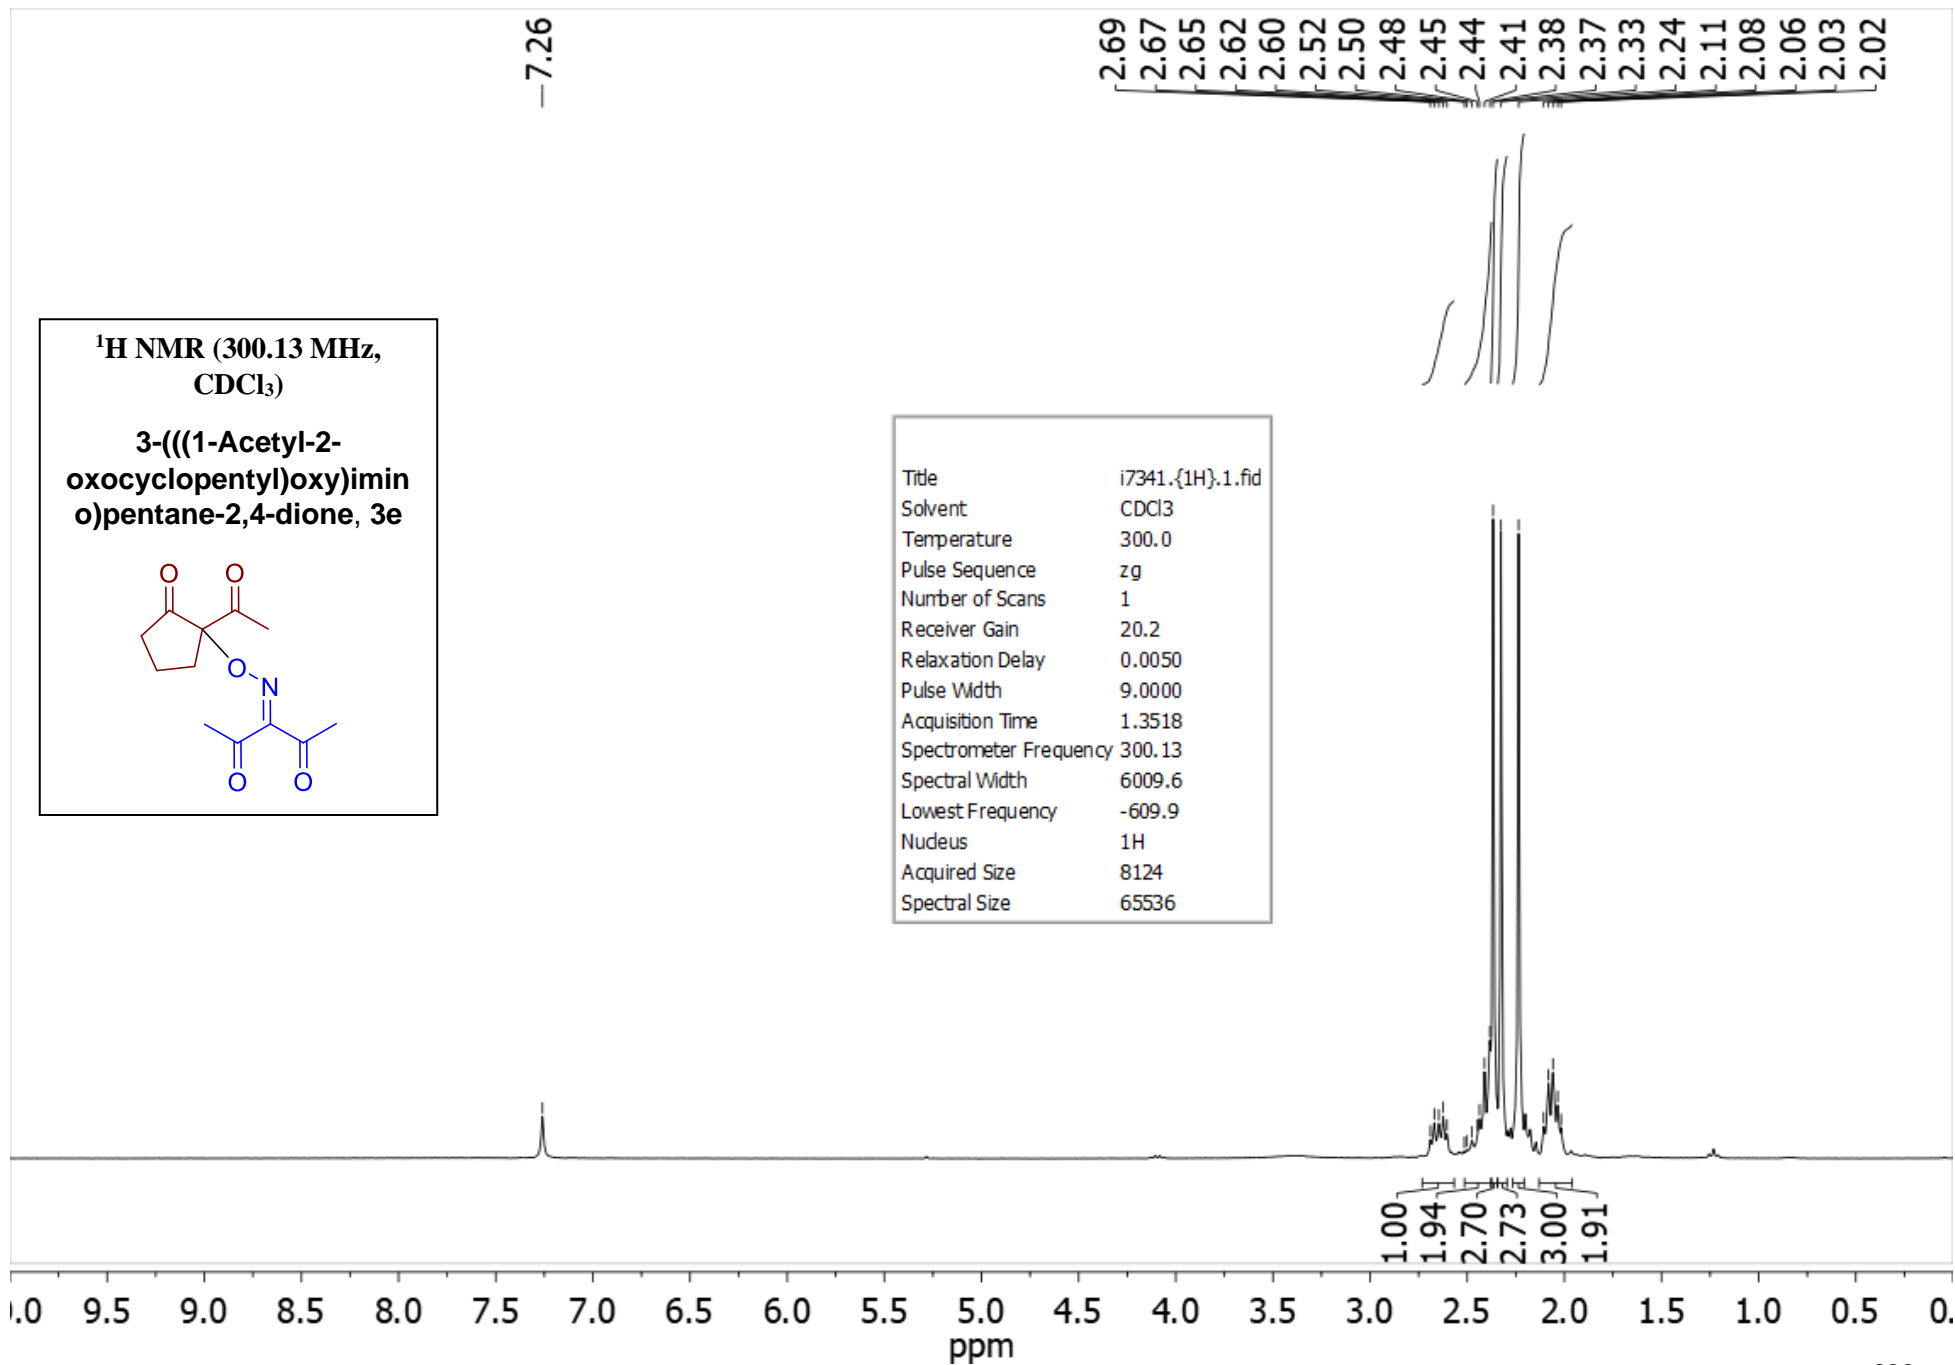

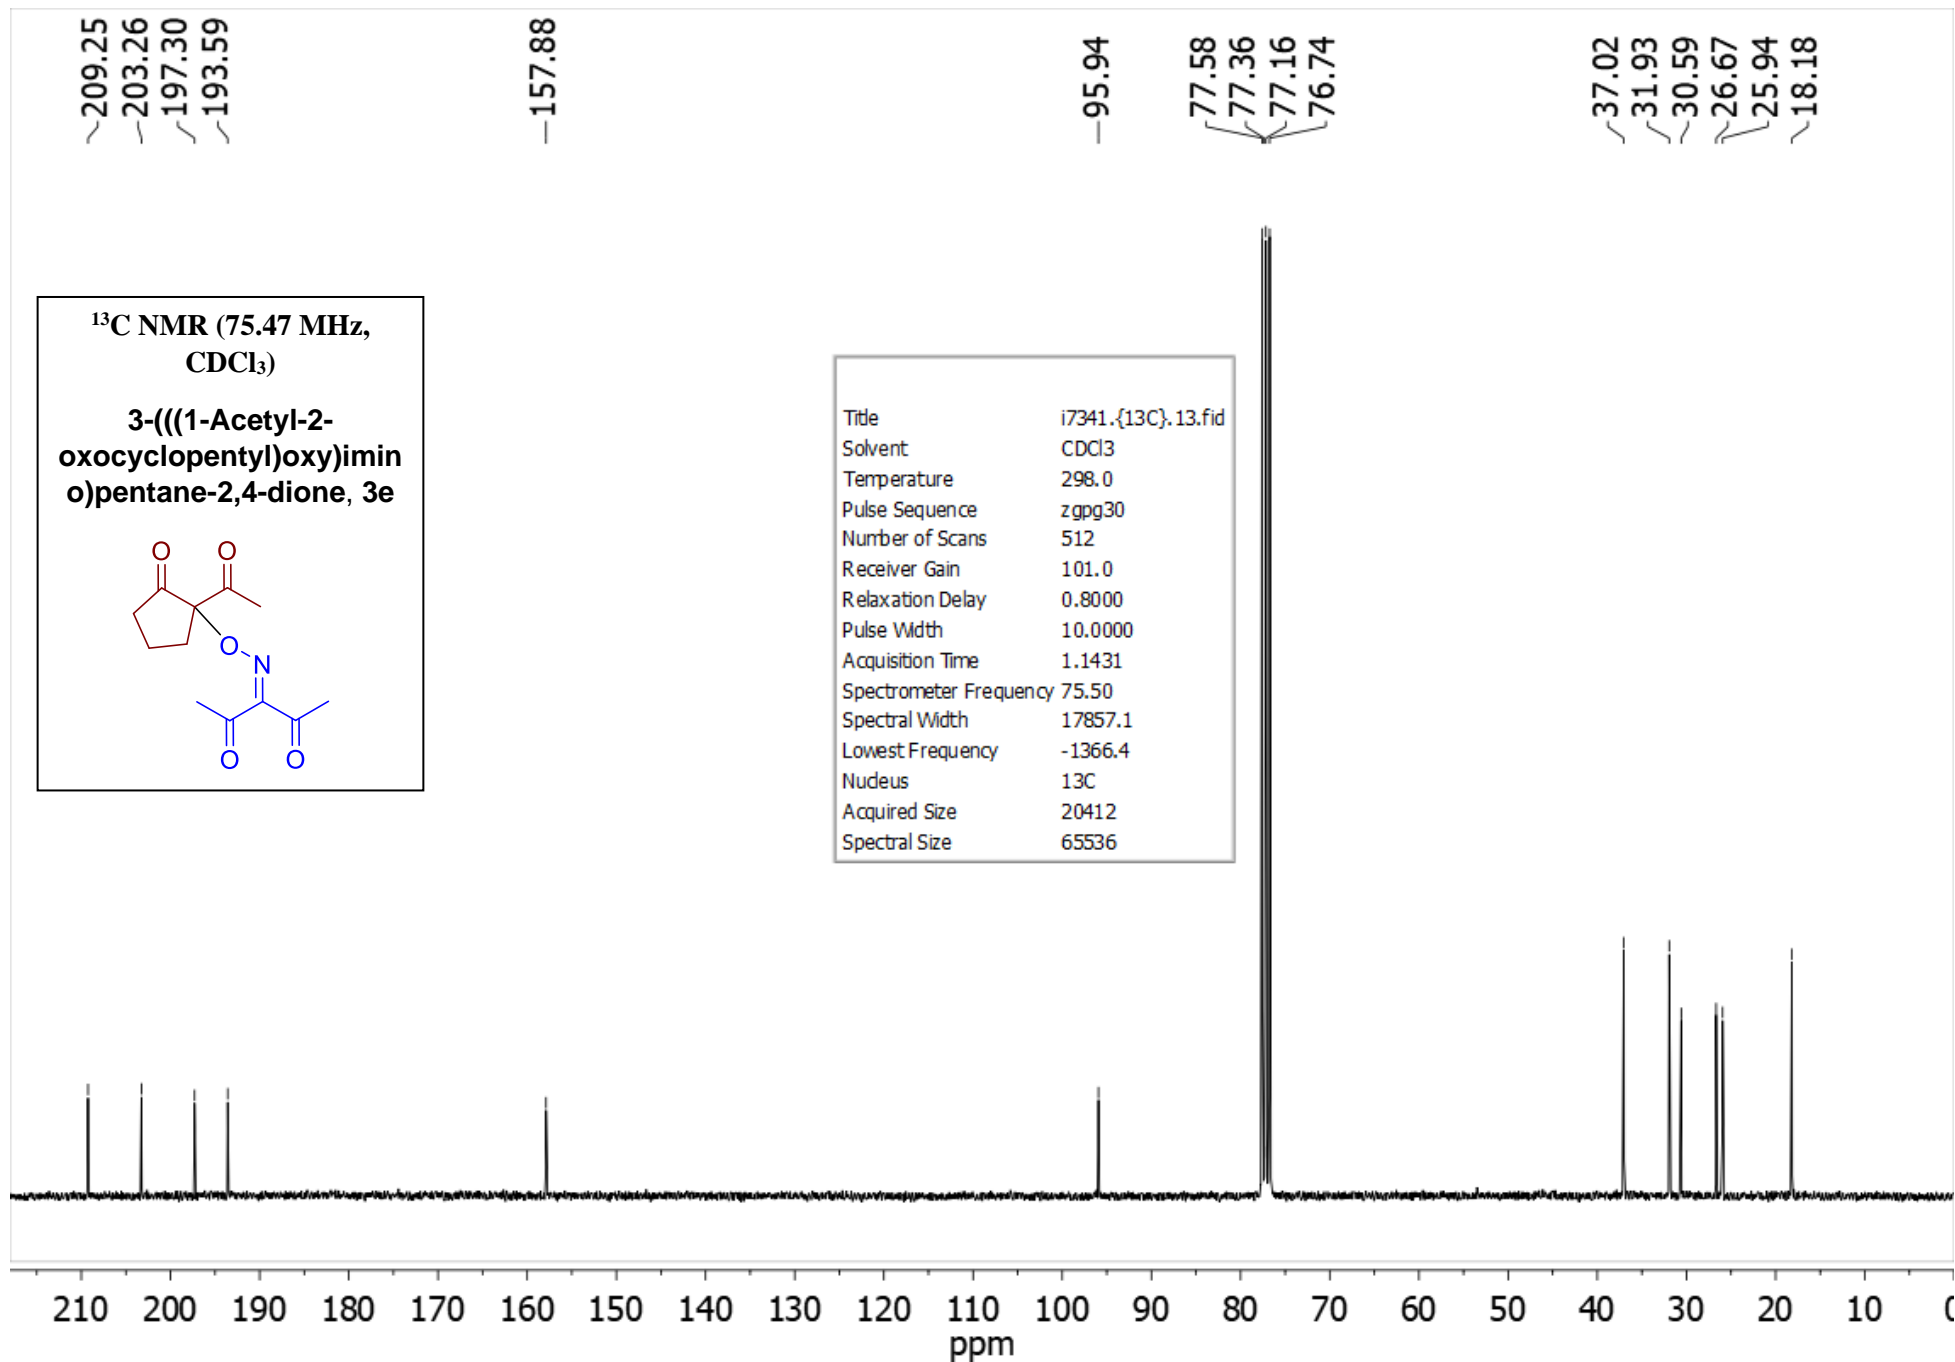



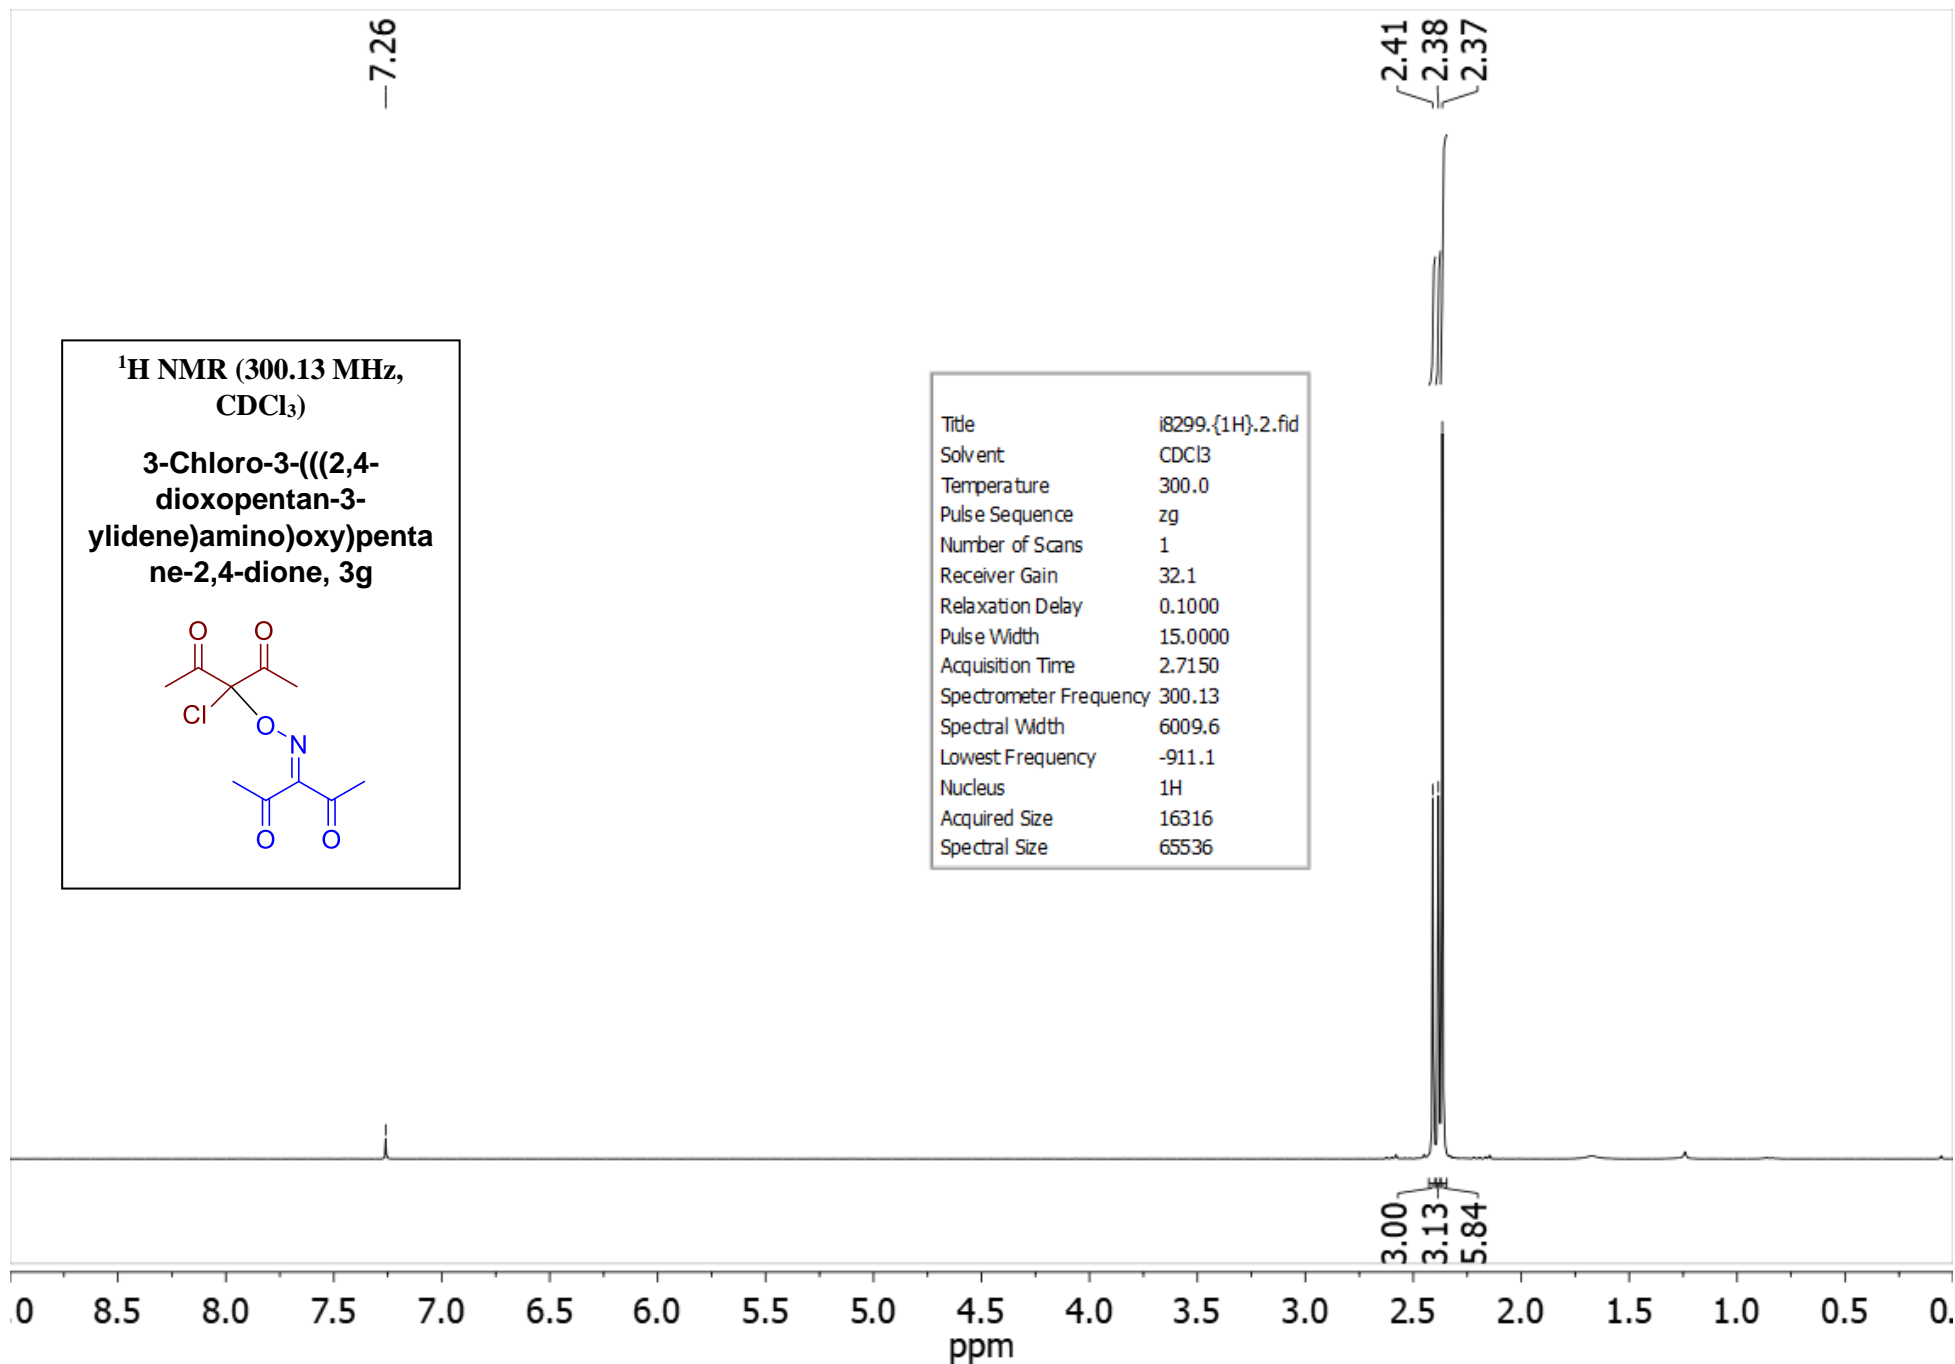

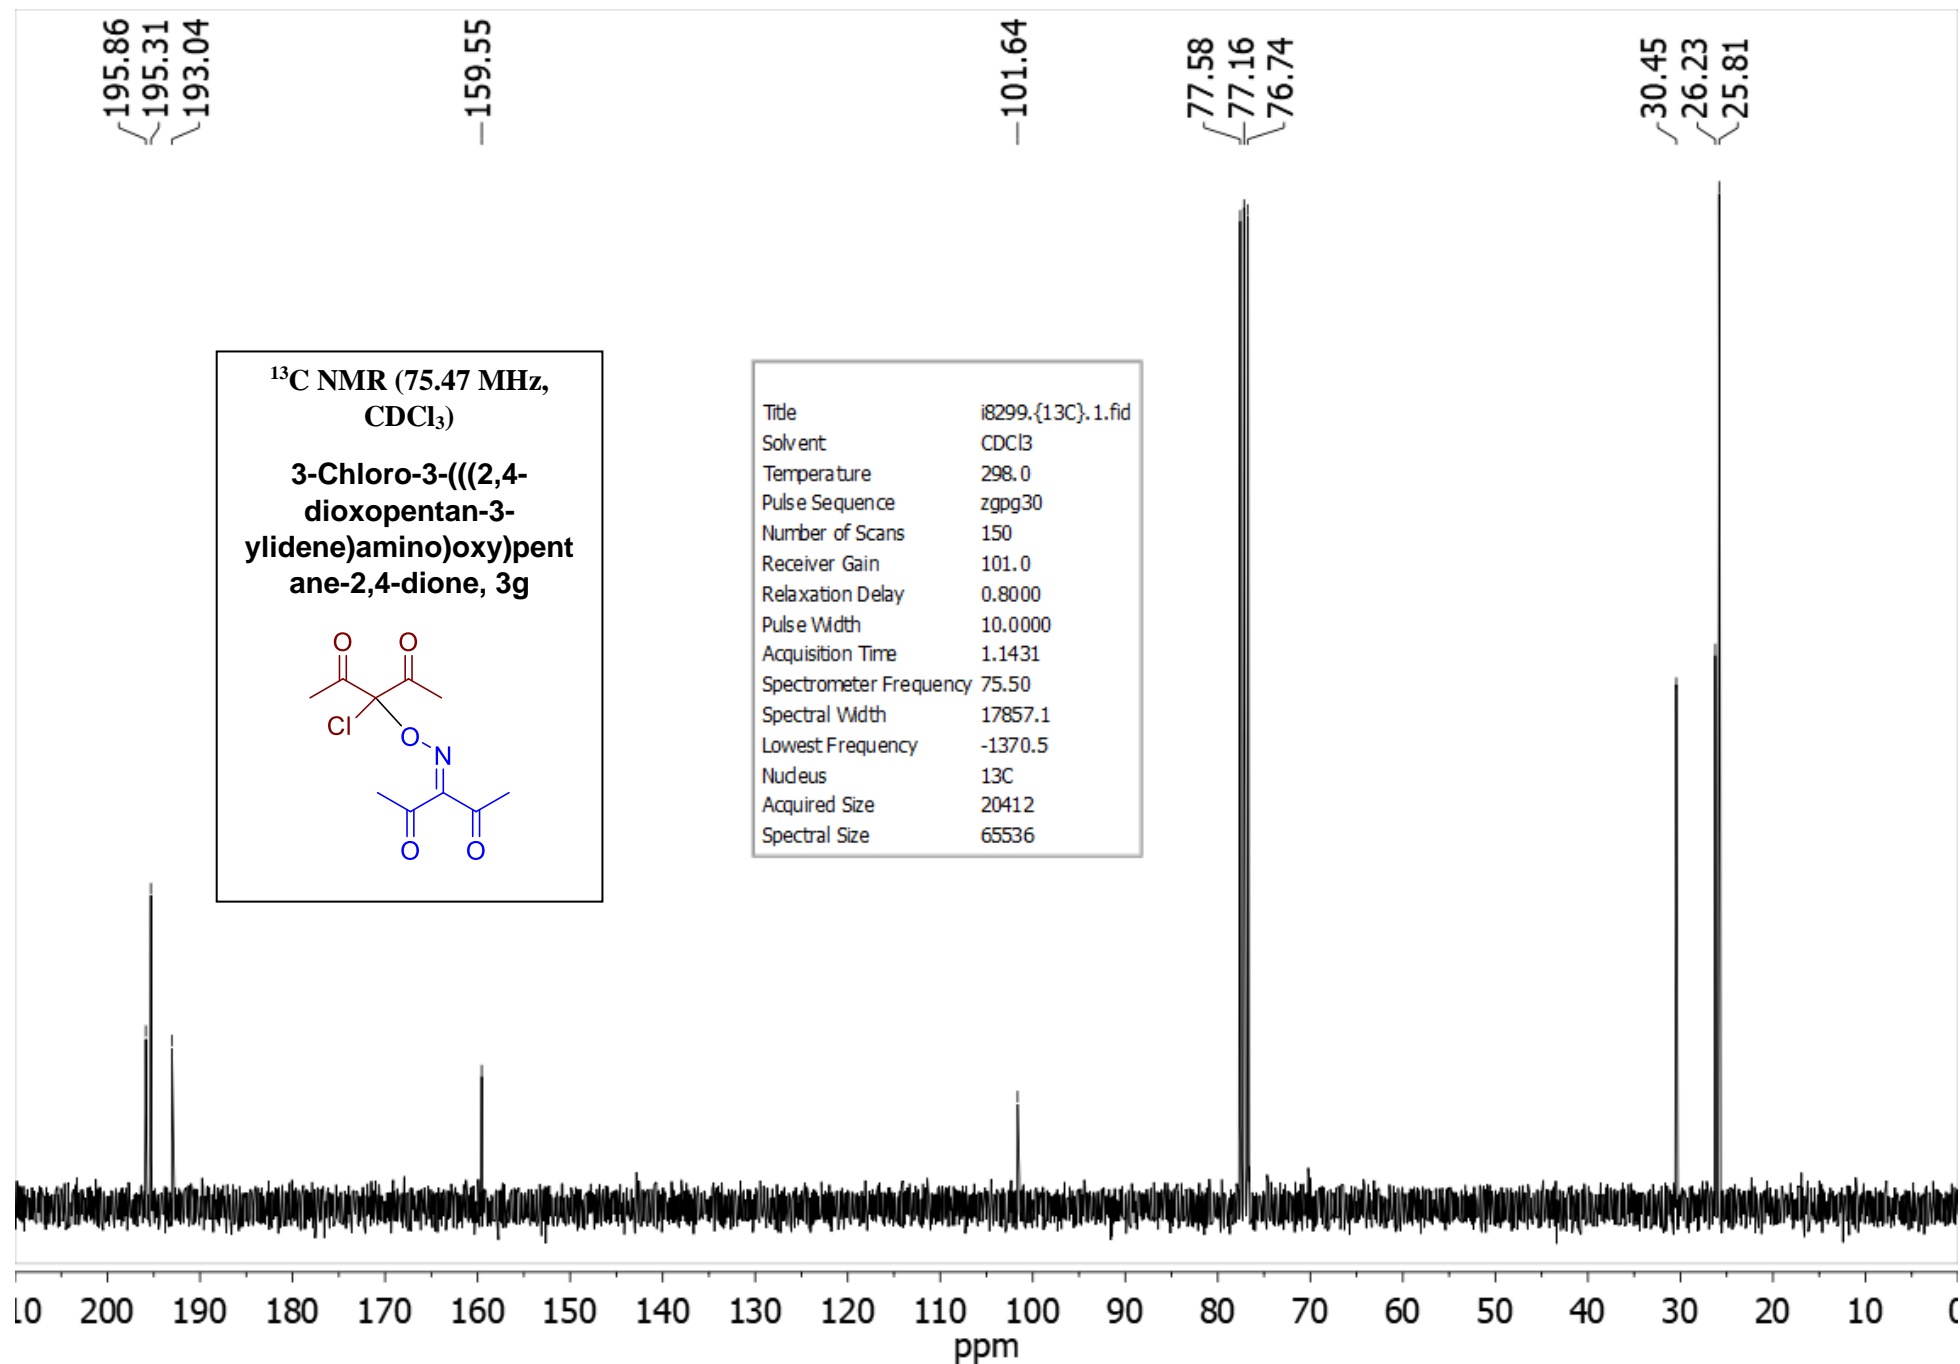

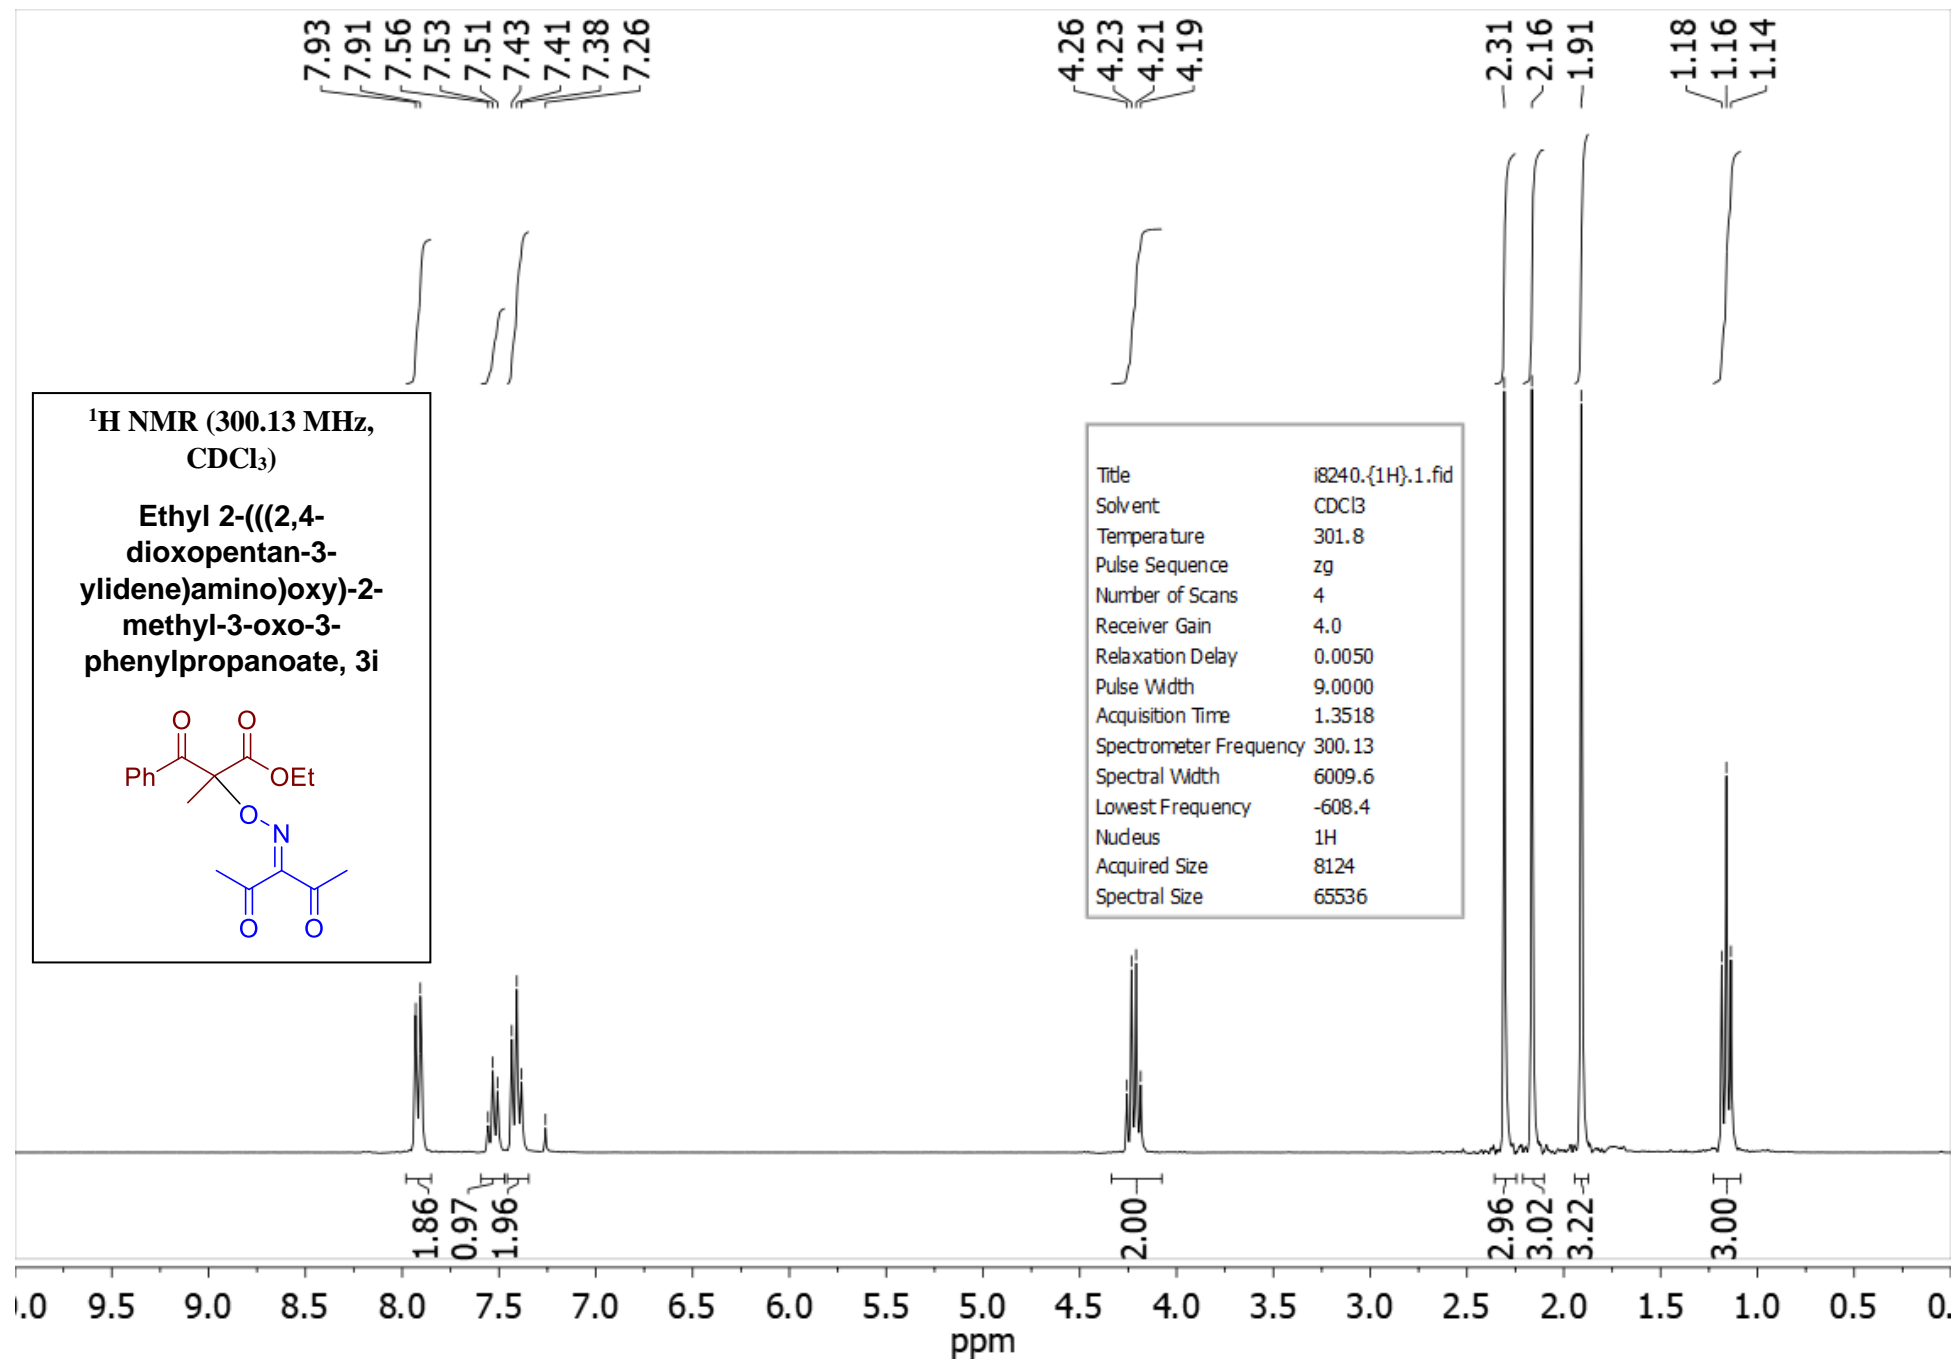

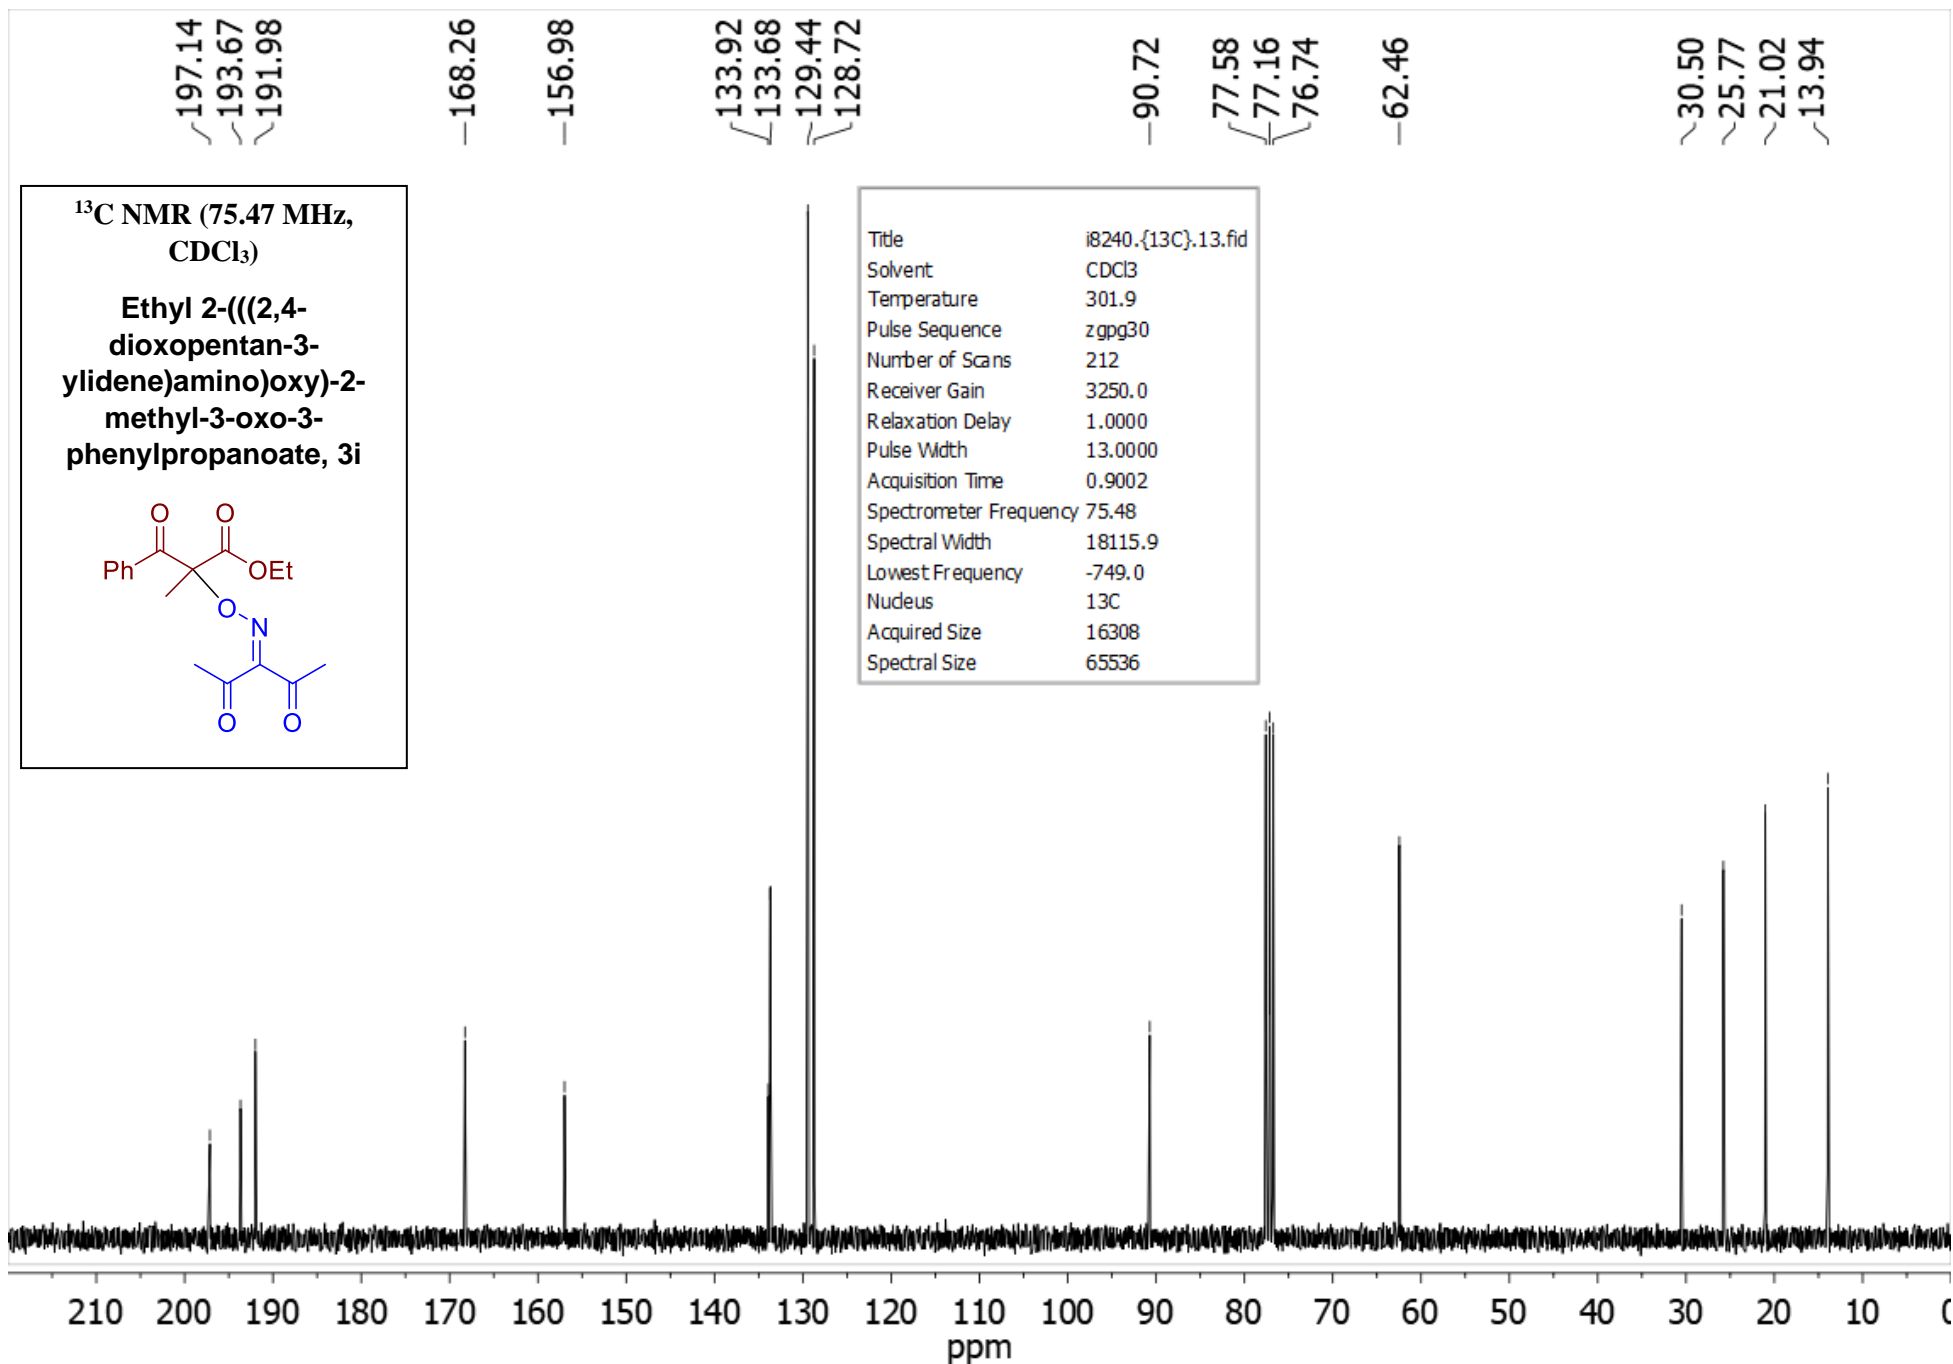

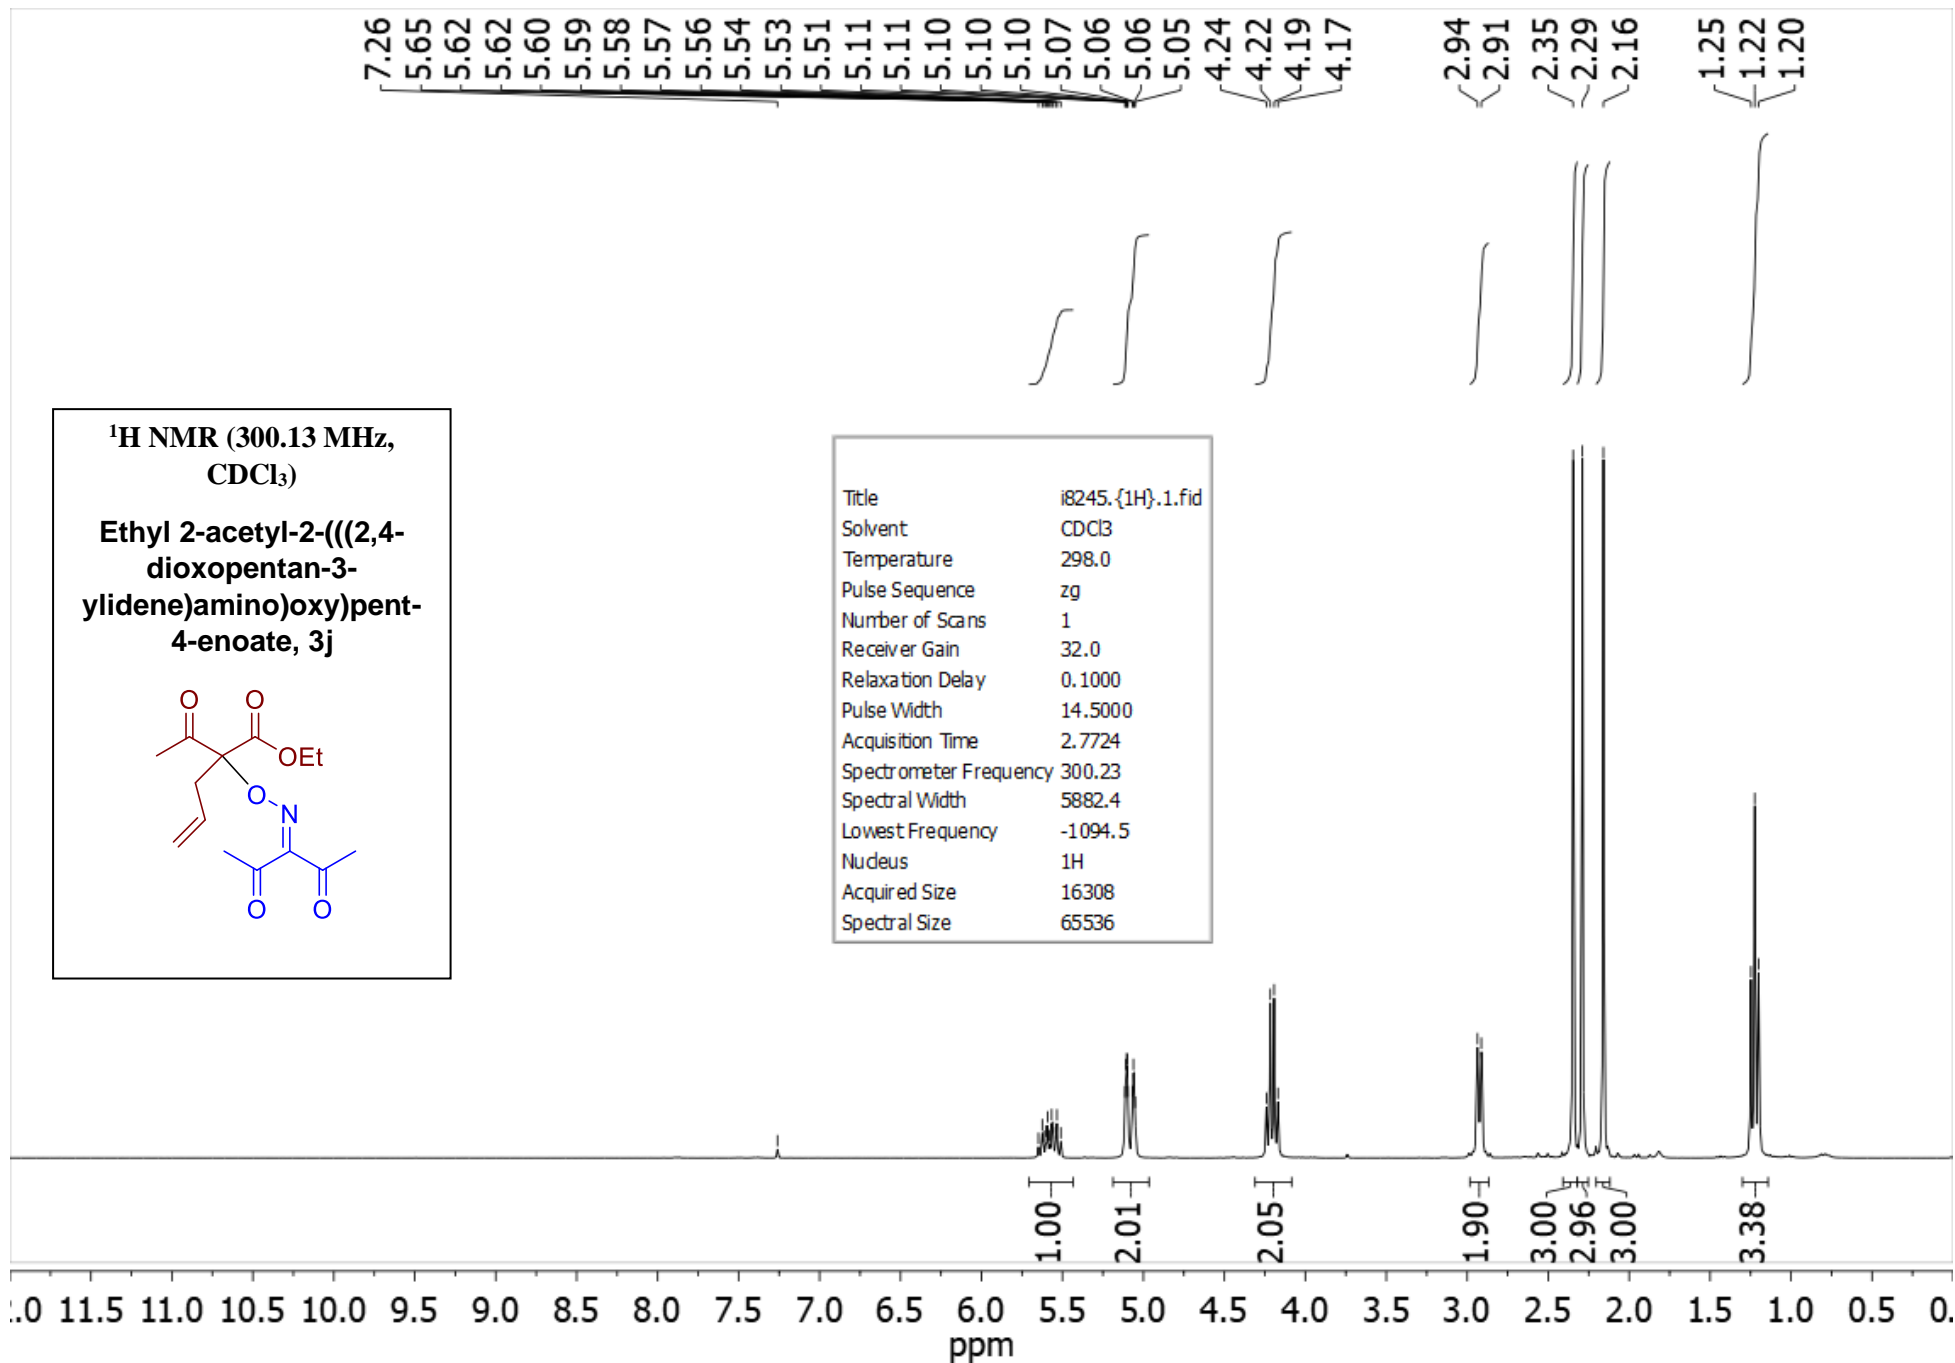

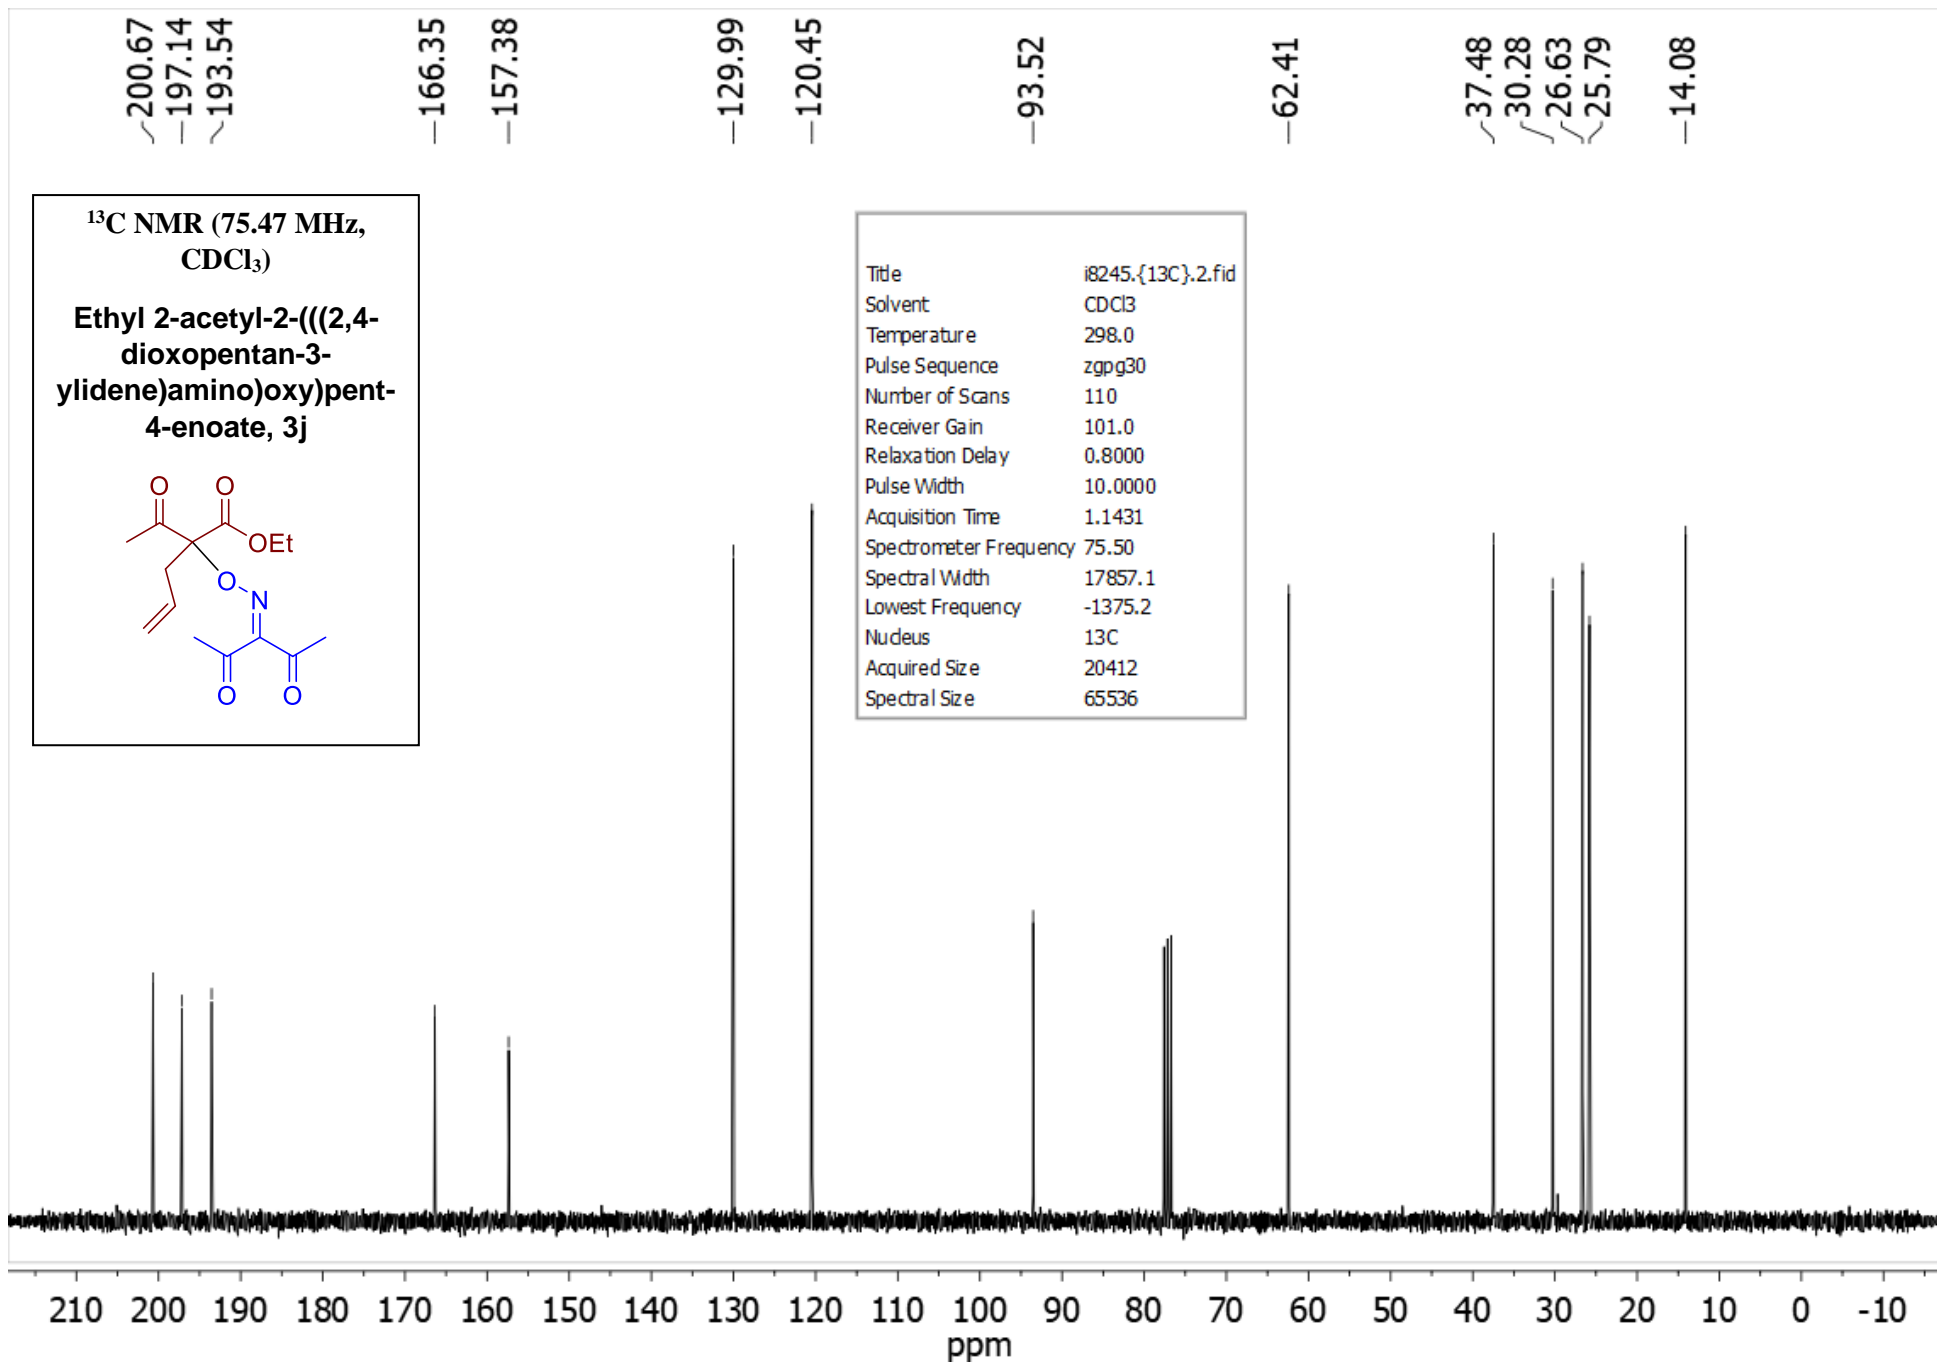

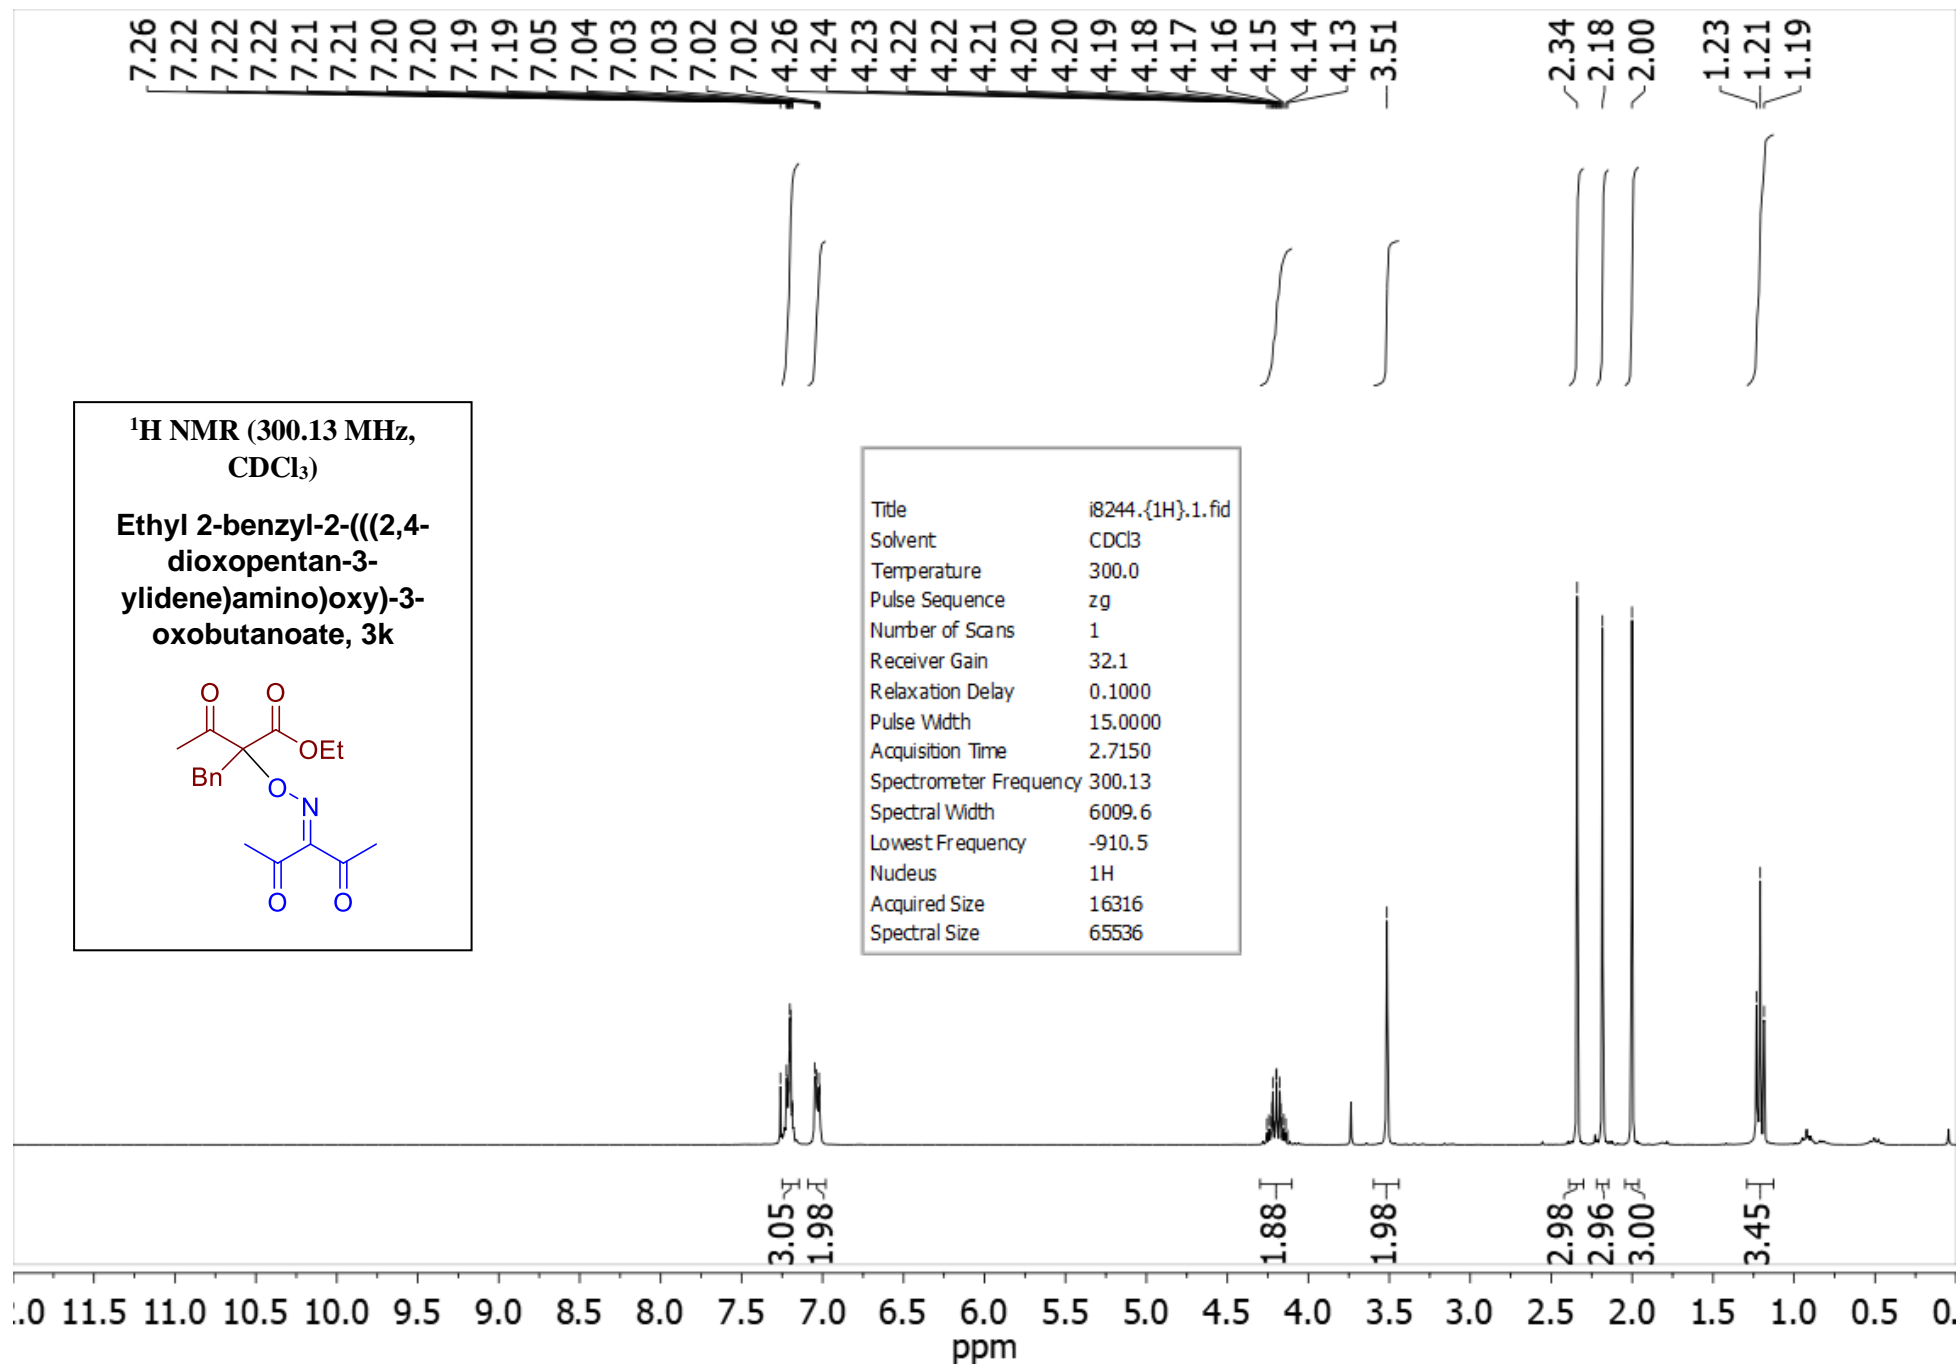

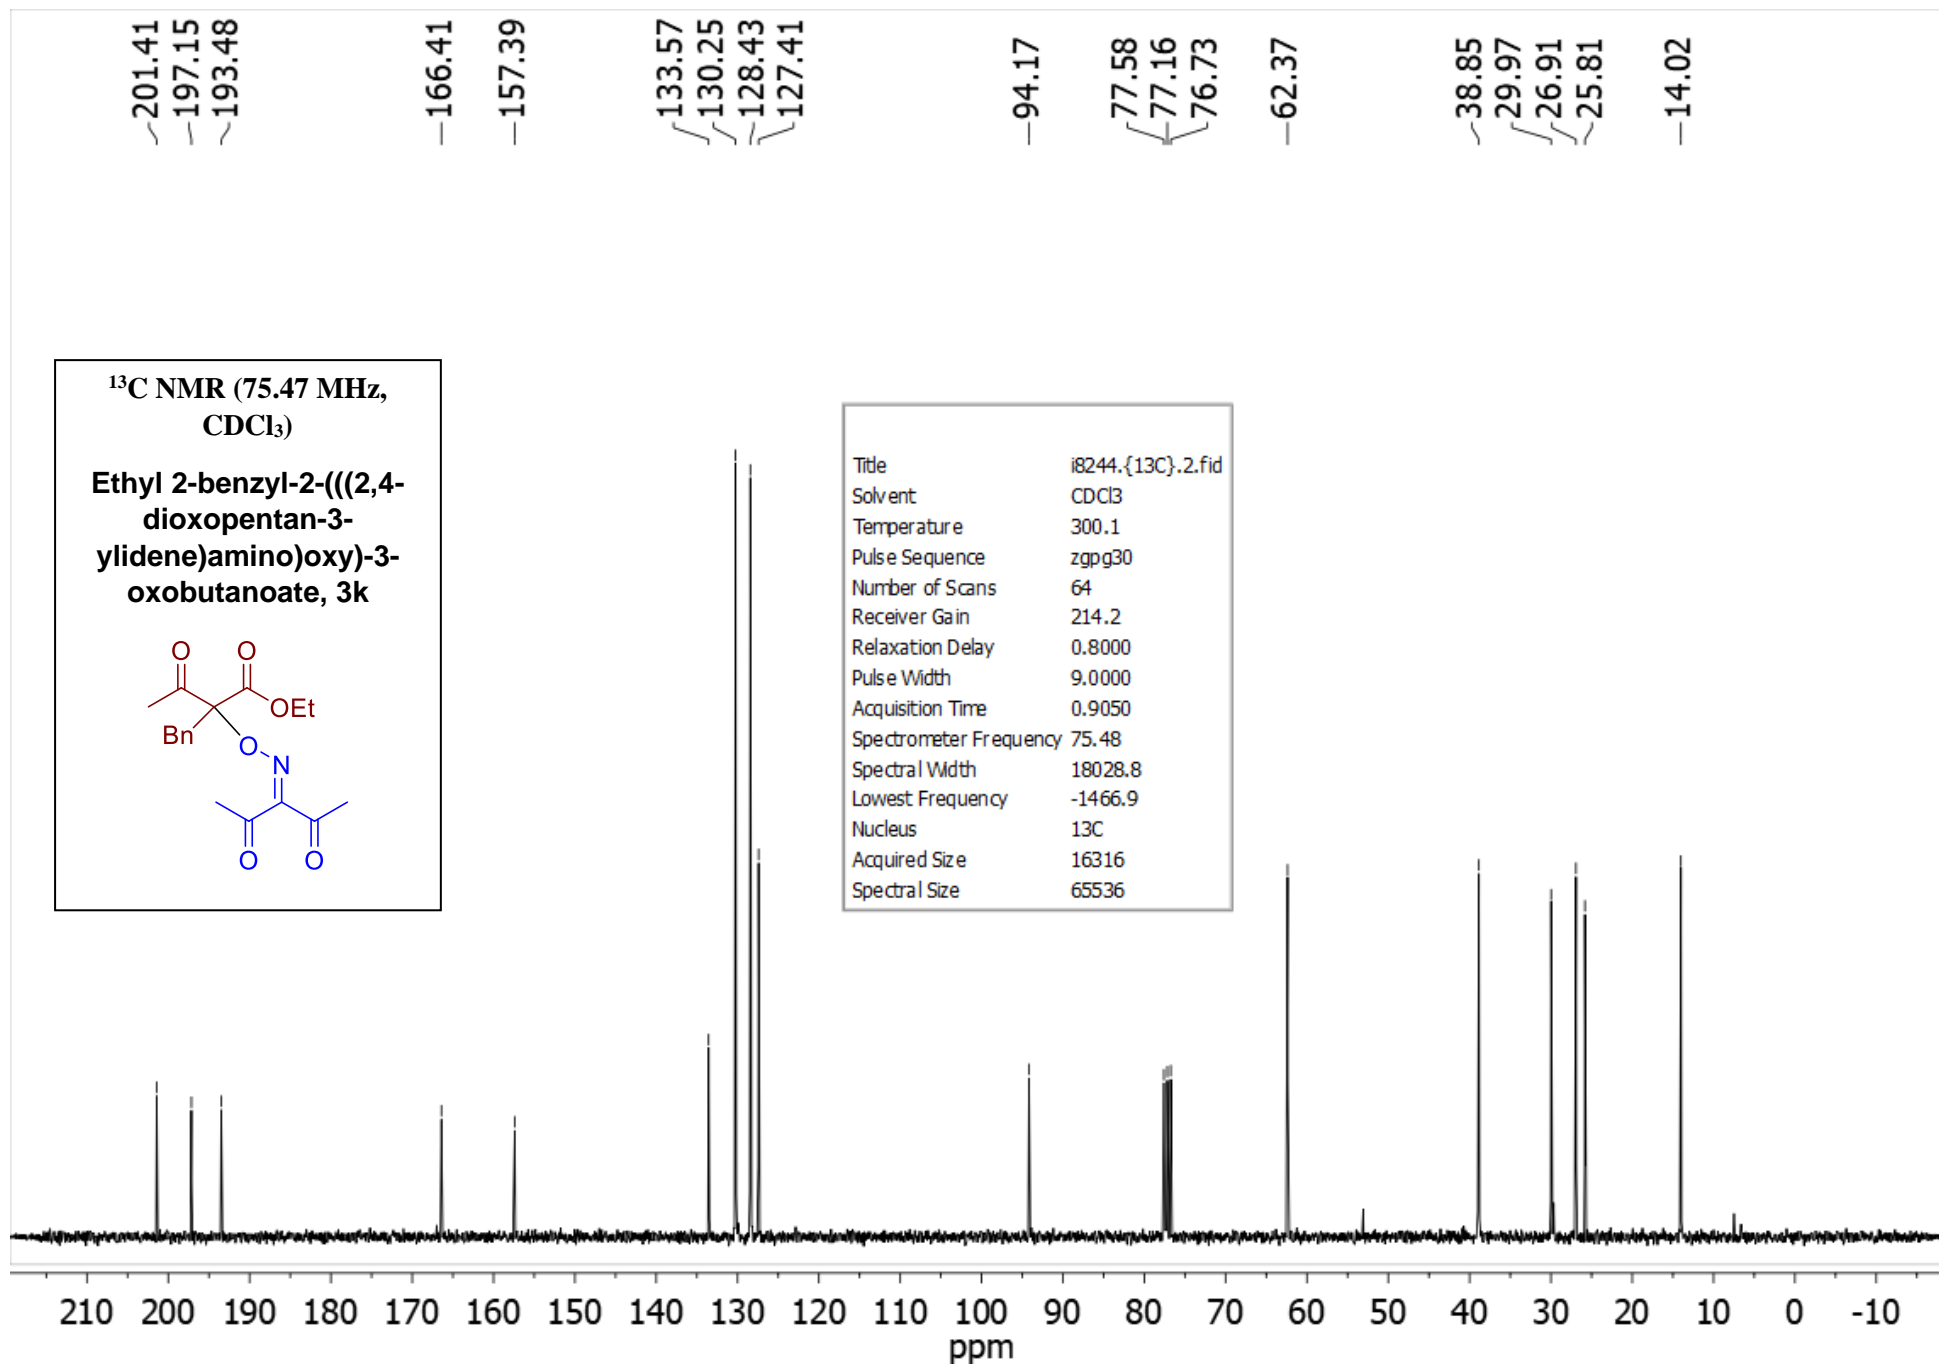



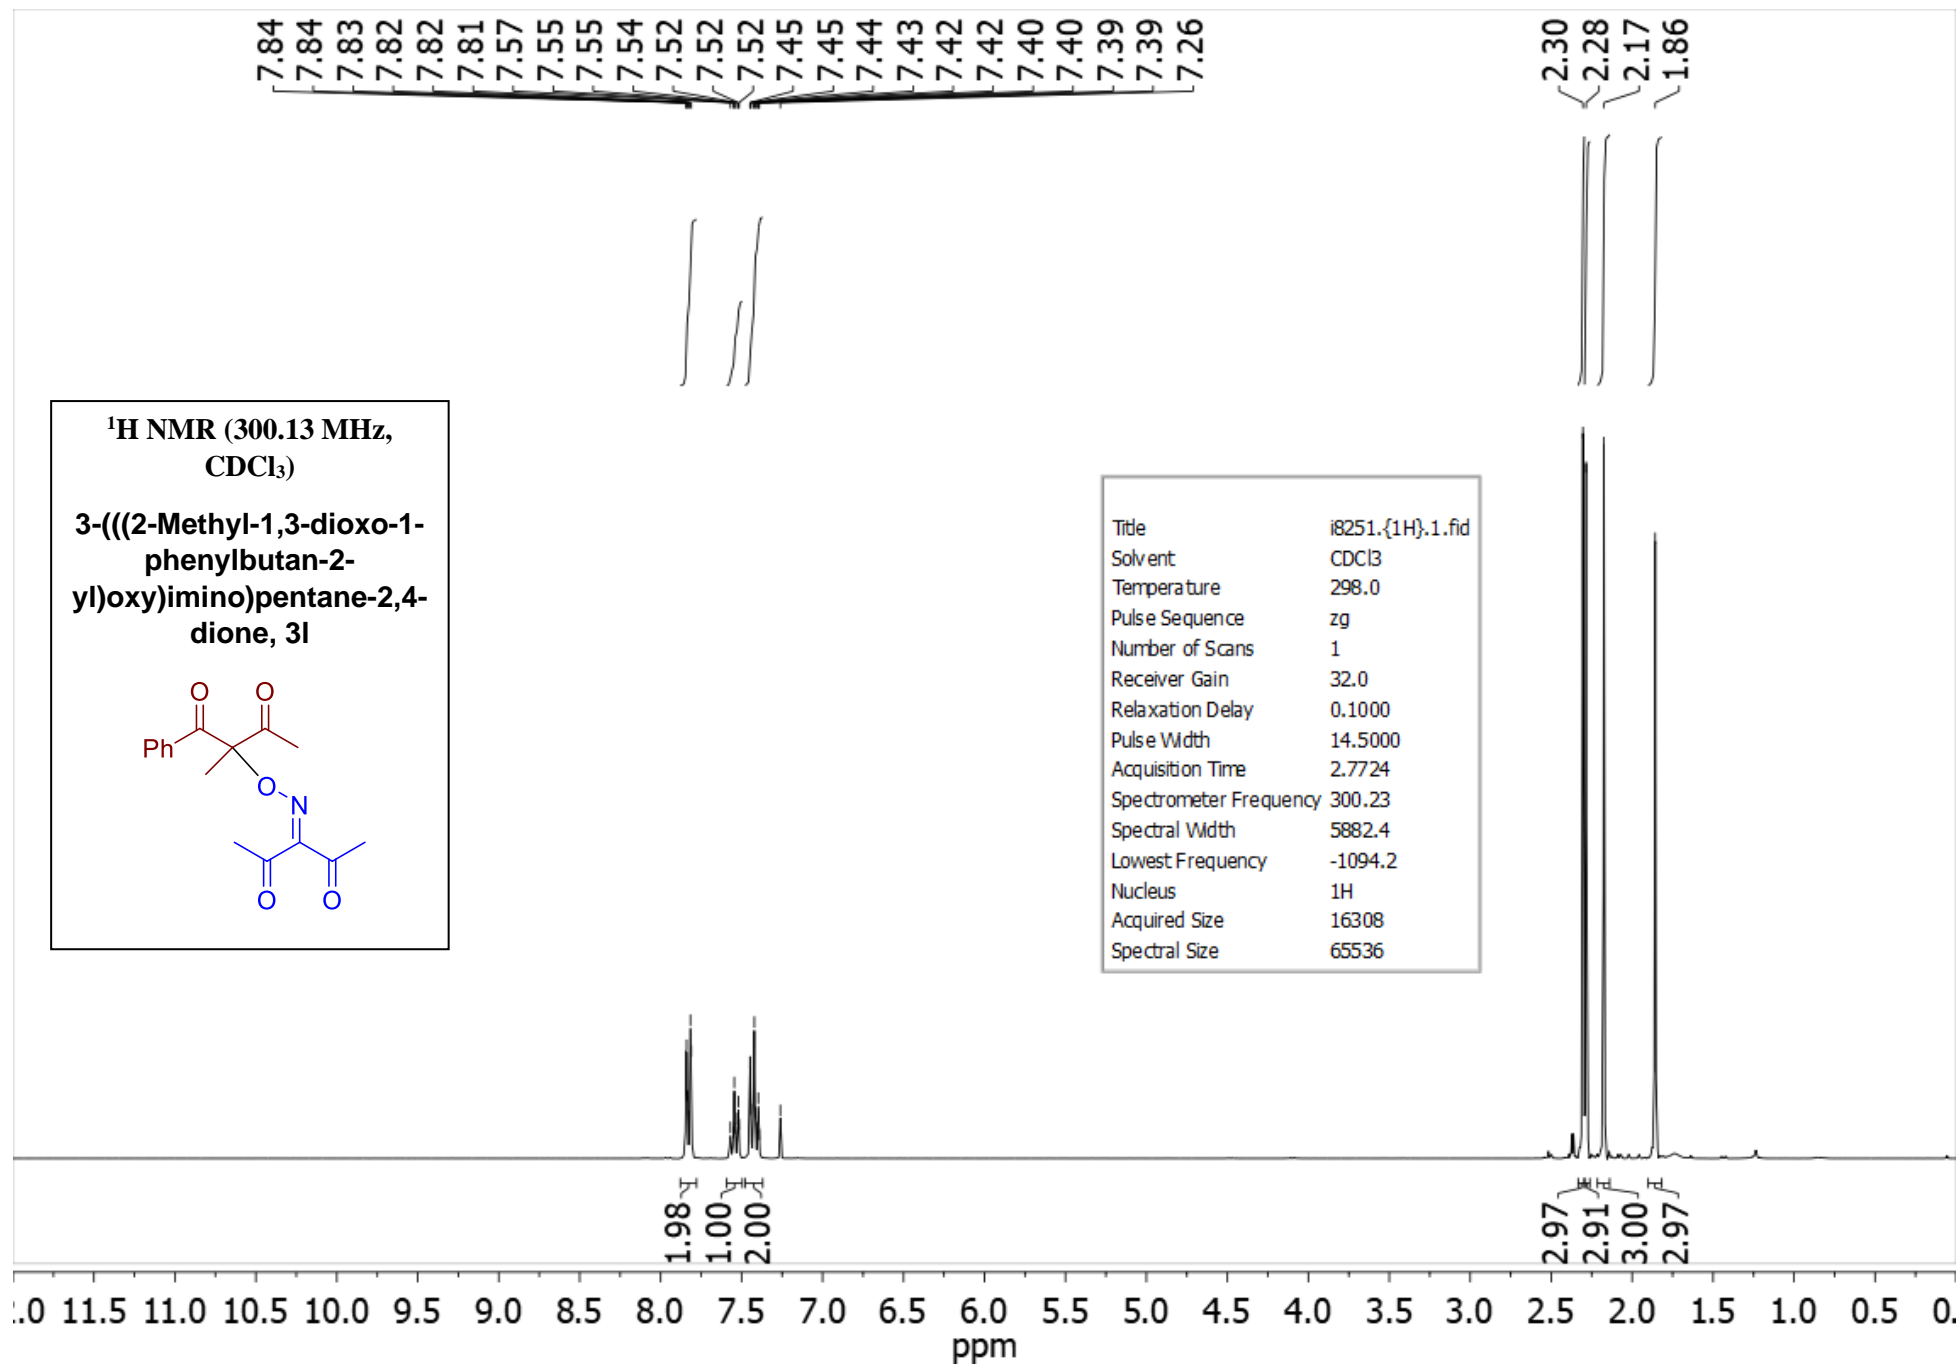

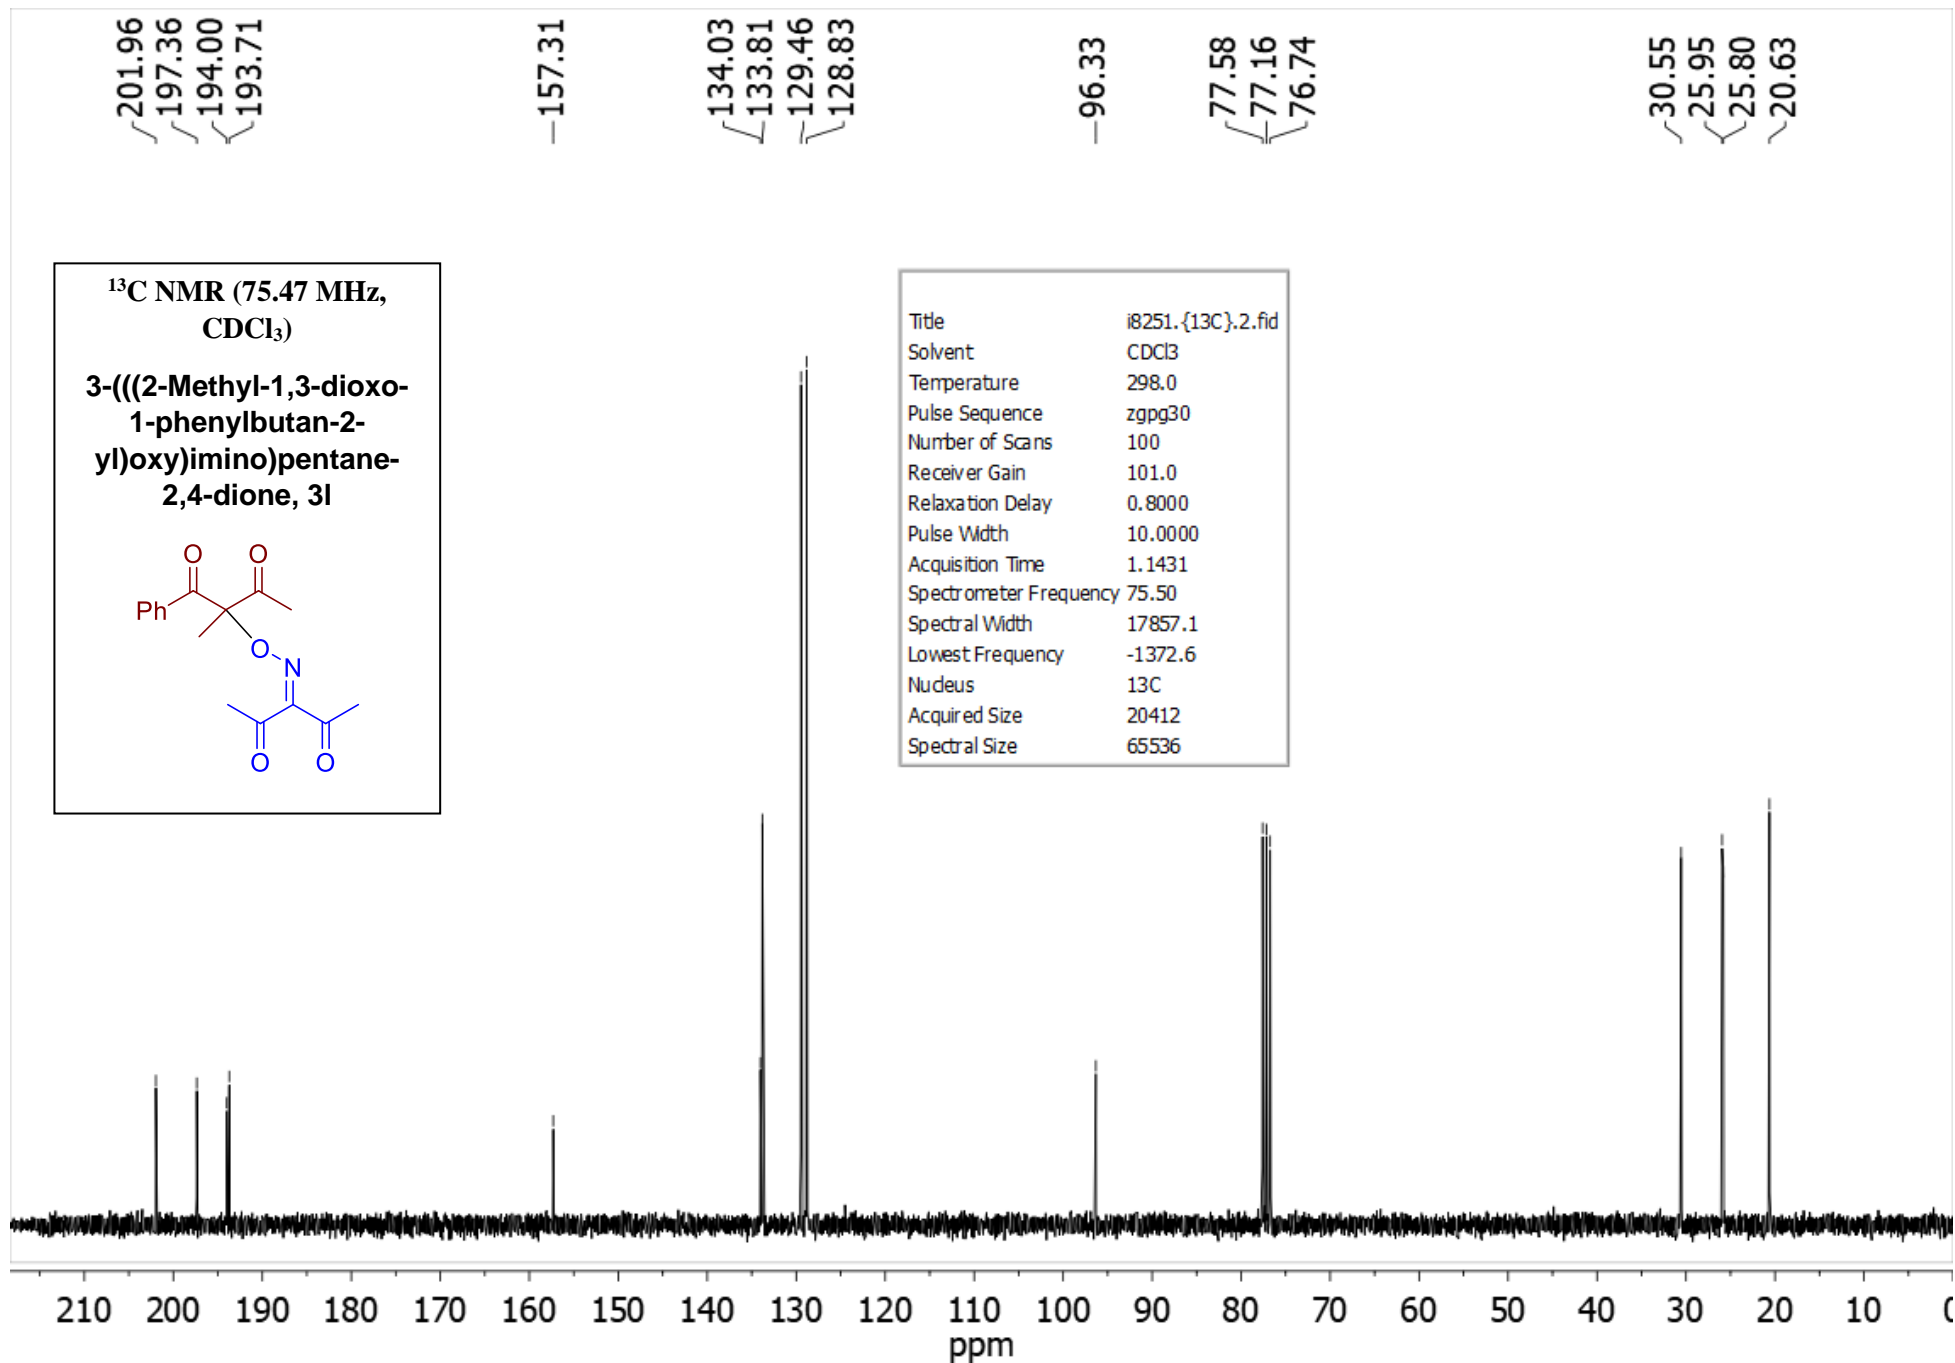

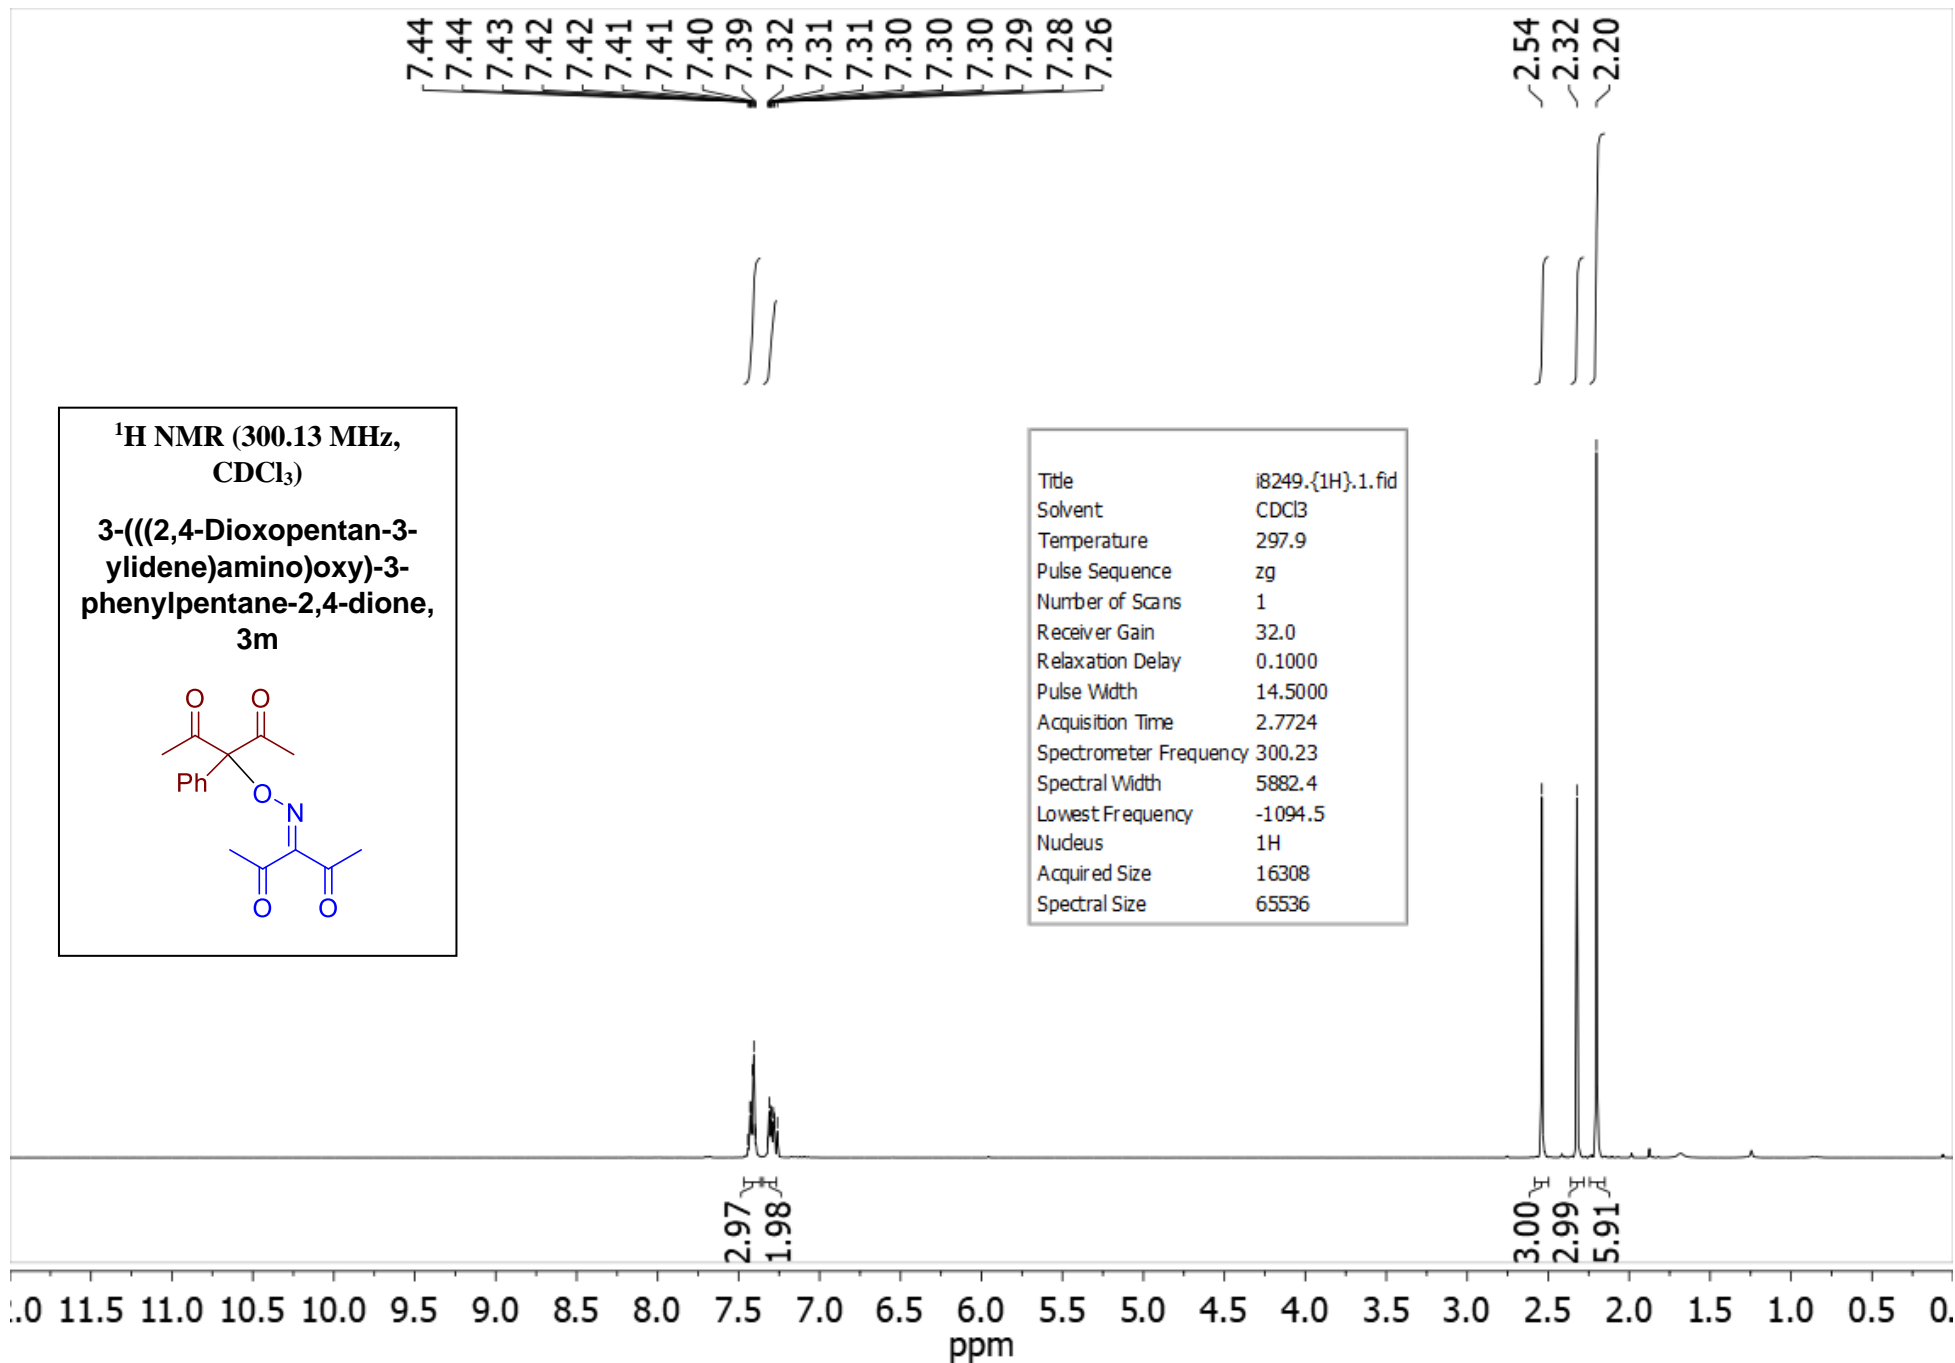

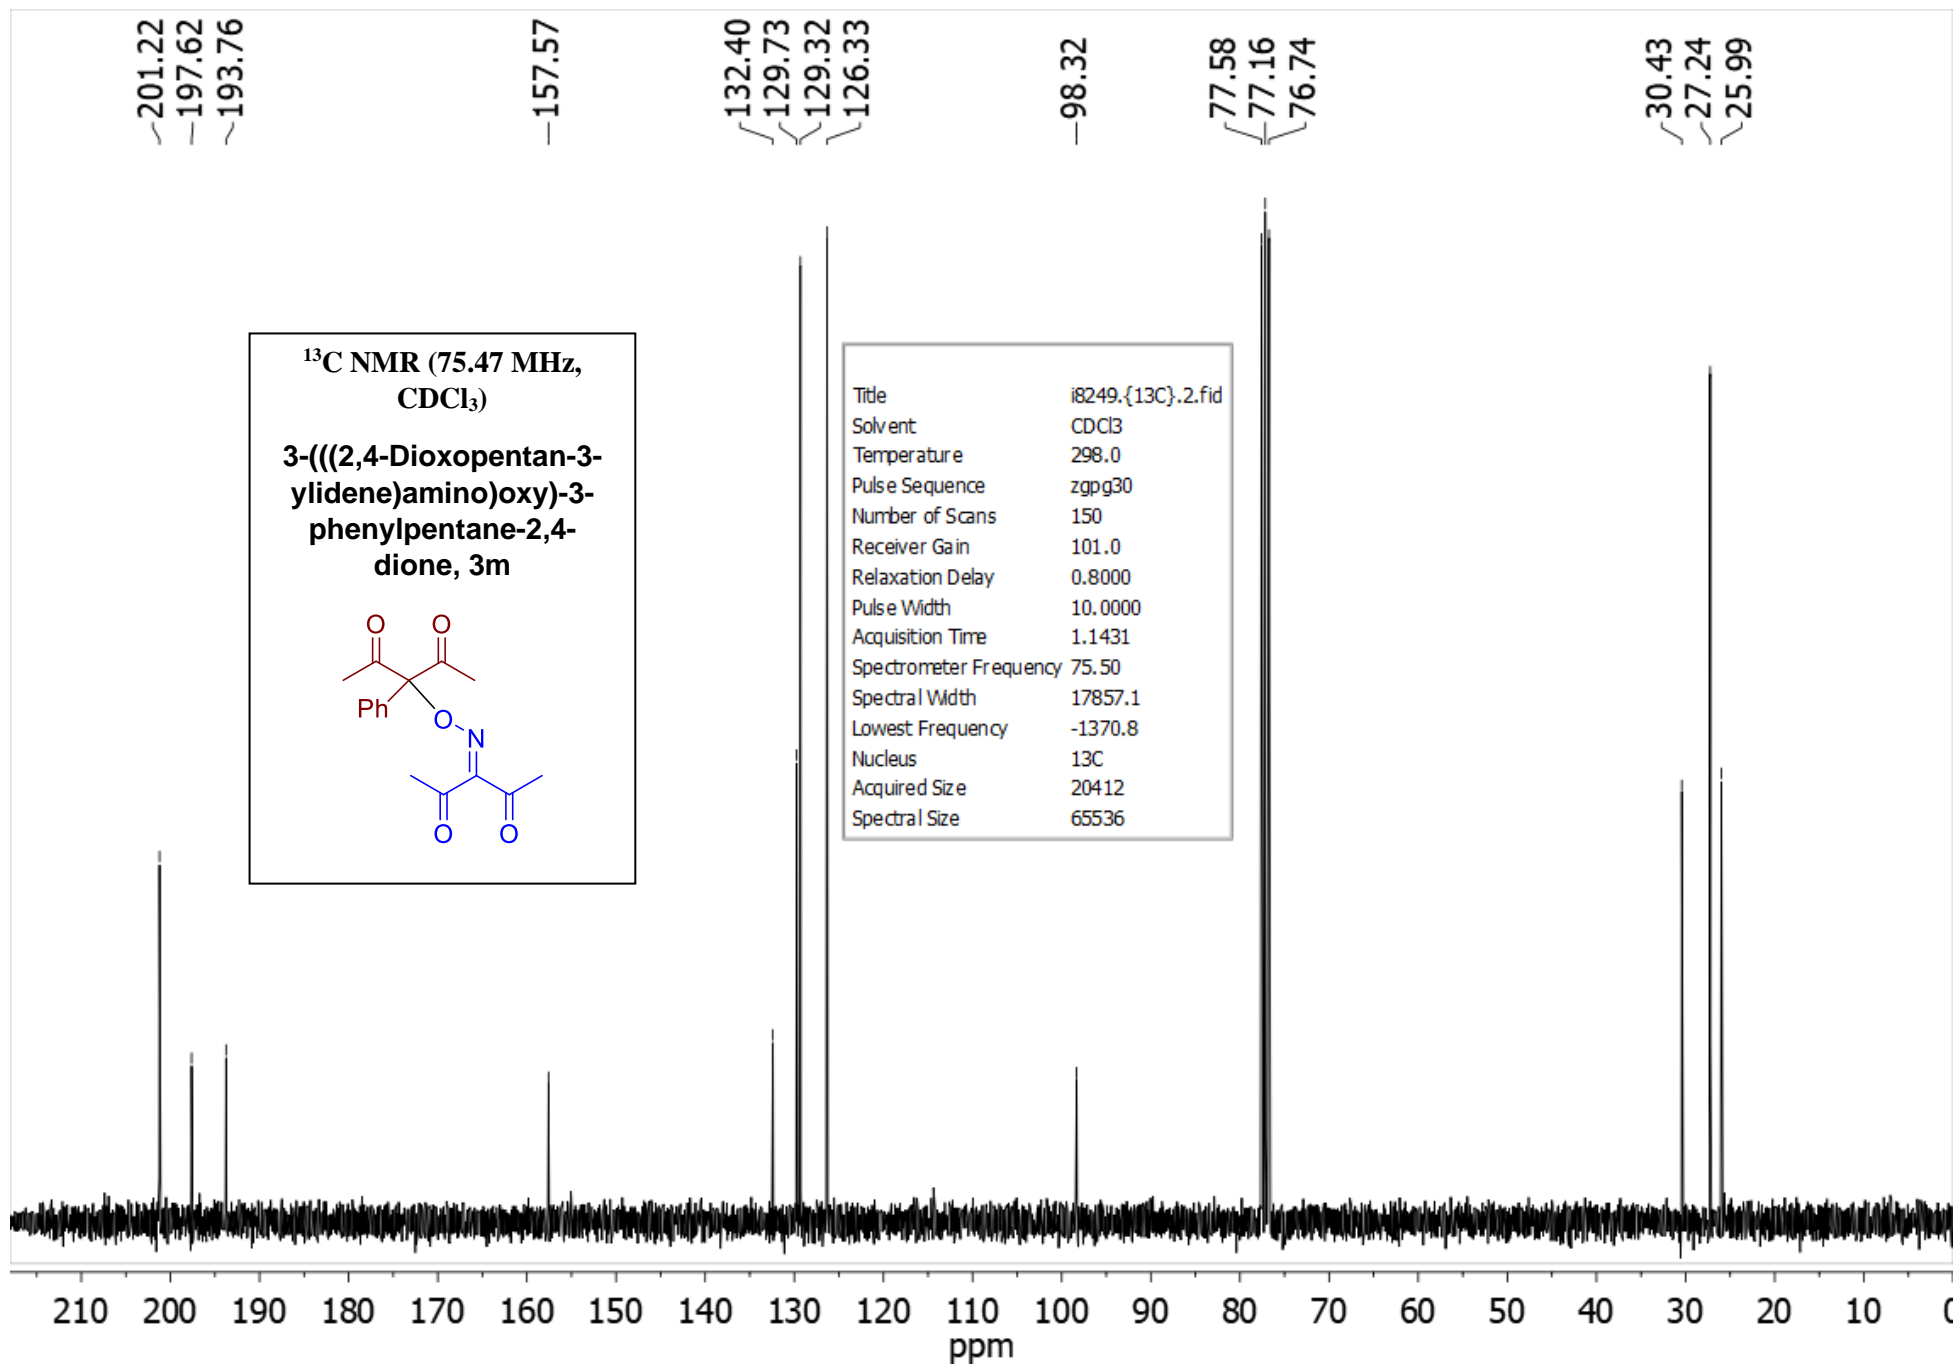

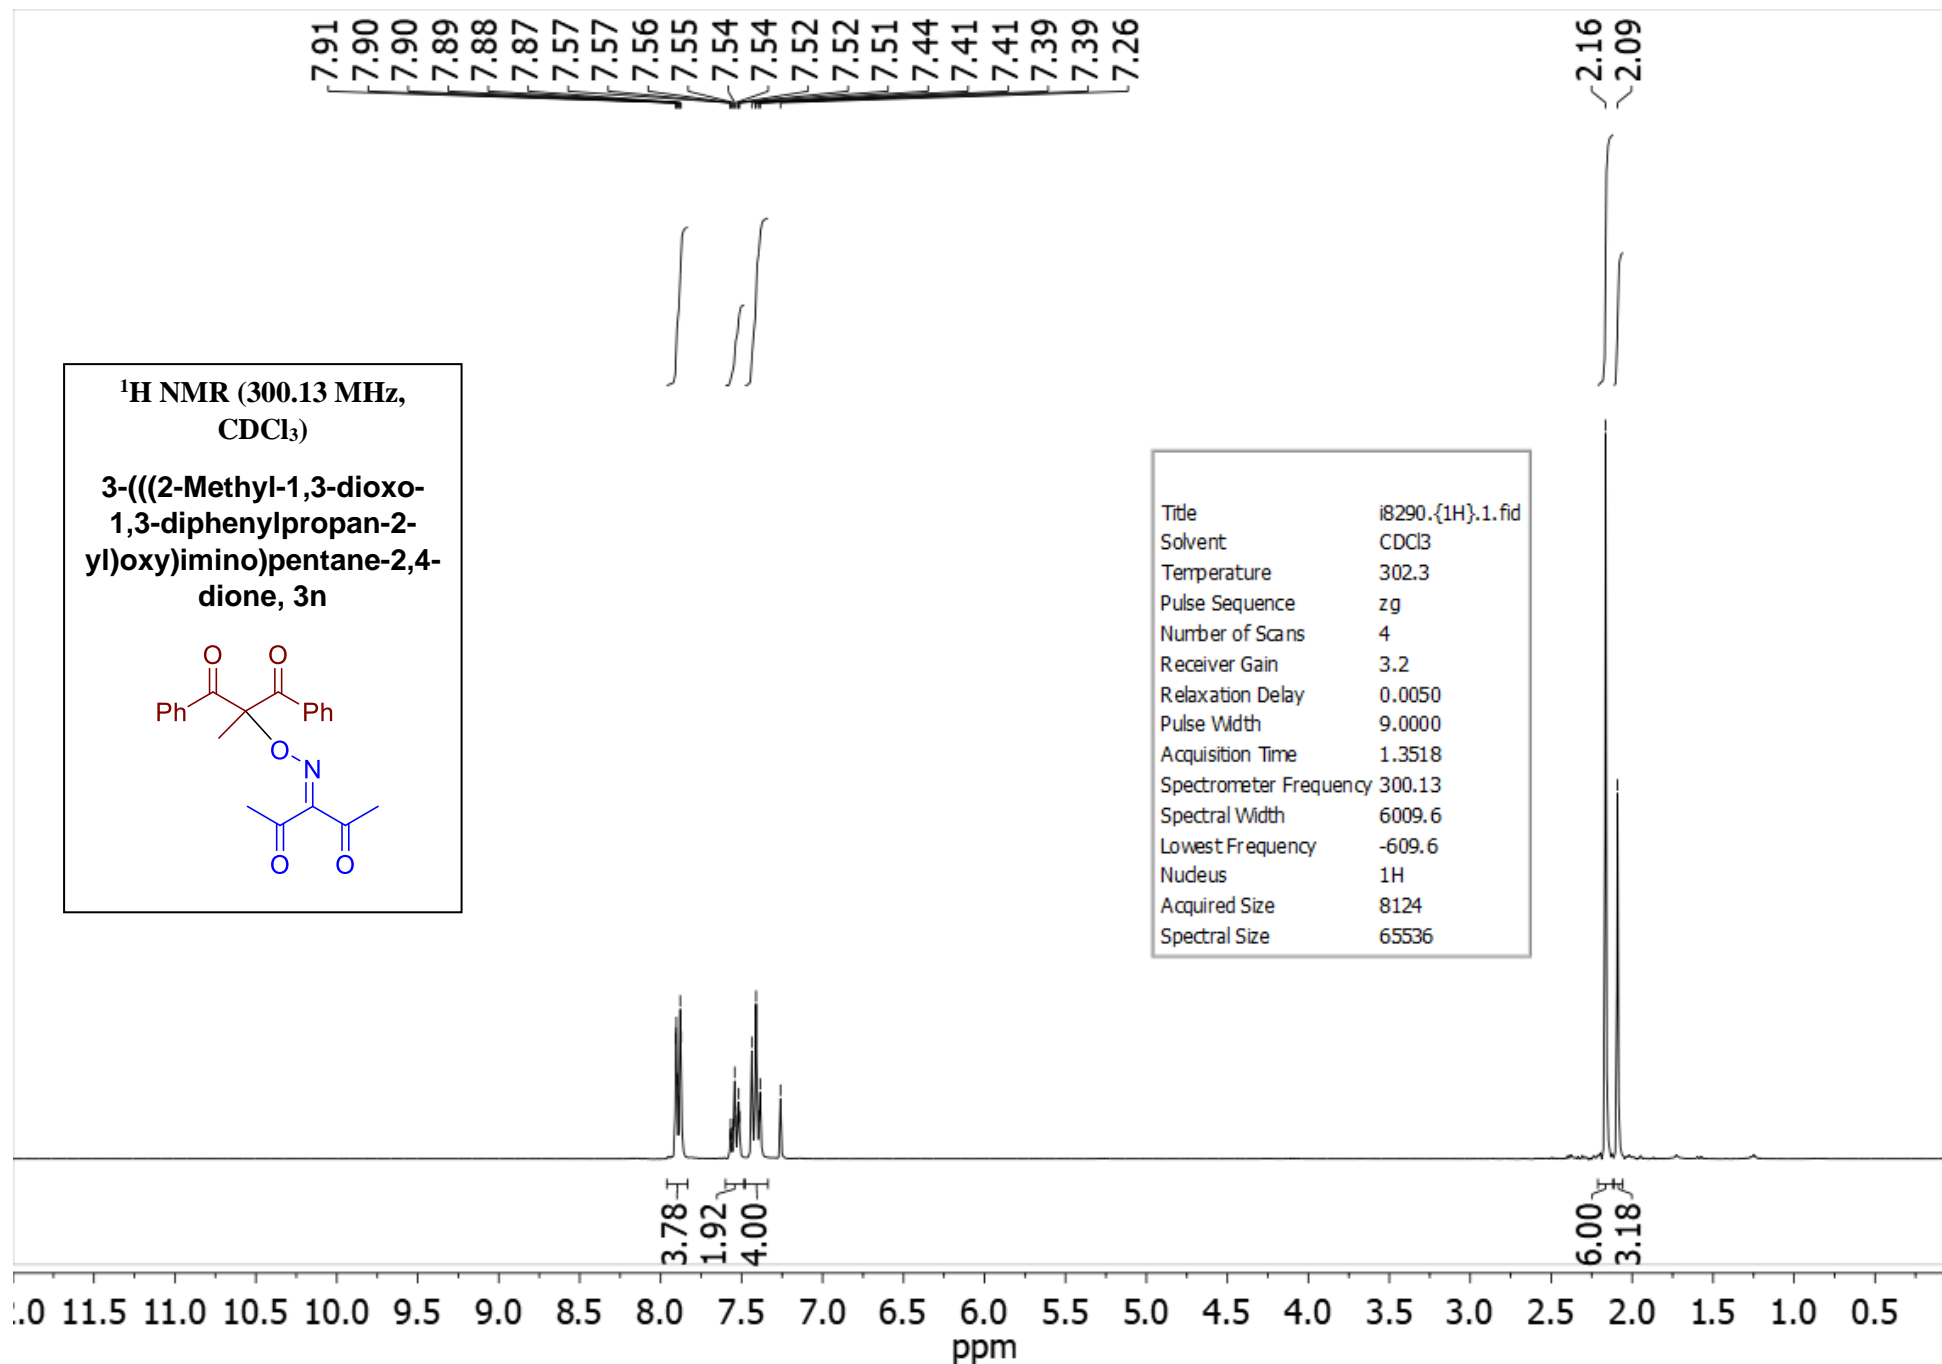

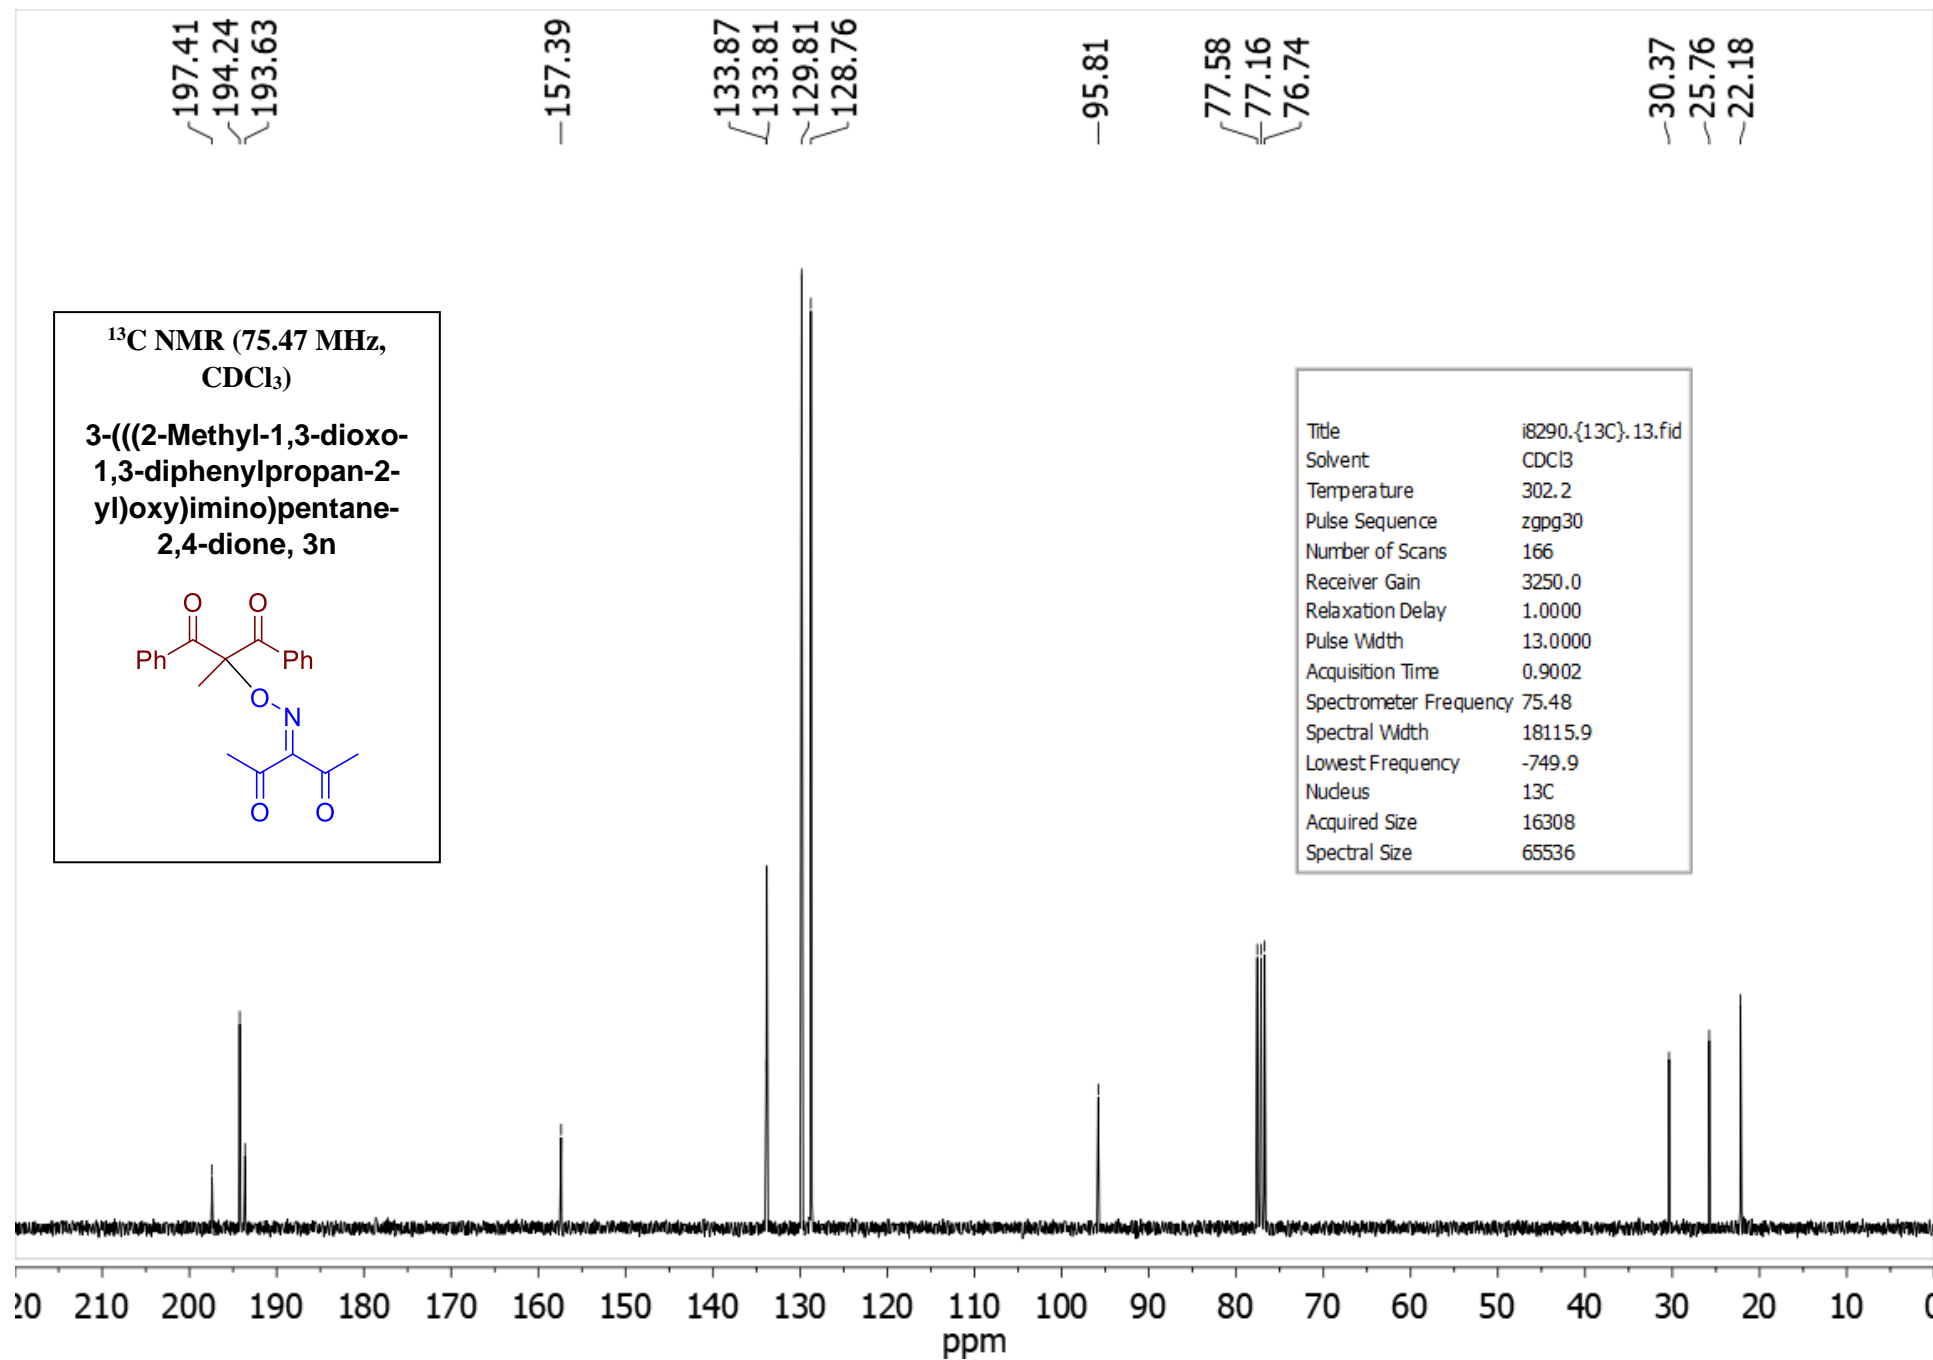

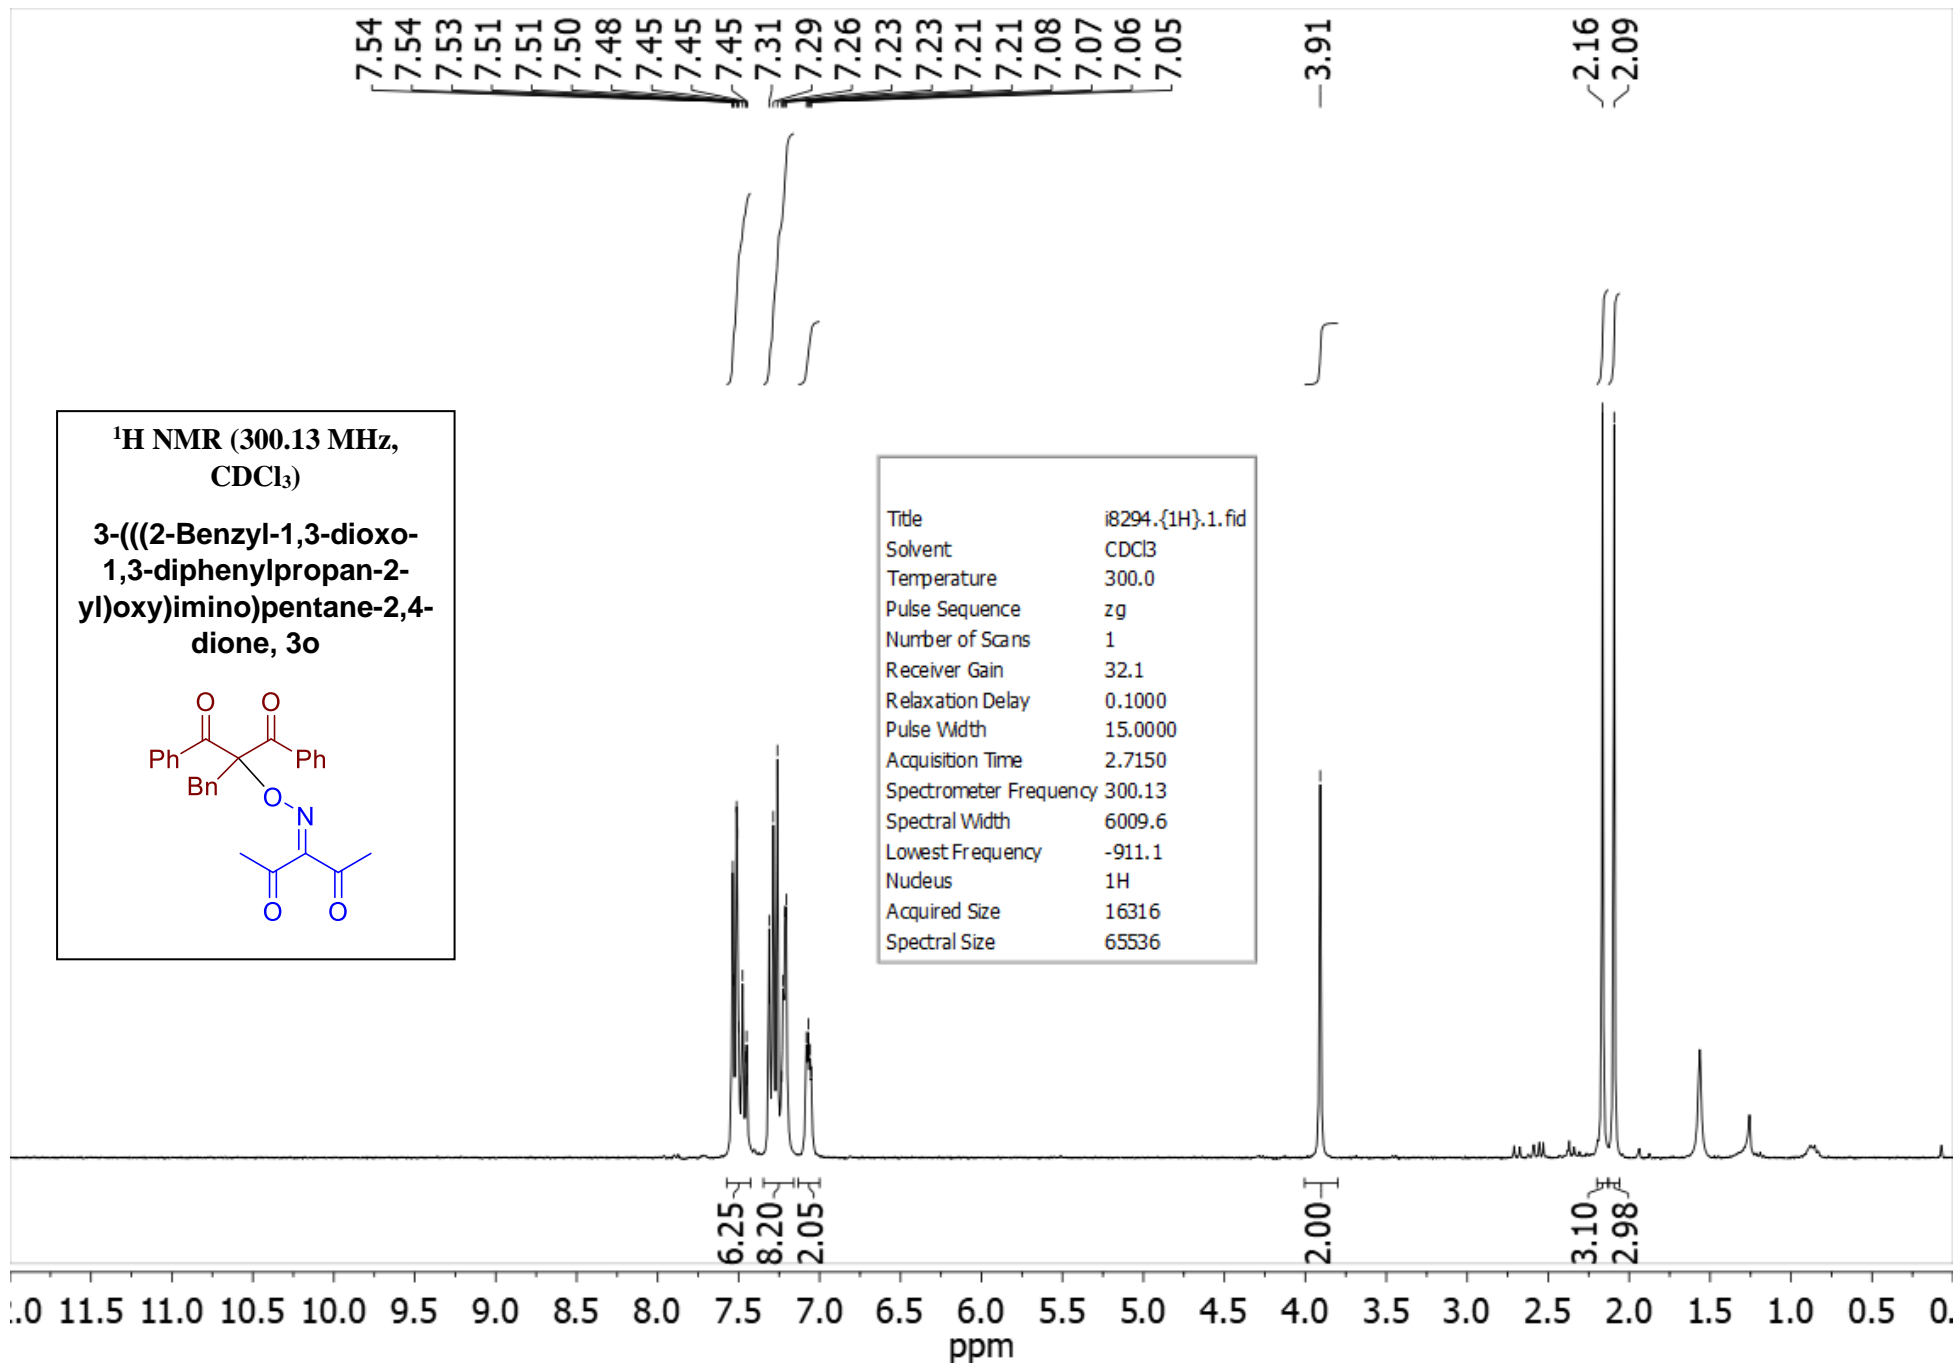

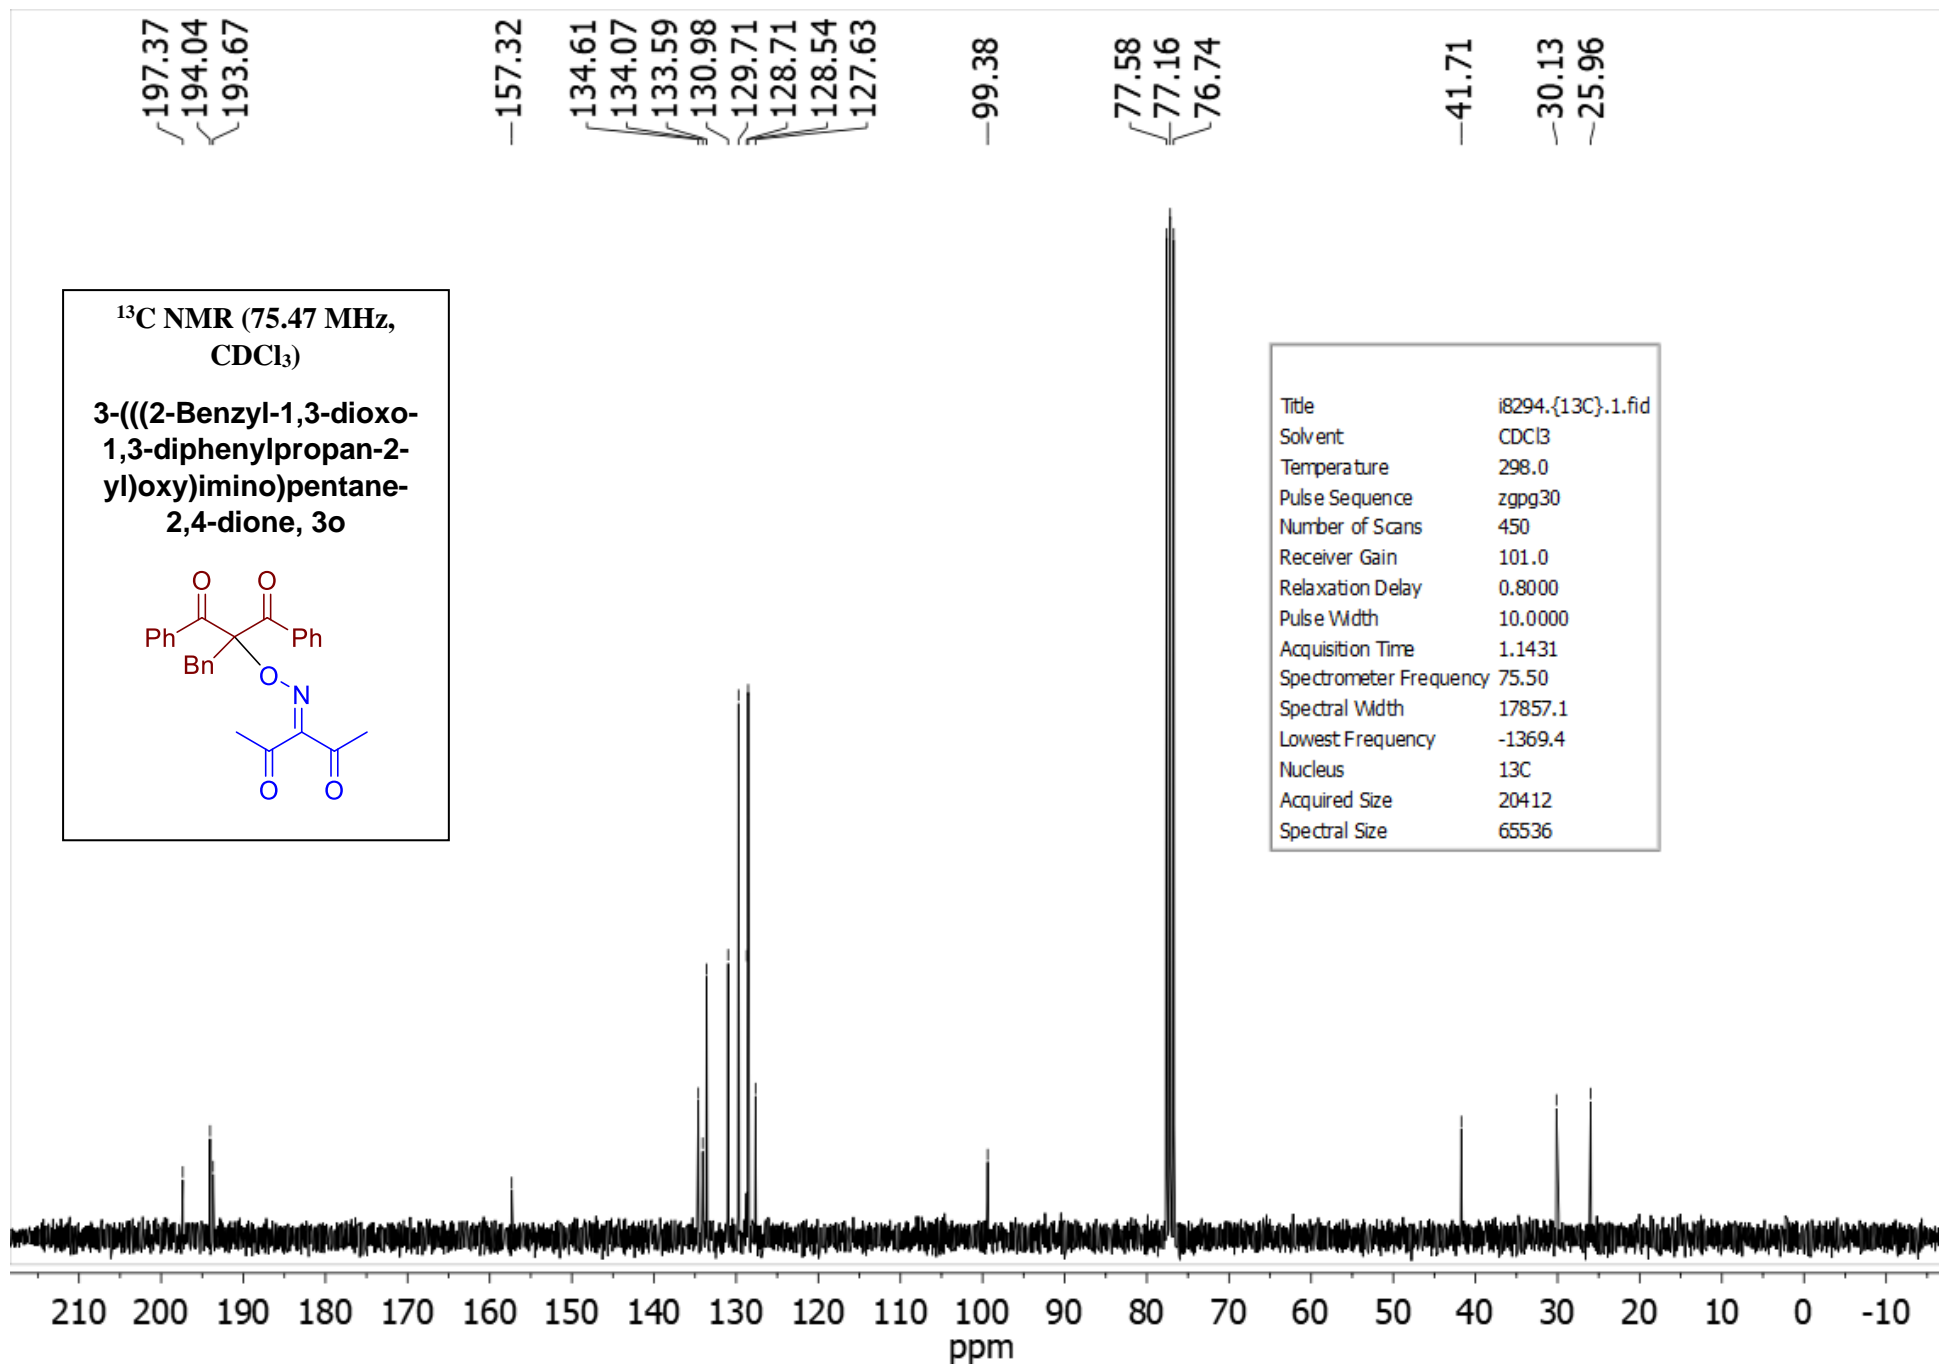

Supplement: d1ob01269j1.pdf [file d1ob01269j1.pdf]
